# Supplementary material for: The Importance of Thermally Abnormal Waters for Bioinvasions—A Case Study of Pistia stratiotes
Source: MDPI journal article supplement (doi:10.3390/d15030421), 2023-03-13
Supplement: s1 [file s1]

## Supplementary material

Table S1. Physical and chemical parameters of the environment measured at 10 permanent sampling points along the thermal stream Topla in 2015.

| Datum | Samplig<br>plot | pH   | Humidity<br>(%) | T<br>water<br>water<br>(°C) | T<br>surface<br>surface<br>(°C) | T<br>air<br>air<br>(°C) | T<br>leaf<br>leaf<br>(°C) | T<br>plantcore<br>plantcore<br>(°C) | Nitrate<br>(mg/L) | Phosphate<br>(mg/L) | PAR<br>( $\mu\text{mol}/\text{m}^2\text{s}$ ) |
|-------|-----------------|------|-----------------|-----------------------------|---------------------------------|-------------------------|---------------------------|-------------------------------------|-------------------|---------------------|-----------------------------------------------|
| 16    |                 |      |                 |                             |                                 |                         |                           |                                     |                   |                     |                                               |
| March | 1               | 7.89 | 72.5            | 27.4                        | 25.5                            | 10.09                   | 25.3                      | 23.1                                | 1                 | 0.7                 | 552                                           |
| 16    |                 |      |                 |                             |                                 |                         |                           |                                     |                   |                     |                                               |
| March | 1               | 7.89 | 72.5            | 27.4                        | 25.5                            | 10.09                   | 25.3                      | 23.1                                | 1                 | 0.7                 | 552                                           |
| 16    |                 |      |                 |                             |                                 |                         |                           |                                     |                   |                     |                                               |
| March | 1               | 7.89 | 72.5            | 27.4                        | 25.5                            | 10.09                   | 25.3                      | 23.1                                | 1                 | 0.7                 | 552                                           |
| 16    |                 |      |                 |                             |                                 |                         |                           |                                     |                   |                     |                                               |
| March | 1               | 7.89 | 72.5            | 27.4                        | 25.5                            | 10.09                   | 25.3                      | 23.1                                | 1                 | 0.7                 | 552                                           |
| 16    |                 |      |                 |                             |                                 |                         |                           |                                     |                   |                     |                                               |
| March | 1               | 7.89 | 72.5            | 27.4                        | 25.5                            | 10.09                   | 25.3                      | 23.1                                | 1                 | 0.7                 | 552                                           |
| 23    |                 |      |                 |                             |                                 |                         |                           |                                     |                   |                     |                                               |
| March | 1               | 8.38 | 60.8            | 26.9                        | 26.5                            | 14.8                    | 24.8                      | 26.1                                | 1                 | 0                   | 836                                           |
| 23    |                 |      |                 |                             |                                 |                         |                           |                                     |                   |                     |                                               |
| March | 1               | 8.38 | 60.8            | 26.9                        | 26.5                            | 14.8                    | 24.8                      | 26.1                                | 1                 | 0                   | 836                                           |
| 23    |                 |      |                 |                             |                                 |                         |                           |                                     |                   |                     |                                               |
| March | 1               | 8.38 | 60.8            | 26.9                        | 26.5                            | 14.8                    | 24.8                      | 26.1                                | 1                 | 0                   | 836                                           |
| 23    |                 |      |                 |                             |                                 |                         |                           |                                     |                   |                     |                                               |
| March | 1               | 8.38 | 60.8            | 26.9                        | 26.5                            | 14.8                    | 24.8                      | 26.1                                | 1                 | 0                   | 836                                           |
| 23    |                 |      |                 |                             |                                 |                         |                           |                                     |                   |                     |                                               |
| March | 1               | 8.38 | 60.8            | 26.9                        | 26.5                            | 14.8                    | 24.8                      | 26.1                                | 1                 | 0                   | 836                                           |
| 30    |                 |      |                 |                             |                                 |                         |                           |                                     |                   |                     |                                               |
| March | 1               | 8.24 | 50.9            | 27.8                        | 26.6                            | 19.35                   | 27.9                      | 28.1                                | 0                 | 0.2                 | 1595                                          |
| 30    |                 |      |                 |                             |                                 |                         |                           |                                     |                   |                     |                                               |
| March | 1               | 8.24 | 50.9            | 27.8                        | 26.6                            | 19.35                   | 27.9                      | 28.1                                | 0                 | 0.2                 | 1595                                          |
| 30    |                 |      |                 |                             |                                 |                         |                           |                                     |                   |                     |                                               |
| March | 1               | 8.24 | 50.9            | 27.8                        | 26.6                            | 19.35                   | 27.9                      | 28.1                                | 0                 | 0.2                 | 1595                                          |
| 30    |                 |      |                 |                             |                                 |                         |                           |                                     |                   |                     |                                               |
| March | 1               | 8.24 | 50.9            | 27.8                        | 26.6                            | 19.35                   | 27.9                      | 28.1                                | 0                 | 0.2                 | 1595                                          |
| 30    |                 |      |                 |                             |                                 |                         |                           |                                     |                   |                     |                                               |
| March | 1               | 8.24 | 50.9            | 27.8                        | 26.6                            | 19.35                   | 27.9                      | 28.1                                | 0                 | 0.2                 | 1595                                          |
| 16    |                 |      |                 |                             |                                 |                         |                           |                                     |                   |                     |                                               |
| March | 2               | 7.80 | 72.9            | 27.3                        | 25.1                            | 12.40                   | 22.6                      | 25.6                                | 3                 | 0.7                 | 752                                           |
| 16    |                 |      |                 |                             |                                 |                         |                           |                                     |                   |                     |                                               |
| March | 2               | 7.80 | 72.9            | 27.3                        | 25.1                            | 12.40                   | 22.6                      | 25.6                                | 3                 | 0.7                 | 752                                           |
| 16    |                 |      |                 |                             |                                 |                         |                           |                                     |                   |                     |                                               |
| March | 2               | 7.80 | 72.9            | 27.3                        | 25.1                            | 12.40                   | 22.6                      | 25.6                                | 3                 | 0.7                 | 752                                           |
| 16    |                 |      |                 |                             |                                 |                         |                           |                                     |                   |                     |                                               |
| March | 2               | 7.80 | 72.9            | 27.3                        | 25.1                            | 12.40                   | 22.6                      | 25.6                                | 3                 | 0.7                 | 752                                           |
| 16    |                 |      |                 |                             |                                 |                         |                           |                                     |                   |                     |                                               |
| March | 2               | 7.80 | 72.9            | 27.3                        | 25.1                            | 12.40                   | 22.6                      | 25.6                                | 3                 | 0.7                 | 752                                           |

|       |   |      |      |      |      |       |      |      |   |     |      |
|-------|---|------|------|------|------|-------|------|------|---|-----|------|
| 23    |   |      |      |      |      |       |      |      |   |     |      |
| March | 2 | 8.35 | 63.3 | 25.4 | 24.7 | 15.13 | 22.8 | 23.3 | 1 | 0   | 540  |
| 23    |   |      |      |      |      |       |      |      |   |     |      |
| March | 2 | 8.35 | 63.3 | 25.4 | 24.7 | 15.13 | 22.8 | 23.3 | 1 | 0   | 540  |
| 23    |   |      |      |      |      |       |      |      |   |     |      |
| March | 2 | 8.35 | 63.3 | 25.4 | 24.7 | 15.13 | 22.8 | 23.3 | 1 | 0   | 540  |
| 23    |   |      |      |      |      |       |      |      |   |     |      |
| March | 2 | 8.35 | 63.3 | 25.4 | 24.7 | 15.13 | 22.8 | 23.3 | 1 | 0   | 540  |
| 23    |   |      |      |      |      |       |      |      |   |     |      |
| March | 2 | 8.35 | 63.3 | 25.4 | 24.7 | 15.13 | 22.8 | 23.3 | 1 | 0   | 540  |
| 30    |   |      |      |      |      |       |      |      |   |     |      |
| March | 2 | 8.20 | 54.2 | 26   | 27.2 | 18.38 | 23.6 | 24.8 | 0 | 0.2 | 1156 |
| 30    |   |      |      |      |      |       |      |      |   |     |      |
| March | 2 | 8.20 | 54.2 | 26   | 27.2 | 18.38 | 23.6 | 24.8 | 0 | 0.2 | 1156 |
| 30    |   |      |      |      |      |       |      |      |   |     |      |
| March | 2 | 8.20 | 54.2 | 26   | 27.2 | 18.38 | 23.6 | 24.8 | 0 | 0.2 | 1156 |
| 30    |   |      |      |      |      |       |      |      |   |     |      |
| March | 2 | 8.20 | 54.2 | 26   | 27.2 | 18.38 | 23.6 | 24.8 | 0 | 0.2 | 1156 |
| 30    |   |      |      |      |      |       |      |      |   |     |      |
| March | 2 | 8.20 | 54.2 | 26   | 27.2 | 18.38 | 23.6 | 24.8 | 0 | 0.2 | 1156 |
| 16    |   |      |      |      |      |       |      |      |   |     |      |
| March | 3 | 7.92 | 71.3 | 26.4 | 25.4 | 11.70 | 21.2 | 23.3 | 1 | 0.2 | 675  |
| 16    |   |      |      |      |      |       |      |      |   |     |      |
| March | 3 | 7.92 | 71.3 | 26.4 | 25.4 | 11.70 | 21.2 | 23.3 | 1 | 0.2 | 675  |
| 16    |   |      |      |      |      |       |      |      |   |     |      |
| March | 3 | 7.92 | 71.3 | 26.4 | 25.4 | 11.70 | 21.2 | 23.3 | 1 | 0.2 | 675  |
| 16    |   |      |      |      |      |       |      |      |   |     |      |
| March | 3 | 7.92 | 71.3 | 26.4 | 25.4 | 11.70 | 21.2 | 23.3 | 1 | 0.2 | 675  |
| 16    |   |      |      |      |      |       |      |      |   |     |      |
| March | 3 | 7.92 | 71.3 | 26.4 | 25.4 | 11.70 | 21.2 | 23.3 | 1 | 0.2 | 675  |
| 23    |   |      |      |      |      |       |      |      |   |     |      |
| March | 3 | 8.29 | 47.6 | 25.3 | 25.4 | 17.50 | 20.3 | 24.6 | 1 | 0   | 762  |
| 23    |   |      |      |      |      |       |      |      |   |     |      |
| March | 3 | 8.29 | 47.6 | 25.3 | 25.4 | 17.50 | 20.3 | 24.6 | 1 | 0   | 762  |
| 23    |   |      |      |      |      |       |      |      |   |     |      |
| March | 3 | 8.29 | 47.6 | 25.3 | 25.4 | 17.50 | 20.3 | 24.6 | 1 | 0   | 762  |
| 23    |   |      |      |      |      |       |      |      |   |     |      |
| March | 3 | 8.29 | 47.6 | 25.3 | 25.4 | 17.50 | 20.3 | 24.6 | 1 | 0   | 762  |
| 23    |   |      |      |      |      |       |      |      |   |     |      |
| March | 3 | 8.29 | 47.6 | 25.3 | 25.4 | 17.50 | 20.3 | 24.6 | 1 | 0   | 762  |
| 30    |   |      |      |      |      |       |      |      |   |     |      |
| March | 3 | 8.34 | 51.4 | 24.8 | 24   | 20.60 | 24.8 | 25.3 | 0 | 0   | 1432 |
| 30    |   |      |      |      |      |       |      |      |   |     |      |
| March | 3 | 8.34 | 51.4 | 24.8 | 24   | 20.60 | 24.8 | 25.3 | 0 | 0   | 1432 |
| 30    |   |      |      |      |      |       |      |      |   |     |      |
| March | 3 | 8.34 | 51.4 | 24.8 | 24   | 20.60 | 24.8 | 25.3 | 0 | 0   | 1432 |
| 30    |   |      |      |      |      |       |      |      |   |     |      |
| March | 3 | 8.34 | 51.4 | 24.8 | 24   | 20.60 | 24.8 | 25.3 | 0 | 0   | 1432 |
| 30    |   |      |      |      |      |       |      |      |   |     |      |
| March | 3 | 8.34 | 51.4 | 24.8 | 24   | 20.60 | 24.8 | 25.3 | 0 | 0   | 1432 |

|       |   |      |      |      |      |       |      |      |   |     |      |
|-------|---|------|------|------|------|-------|------|------|---|-----|------|
| 16    |   |      |      |      |      |       |      |      |   |     |      |
| March | 4 | 7.98 | 72.4 | 26.3 | 25.7 | 12.78 | 23.4 | 25.1 | 1 | 0.2 | 438  |
| 16    |   |      |      |      |      |       |      |      |   |     |      |
| March | 4 | 7.98 | 72.4 | 26.3 | 25.7 | 12.78 | 23.4 | 25.1 | 1 | 0.2 | 438  |
| 16    |   |      |      |      |      |       |      |      |   |     |      |
| March | 4 | 7.98 | 72.4 | 26.3 | 25.7 | 12.78 | 23.4 | 25.1 | 1 | 0.2 | 438  |
| 16    |   |      |      |      |      |       |      |      |   |     |      |
| March | 4 | 7.98 | 72.4 | 26.3 | 25.7 | 12.78 | 23.4 | 25.1 | 1 | 0.2 | 438  |
| 16    |   |      |      |      |      |       |      |      |   |     |      |
| March | 4 | 7.98 | 72.4 | 26.3 | 25.7 | 12.78 | 23.4 | 25.1 | 1 | 0.2 | 438  |
| 23    |   |      |      |      |      |       |      |      |   |     |      |
| March | 4 | 8.26 | 53.3 | 24.5 | 23.1 | 15.2  | 20.8 | 22.1 | 1 | 0   | 808  |
| 23    |   |      |      |      |      |       |      |      |   |     |      |
| March | 4 | 8.26 | 53.3 | 24.5 | 23.1 | 15.2  | 20.8 | 22.1 | 1 | 0   | 808  |
| 23    |   |      |      |      |      |       |      |      |   |     |      |
| March | 4 | 8.26 | 53.3 | 24.5 | 23.1 | 15.2  | 20.8 | 22.1 | 1 | 0   | 808  |
| 23    |   |      |      |      |      |       |      |      |   |     |      |
| March | 4 | 8.26 | 53.3 | 24.5 | 23.1 | 15.2  | 20.8 | 22.1 | 1 | 0   | 808  |
| 30    |   |      |      |      |      |       |      |      |   |     |      |
| March | 4 | 8.47 | 67.2 | 24.3 | 24.6 | 19.06 | 23.7 | 24.9 | 0 | 0   | 1860 |
| 30    |   |      |      |      |      |       |      |      |   |     |      |
| March | 4 | 8.47 | 67.2 | 24.3 | 24.6 | 19.06 | 23.7 | 24.9 | 0 | 0   | 1860 |
| 30    |   |      |      |      |      |       |      |      |   |     |      |
| March | 4 | 8.47 | 67.2 | 24.3 | 24.6 | 19.06 | 23.7 | 24.9 | 0 | 0   | 1860 |
| 30    |   |      |      |      |      |       |      |      |   |     |      |
| March | 4 | 8.47 | 67.2 | 24.3 | 24.6 | 19.06 | 23.7 | 24.9 | 0 | 0   | 1860 |
| 30    |   |      |      |      |      |       |      |      |   |     |      |
| March | 4 | 8.47 | 67.2 | 24.3 | 24.6 | 19.06 | 23.7 | 24.9 | 0 | 0   | 1860 |
| 16    |   |      |      |      |      |       |      |      |   |     |      |
| March | 5 | 7.97 | 62.2 | 24.2 | 21.7 | 13.51 | 19.3 | 20.8 | 1 | 0.5 | 364  |
| 16    |   |      |      |      |      |       |      |      |   |     |      |
| March | 5 | 7.97 | 62.2 | 24.2 | 21.7 | 13.51 | 19.3 | 20.8 | 1 | 0.5 | 364  |
| 16    |   |      |      |      |      |       |      |      |   |     |      |
| March | 5 | 7.97 | 62.2 | 24.2 | 21.7 | 13.51 | 19.3 | 20.8 | 1 | 0.5 | 364  |
| 16    |   |      |      |      |      |       |      |      |   |     |      |
| March | 5 | 7.97 | 62.2 | 24.2 | 21.7 | 13.51 | 19.3 | 20.8 | 1 | 0.5 | 364  |
| 23    |   |      |      |      |      |       |      |      |   |     |      |
| March | 5 | 8.08 | 64   | 24.4 | 23.6 | 16.17 | 23.9 | 24.2 | 3 | 0.2 | 832  |
| 23    |   |      |      |      |      |       |      |      |   |     |      |
| March | 5 | 8.08 | 64   | 24.4 | 23.6 | 16.17 | 23.9 | 24.2 | 3 | 0.2 | 832  |
| 23    |   |      |      |      |      |       |      |      |   |     |      |
| March | 5 | 8.08 | 64   | 24.4 | 23.6 | 16.17 | 23.9 | 24.2 | 3 | 0.2 | 832  |
| 23    |   |      |      |      |      |       |      |      |   |     |      |
| March | 5 | 8.08 | 64   | 24.4 | 23.6 | 16.17 | 23.9 | 24.2 | 3 | 0.2 | 832  |
| 23    |   |      |      |      |      |       |      |      |   |     |      |
| March | 5 | 8.08 | 64   | 24.4 | 23.6 | 16.17 | 23.9 | 24.2 | 3 | 0.2 | 832  |

---

|       |   |      |      |      |      |       |      |      |   |     |      |
|-------|---|------|------|------|------|-------|------|------|---|-----|------|
| 30    |   |      |      |      |      |       |      |      |   |     |      |
| March | 5 | 7.97 | 50.2 | 24.7 | 24.2 | 17.51 | 24.7 | 26.1 | 1 | 0.2 | 1630 |
| 30    |   |      |      |      |      |       |      |      |   |     |      |
| March | 5 | 7.97 | 50.2 | 24.7 | 24.2 | 17.51 | 24.7 | 26.1 | 1 | 0.2 | 1630 |
| 30    |   |      |      |      |      |       |      |      |   |     |      |
| March | 5 | 7.97 | 50.2 | 24.7 | 24.2 | 17.51 | 24.7 | 26.1 | 1 | 0.2 | 1630 |
| 30    |   |      |      |      |      |       |      |      |   |     |      |
| March | 5 | 7.97 | 50.2 | 24.7 | 24.2 | 17.51 | 24.7 | 26.1 | 1 | 0.2 | 1630 |
| 30    |   |      |      |      |      |       |      |      |   |     |      |
| March | 5 | 7.97 | 50.2 | 24.7 | 24.2 | 17.51 | 24.7 | 26.1 | 1 | 0.2 | 1630 |
| 16    |   |      |      |      |      |       |      |      |   |     |      |
| March | 6 | 7.89 | 67.1 | 23.4 | 22.4 | 13.59 | 20.9 | 21.6 | 1 | 0.5 | 425  |
| 16    |   |      |      |      |      |       |      |      |   |     |      |
| March | 6 | 7.89 | 67.1 | 23.4 | 22.4 | 13.59 | 20.9 | 21.6 | 1 | 0.5 | 425  |
| 16    |   |      |      |      |      |       |      |      |   |     |      |
| March | 6 | 7.89 | 67.1 | 23.4 | 22.4 | 13.59 | 20.9 | 21.6 | 1 | 0.5 | 425  |
| 16    |   |      |      |      |      |       |      |      |   |     |      |
| March | 6 | 7.89 | 67.1 | 23.4 | 22.4 | 13.59 | 20.9 | 21.6 | 1 | 0.5 | 425  |
| 16    |   |      |      |      |      |       |      |      |   |     |      |
| March | 6 | 7.89 | 67.1 | 23.4 | 22.4 | 13.59 | 20.9 | 21.6 | 1 | 0.5 | 425  |
| 23    |   |      |      |      |      |       |      |      |   |     |      |
| March | 6 | 7.89 | 58.5 | 23.1 | 23.3 | 12.33 | 23.8 | 19.8 | 3 | 0.2 | 1134 |
| 23    |   |      |      |      |      |       |      |      |   |     |      |
| March | 6 | 7.89 | 58.5 | 23.1 | 23.3 | 12.33 | 23.8 | 19.8 | 3 | 0.2 | 1134 |
| 23    |   |      |      |      |      |       |      |      |   |     |      |
| March | 6 | 7.89 | 58.5 | 23.1 | 23.3 | 12.33 | 23.8 | 19.8 | 3 | 0.2 | 1134 |
| 23    |   |      |      |      |      |       |      |      |   |     |      |
| March | 6 | 7.89 | 58.5 | 23.1 | 23.3 | 12.33 | 23.8 | 19.8 | 3 | 0.2 | 1134 |
| 23    |   |      |      |      |      |       |      |      |   |     |      |
| March | 6 | 7.89 | 58.5 | 23.1 | 23.3 | 12.33 | 23.8 | 19.8 | 3 | 0.2 | 1134 |
| 30    |   |      |      |      |      |       |      |      |   |     |      |
| March | 6 | 7.86 | 60.2 | 22.5 | 23.1 | 19.04 | 22.2 | 23.6 | 1 | 0.2 | 436  |
| 30    |   |      |      |      |      |       |      |      |   |     |      |
| March | 6 | 7.86 | 60.2 | 22.5 | 23.1 | 19.04 | 22.2 | 23.6 | 1 | 0.2 | 436  |
| 30    |   |      |      |      |      |       |      |      |   |     |      |
| March | 6 | 7.86 | 60.2 | 22.5 | 23.1 | 19.04 | 22.2 | 23.6 | 1 | 0.2 | 436  |
| 30    |   |      |      |      |      |       |      |      |   |     |      |
| March | 6 | 7.86 | 60.2 | 22.5 | 23.1 | 19.04 | 22.2 | 23.6 | 1 | 0.2 | 436  |
| 30    |   |      |      |      |      |       |      |      |   |     |      |
| March | 6 | 7.86 | 60.2 | 22.5 | 23.1 | 19.04 | 22.2 | 23.6 | 1 | 0.2 | 436  |
| 16    |   |      |      |      |      |       |      |      |   |     |      |
| March | 7 | 7.80 | 73.5 | 21.8 | 21.9 | 11.57 | 20.7 | 21.2 | 3 | 0   | 210  |
| 16    |   |      |      |      |      |       |      |      |   |     |      |
| March | 7 | 7.80 | 73.5 | 21.8 | 21.9 | 11.57 | 20.7 | 21.2 | 3 | 0   | 210  |
| 16    |   |      |      |      |      |       |      |      |   |     |      |
| March | 7 | 7.80 | 73.5 | 21.8 | 21.9 | 11.57 | 20.7 | 21.2 | 3 | 0   | 210  |
| 16    |   |      |      |      |      |       |      |      |   |     |      |
| March | 7 | 7.80 | 73.5 | 21.8 | 21.9 | 11.57 | 20.7 | 21.2 | 3 | 0   | 210  |
| 16    |   |      |      |      |      |       |      |      |   |     |      |
| March | 7 | 7.80 | 73.5 | 21.8 | 21.9 | 11.57 | 20.7 | 21.2 | 3 | 0   | 210  |

---

|         |   |      |      |      |      |       |      |      |   |     |      |
|---------|---|------|------|------|------|-------|------|------|---|-----|------|
| 23      |   |      |      |      |      |       |      |      |   |     |      |
| March   | 7 | 8.77 | 54.8 | 17.6 | 16.8 | 14.3  | 16.6 | 15.9 | 1 | 0.7 | 808  |
| 23      |   |      |      |      |      |       |      |      |   |     |      |
| March   | 7 | 8.77 | 54.8 | 17.6 | 16.8 | 14.3  | 16.6 | 15.9 | 1 | 0.7 | 808  |
| 23      |   |      |      |      |      |       |      |      |   |     |      |
| March   | 7 | 8.77 | 54.8 | 17.6 | 16.8 | 14.3  | 16.6 | 15.9 | 1 | 0.7 | 808  |
| 23      |   |      |      |      |      |       |      |      |   |     |      |
| March   | 7 | 8.77 | 54.8 | 17.6 | 16.8 | 14.3  | 16.6 | 15.9 | 1 | 0.7 | 808  |
| 23      |   |      |      |      |      |       |      |      |   |     |      |
| March   | 7 | 8.77 | 54.8 | 17.6 | 16.8 | 14.3  | 16.6 | 15.9 | 1 | 0.7 | 808  |
| 30      |   |      |      |      |      |       |      |      |   |     |      |
| March   | 7 | 7.86 | 56.9 | 22.1 | 24.1 | 16.85 | 24.5 | 22.5 | 3 | 0.2 | 652  |
| 30      |   |      |      |      |      |       |      |      |   |     |      |
| March   | 7 | 7.86 | 56.9 | 22.1 | 24.1 | 16.85 | 24.5 | 22.5 | 3 | 0.2 | 652  |
| 30      |   |      |      |      |      |       |      |      |   |     |      |
| March   | 7 | 7.86 | 56.9 | 22.1 | 24.1 | 16.85 | 24.5 | 22.5 | 3 | 0.2 | 652  |
| 30      |   |      |      |      |      |       |      |      |   |     |      |
| March   | 7 | 7.86 | 56.9 | 22.1 | 24.1 | 16.85 | 24.5 | 22.5 | 3 | 0.2 | 652  |
| 30      |   |      |      |      |      |       |      |      |   |     |      |
| March   | 7 | 7.86 | 56.9 | 22.1 | 24.1 | 16.85 | 24.5 | 22.5 | 3 | 0.2 | 652  |
| 16      |   |      |      |      |      |       |      |      |   |     |      |
| March   | 8 | 7.79 | 71.9 | 21.6 | 21.5 | 12.68 | 20.0 | 21.2 | 5 | 0.3 | 117  |
| 16      |   |      |      |      |      |       |      |      |   |     |      |
| March   | 8 | 7.79 | 71.9 | 21.6 | 21.5 | 12.68 | 20.0 | 21.2 | 5 | 0.3 | 117  |
| 16      |   |      |      |      |      |       |      |      |   |     |      |
| March   | 8 | 7.79 | 71.9 | 21.6 | 21.5 | 12.68 | 20.0 | 21.2 | 5 | 0.3 | 117  |
| 16      |   |      |      |      |      |       |      |      |   |     |      |
| March   | 8 | 7.79 | 71.9 | 21.6 | 21.5 | 12.68 | 20.0 | 21.2 | 5 | 0.3 | 117  |
| 16      |   |      |      |      |      |       |      |      |   |     |      |
| March   | 8 | 7.79 | 71.9 | 21.6 | 21.5 | 12.68 | 20.0 | 21.2 | 5 | 0.3 | 117  |
| 23      |   |      |      |      |      |       |      |      |   |     |      |
| March   | 8 | 7.85 | 54.8 | 20.8 | 21.9 | 10.33 | 22.2 | 21.9 | 3 | 0.2 | 692  |
| 23      |   |      |      |      |      |       |      |      |   |     |      |
| March   | 8 | 7.85 | 54.8 | 20.8 | 21.9 | 10.33 | 22.2 | 21.9 | 3 | 0.2 | 692  |
| 23      |   |      |      |      |      |       |      |      |   |     |      |
| March   | 8 | 7.85 | 54.8 | 20.8 | 21.9 | 10.33 | 22.2 | 21.9 | 3 | 0.2 | 692  |
| 23      |   |      |      |      |      |       |      |      |   |     |      |
| March   | 8 | 7.85 | 54.8 | 20.8 | 21.9 | 10.33 | 22.2 | 21.9 | 3 | 0.2 | 692  |
| 30      |   |      |      |      |      |       |      |      |   |     |      |
| March   | 8 | 7.91 | 50   | 21   | 21.1 | 16.8  | 21.7 | 22.3 | 1 | 0.2 | 1020 |
| 30      |   |      |      |      |      |       |      |      |   |     |      |
| March   | 8 | 7.91 | 50   | 21   | 21.1 | 16.8  | 21.7 | 22.3 | 1 | 0.2 | 1020 |
| 30      |   |      |      |      |      |       |      |      |   |     |      |
| March   | 8 | 7.91 | 50   | 21   | 21.1 | 16.8  | 21.7 | 22.3 | 1 | 0.2 | 1020 |
| 30      |   |      |      |      |      |       |      |      |   |     |      |
| March   | 8 | 7.91 | 50   | 21   | 21.1 | 16.8  | 21.7 | 22.3 | 1 | 0.2 | 1020 |
| 30      |   |      |      |      |      |       |      |      |   |     |      |
| March   | 8 | 7.91 | 50   | 21   | 21.1 | 16.8  | 21.7 | 22.3 | 1 | 0.2 | 1020 |
| 6 April | 1 | 8.44 | 45.3 | 25.5 | 24.9 | 10.77 | 26.4 | 26.5 | 0 | 0.2 | 988  |

|         |   |      |      |      |      |       |      |      |   |     |     |
|---------|---|------|------|------|------|-------|------|------|---|-----|-----|
| 6 April | 1 | 8.44 | 45.3 | 25.5 | 24.9 | 10.77 | 26.4 | 26.5 | 0 | 0.2 | 988 |
| 6 April | 1 | 8.44 | 45.3 | 25.5 | 24.9 | 10.77 | 26.4 | 26.5 | 0 | 0.2 | 988 |
| 6 April | 1 | 8.44 | 45.3 | 25.5 | 24.9 | 10.77 | 26.4 | 26.5 | 0 | 0.2 | 988 |
| 6 April | 1 | 8.44 | 45.3 | 25.5 | 24.9 | 10.77 | 26.4 | 26.5 | 0 | 0.2 | 988 |
| 13      |   |      |      |      |      |       |      |      |   |     |     |
| April   | 1 | 8.35 | 48.7 | 26.8 | 27.3 | 14.4  | 26.5 | 26.7 | 1 | 0.2 | 856 |
| 13      |   |      |      |      |      |       |      |      |   |     |     |
| April   | 1 | 8.35 | 48.7 | 26.8 | 27.3 | 14.4  | 26.5 | 26.7 | 1 | 0.2 | 856 |
| 13      |   |      |      |      |      |       |      |      |   |     |     |
| April   | 1 | 8.35 | 48.7 | 26.8 | 27.3 | 14.4  | 26.5 | 26.7 | 1 | 0.2 | 856 |
| 13      |   |      |      |      |      |       |      |      |   |     |     |
| April   | 1 | 8.35 | 48.7 | 26.8 | 27.3 | 14.4  | 26.5 | 26.7 | 1 | 0.2 | 856 |
| 13      |   |      |      |      |      |       |      |      |   |     |     |
| April   | 1 | 8.35 | 48.7 | 26.8 | 27.3 | 14.4  | 26.5 | 26.7 | 1 | 0.2 | 856 |
| 20      |   |      |      |      |      |       |      |      |   |     |     |
| April   | 1 | 8.42 | 40.2 | 27.9 | 28.3 | 17.6  | 29.6 | 29.4 | 1 | 0.2 | 568 |
| 20      |   |      |      |      |      |       |      |      |   |     |     |
| April   | 1 | 8.42 | 40.2 | 27.9 | 28.3 | 17.6  | 29.6 | 29.4 | 1 | 0.2 | 568 |
| 20      |   |      |      |      |      |       |      |      |   |     |     |
| April   | 1 | 8.42 | 40.2 | 27.9 | 28.3 | 17.6  | 29.6 | 29.4 | 1 | 0.2 | 568 |
| 20      |   |      |      |      |      |       |      |      |   |     |     |
| April   | 1 | 8.42 | 40.2 | 27.9 | 28.3 | 17.6  | 29.6 | 29.4 | 1 | 0.2 | 568 |
| 20      |   |      |      |      |      |       |      |      |   |     |     |
| April   | 1 | 8.42 | 40.2 | 27.9 | 28.3 | 17.6  | 29.6 | 29.4 | 1 | 0.2 | 568 |
| 27      |   |      |      |      |      |       |      |      |   |     |     |
| April   | 1 | 8.37 | 57.8 | 32.2 | 31.3 | 24.3  | 32.1 | 32.3 | 1 | 0.2 | 547 |
| 27      |   |      |      |      |      |       |      |      |   |     |     |
| April   | 1 | 8.37 | 57.8 | 32.2 | 31.3 | 24.3  | 32.1 | 32.3 | 1 | 0.2 | 547 |
| 27      |   |      |      |      |      |       |      |      |   |     |     |
| April   | 1 | 8.37 | 57.8 | 32.2 | 31.3 | 24.3  | 32.1 | 32.3 | 1 | 0.2 | 547 |
| 27      |   |      |      |      |      |       |      |      |   |     |     |
| April   | 1 | 8.37 | 57.8 | 32.2 | 31.3 | 24.3  | 32.1 | 32.3 | 1 | 0.2 | 547 |
| 27      |   |      |      |      |      |       |      |      |   |     |     |
| April   | 1 | 8.37 | 57.8 | 32.2 | 31.3 | 24.3  | 32.1 | 32.3 | 1 | 0.2 | 547 |
| 27      |   |      |      |      |      |       |      |      |   |     |     |
| April   | 1 | 8.37 | 57.8 | 32.2 | 31.3 | 24.3  | 32.1 | 32.3 | 1 | 0.2 | 547 |
| 27      |   |      |      |      |      |       |      |      |   |     |     |
| April   | 2 | 8.48 | 44   | 24.2 | 24   | 10.26 | 19.4 | 19.8 | 1 | 0.2 | 671 |
| 6 April | 2 | 8.48 | 44   | 24.2 | 24   | 10.26 | 19.4 | 19.8 | 1 | 0.2 | 671 |
| 6 April | 2 | 8.48 | 44   | 24.2 | 24   | 10.26 | 19.4 | 19.8 | 1 | 0.2 | 671 |
| 6 April | 2 | 8.48 | 44   | 24.2 | 24   | 10.26 | 19.4 | 19.8 | 1 | 0.2 | 671 |
| 6 April | 2 | 8.48 | 44   | 24.2 | 24   | 10.26 | 19.4 | 19.8 | 1 | 0.2 | 671 |
| 6 April | 2 | 8.48 | 44   | 24.2 | 24   | 10.26 | 19.4 | 19.8 | 1 | 0.2 | 671 |
| 13      |   |      |      |      |      |       |      |      |   |     |     |
| April   | 2 | 8.44 | 44.6 | 26   | 26.6 | 14.6  | 25.9 | 26.3 | 1 | 0.2 | 803 |
| 13      |   |      |      |      |      |       |      |      |   |     |     |
| April   | 2 | 8.44 | 44.6 | 26   | 26.6 | 14.6  | 25.9 | 26.3 | 1 | 0.2 | 803 |
| 13      |   |      |      |      |      |       |      |      |   |     |     |
| April   | 2 | 8.44 | 44.6 | 26   | 26.6 | 14.6  | 25.9 | 26.3 | 1 | 0.2 | 803 |
| 13      |   |      |      |      |      |       |      |      |   |     |     |
| April   | 2 | 8.44 | 44.6 | 26   | 26.6 | 14.6  | 25.9 | 26.3 | 1 | 0.2 | 803 |
| 13      |   |      |      |      |      |       |      |      |   |     |     |
| April   | 2 | 8.44 | 44.6 | 26   | 26.6 | 14.6  | 25.9 | 26.3 | 1 | 0.2 | 803 |
| 20      |   |      |      |      |      |       |      |      |   |     |     |
| April   | 2 | 8.43 | 33.8 | 27.7 | 27   | 17.5  | 27.6 | 26.4 | 1 | 0.2 | 356 |

---

|          |   |      |      |      |      |       |      |      |   |     |      |
|----------|---|------|------|------|------|-------|------|------|---|-----|------|
| 20       |   |      |      |      |      |       |      |      |   |     |      |
| April 20 | 2 | 8.43 | 33.8 | 27.7 | 27   | 17.5  | 27.6 | 26.4 | 1 | 0.2 | 356  |
| April 20 | 2 | 8.43 | 33.8 | 27.7 | 27   | 17.5  | 27.6 | 26.4 | 1 | 0.2 | 356  |
| April 20 | 2 | 8.43 | 33.8 | 27.7 | 27   | 17.5  | 27.6 | 26.4 | 1 | 0.2 | 356  |
| April 27 | 2 | 8.43 | 33.8 | 27.7 | 27   | 17.5  | 27.6 | 26.4 | 1 | 0.2 | 356  |
| April 27 | 2 | 8.33 | 66.5 | 32   | 31.8 | 24.9  | 31.5 | 30.2 | 1 | 0.2 | 236  |
| April 27 | 2 | 8.33 | 66.5 | 32   | 31.8 | 24.9  | 31.5 | 30.2 | 1 | 0.2 | 236  |
| April 27 | 2 | 8.33 | 66.5 | 32   | 31.8 | 24.9  | 31.5 | 30.2 | 1 | 0.2 | 236  |
| April 27 | 2 | 8.33 | 66.5 | 32   | 31.8 | 24.9  | 31.5 | 30.2 | 1 | 0.2 | 236  |
| April 27 | 2 | 8.33 | 66.5 | 32   | 31.8 | 24.9  | 31.5 | 30.2 | 1 | 0.2 | 236  |
| 6 April  | 3 | 8.47 | 52.1 | 23   | 22.3 | 10.61 | 18.8 | 22.4 | 1 | 0.2 | 1134 |
| 6 April  | 3 | 8.47 | 52.1 | 23   | 22.3 | 10.61 | 18.8 | 22.4 | 1 | 0.2 | 1134 |
| 6 April  | 3 | 8.47 | 52.1 | 23   | 22.3 | 10.61 | 18.8 | 22.4 | 1 | 0.2 | 1134 |
| 6 April  | 3 | 8.47 | 52.1 | 23   | 22.3 | 10.61 | 18.8 | 22.4 | 1 | 0.2 | 1134 |
| 6 April  | 3 | 8.47 | 52.1 | 23   | 22.3 | 10.61 | 18.8 | 22.4 | 1 | 0.2 | 1134 |
| 13       |   |      |      |      |      |       |      |      |   |     |      |
| April 13 | 3 | 8.45 | 50.1 | 25.8 | 26   | 14.78 | 25.2 | 26.1 | 1 | 0   | 759  |
| April 13 | 3 | 8.45 | 50.1 | 25.8 | 26   | 14.78 | 25.2 | 26.1 | 1 | 0   | 759  |
| April 13 | 3 | 8.45 | 50.1 | 25.8 | 26   | 14.78 | 25.2 | 26.1 | 1 | 0   | 759  |
| April 13 | 3 | 8.45 | 50.1 | 25.8 | 26   | 14.78 | 25.2 | 26.1 | 1 | 0   | 759  |
| April 13 | 3 | 8.45 | 50.1 | 25.8 | 26   | 14.78 | 25.2 | 26.1 | 1 | 0   | 759  |
| April 20 | 3 | 8.45 | 50.1 | 25.8 | 26   | 14.78 | 25.2 | 26.1 | 1 | 0   | 759  |
| April 20 | 3 | 8.33 | 39.1 | 27.3 | 27.2 | 16.3  | 26.5 | 29.5 | 0 | 0   | 456  |
| April 20 | 3 | 8.33 | 39.1 | 27.3 | 27.2 | 16.3  | 26.5 | 29.5 | 0 | 0   | 456  |
| April 20 | 3 | 8.33 | 39.1 | 27.3 | 27.2 | 16.3  | 26.5 | 29.5 | 0 | 0   | 456  |
| April 20 | 3 | 8.33 | 39.1 | 27.3 | 27.2 | 16.3  | 26.5 | 29.5 | 0 | 0   | 456  |
| April 20 | 3 | 8.33 | 39.1 | 27.3 | 27.2 | 16.3  | 26.5 | 29.5 | 0 | 0   | 456  |
| April 27 | 3 | 8.35 | 63.3 | 31.8 | 30.5 | 24.26 | 30.2 | 29.5 | 1 | 0.2 | 451  |
| April 27 | 3 | 8.35 | 63.3 | 31.8 | 30.5 | 24.26 | 30.2 | 29.5 | 1 | 0.2 | 451  |
| April 27 | 3 | 8.35 | 63.3 | 31.8 | 30.5 | 24.26 | 30.2 | 29.5 | 1 | 0.2 | 451  |
| April 27 | 3 | 8.35 | 63.3 | 31.8 | 30.5 | 24.26 | 30.2 | 29.5 | 1 | 0.2 | 451  |

---

|         |   |      |      |      |      |       |      |      |   |     |     |
|---------|---|------|------|------|------|-------|------|------|---|-----|-----|
| 27      |   |      |      |      |      |       |      |      |   |     |     |
| April   | 3 | 8.35 | 63.3 | 31.8 | 30.5 | 24.26 | 30.2 | 29.5 | 1 | 0.2 | 451 |
| 6 April | 4 | 8.46 | 49.8 | 22.9 | 20.9 | 9.5   | 19.8 | 19.6 | 1 | 0   | 489 |
| 6 April | 4 | 8.46 | 49.8 | 22.9 | 20.9 | 9.5   | 19.8 | 19.6 | 1 | 0   | 489 |
| 6 April | 4 | 8.46 | 49.8 | 22.9 | 20.9 | 9.5   | 19.8 | 19.6 | 1 | 0   | 489 |
| 6 April | 4 | 8.46 | 49.8 | 22.9 | 20.9 | 9.5   | 19.8 | 19.6 | 1 | 0   | 489 |
| 6 April | 4 | 8.46 | 49.8 | 22.9 | 20.9 | 9.5   | 19.8 | 19.6 | 1 | 0   | 489 |
| 13      |   |      |      |      |      |       |      |      |   |     |     |
| April   | 4 | 8.48 | 53.8 | 25.6 | 23.9 | 14.89 | 25.1 | 25.3 | 1 | 0   | 691 |
| 13      |   |      |      |      |      |       |      |      |   |     |     |
| April   | 4 | 8.48 | 53.8 | 25.6 | 23.9 | 14.89 | 25.1 | 25.3 | 1 | 0   | 691 |
| 13      |   |      |      |      |      |       |      |      |   |     |     |
| April   | 4 | 8.48 | 53.8 | 25.6 | 23.9 | 14.89 | 25.1 | 25.3 | 1 | 0   | 691 |
| 13      |   |      |      |      |      |       |      |      |   |     |     |
| April   | 4 | 8.48 | 53.8 | 25.6 | 23.9 | 14.89 | 25.1 | 25.3 | 1 | 0   | 691 |
| 13      |   |      |      |      |      |       |      |      |   |     |     |
| April   | 4 | 8.48 | 53.8 | 25.6 | 23.9 | 14.89 | 25.1 | 25.3 | 1 | 0   | 691 |
| 20      |   |      |      |      |      |       |      |      |   |     |     |
| April   | 4 | 8.61 | 44.8 | 27.2 | 24.2 | 16.8  | 26.6 | 28.1 | 0 | 0   | 762 |
| 20      |   |      |      |      |      |       |      |      |   |     |     |
| April   | 4 | 8.61 | 44.8 | 27.2 | 24.2 | 16.8  | 26.6 | 28.1 | 0 | 0   | 762 |
| 20      |   |      |      |      |      |       |      |      |   |     |     |
| April   | 4 | 8.61 | 44.8 | 27.2 | 24.2 | 16.8  | 26.6 | 28.1 | 0 | 0   | 762 |
| 20      |   |      |      |      |      |       |      |      |   |     |     |
| April   | 4 | 8.61 | 44.8 | 27.2 | 24.2 | 16.8  | 26.6 | 28.1 | 0 | 0   | 762 |
| 20      |   |      |      |      |      |       |      |      |   |     |     |
| April   | 4 | 8.61 | 44.8 | 27.2 | 24.2 | 16.8  | 26.6 | 28.1 | 0 | 0   | 762 |
| 27      |   |      |      |      |      |       |      |      |   |     |     |
| April   | 4 | 8.49 | 59.8 | 31.1 | 29   | 22.4  | 28.7 | 27.8 | 1 | 0   | 449 |
| 27      |   |      |      |      |      |       |      |      |   |     |     |
| April   | 4 | 8.49 | 59.8 | 31.1 | 29   | 22.4  | 28.7 | 27.8 | 1 | 0   | 449 |
| 27      |   |      |      |      |      |       |      |      |   |     |     |
| April   | 4 | 8.49 | 59.8 | 31.1 | 29   | 22.4  | 28.7 | 27.8 | 1 | 0   | 449 |
| 27      |   |      |      |      |      |       |      |      |   |     |     |
| April   | 4 | 8.49 | 59.8 | 31.1 | 29   | 22.4  | 28.7 | 27.8 | 1 | 0   | 449 |
| 27      |   |      |      |      |      |       |      |      |   |     |     |
| April   | 4 | 8.49 | 59.8 | 31.1 | 29   | 22.4  | 28.7 | 27.8 | 1 | 0   | 449 |
| 6 April | 5 | 8.36 | 51.5 | 21.1 | 20.8 | 9.2   | 21   | 19.7 | 1 | 0   | 204 |
| 6 April | 5 | 8.36 | 51.5 | 21.1 | 20.8 | 9.2   | 21   | 19.7 | 1 | 0   | 204 |
| 6 April | 5 | 8.36 | 51.5 | 21.1 | 20.8 | 9.2   | 21   | 19.7 | 1 | 0   | 204 |
| 6 April | 5 | 8.36 | 51.5 | 21.1 | 20.8 | 9.2   | 21   | 19.7 | 1 | 0   | 204 |
| 6 April | 5 | 8.36 | 51.5 | 21.1 | 20.8 | 9.2   | 21   | 19.7 | 1 | 0   | 204 |
| 13      |   |      |      |      |      |       |      |      |   |     |     |
| April   | 5 | 8.49 | 39.5 | 24.9 | 23.7 | 14.76 | 24.3 | 22.9 | 1 | 0.2 | 732 |
| 13      |   |      |      |      |      |       |      |      |   |     |     |
| April   | 5 | 8.49 | 39.5 | 24.9 | 23.7 | 14.76 | 24.3 | 22.9 | 1 | 0.2 | 732 |
| 13      |   |      |      |      |      |       |      |      |   |     |     |
| April   | 5 | 8.49 | 39.5 | 24.9 | 23.7 | 14.76 | 24.3 | 22.9 | 1 | 0.2 | 732 |
| 13      |   |      |      |      |      |       |      |      |   |     |     |
| April   | 5 | 8.49 | 39.5 | 24.9 | 23.7 | 14.76 | 24.3 | 22.9 | 1 | 0.2 | 732 |

|           |   |      |      |      |      |       |      |      |   |     |     |
|-----------|---|------|------|------|------|-------|------|------|---|-----|-----|
| 13        |   |      |      |      |      |       |      |      |   |     |     |
| April 20  | 5 | 8.49 | 39.5 | 24.9 | 23.7 | 14.76 | 24.3 | 22.9 | 1 | 0.2 | 732 |
| April 20  | 5 | 8.44 | 22.3 | 26.5 | 25.1 | 16.9  | 27.5 | 26.9 | 0 | 0   | 235 |
| April 20  | 5 | 8.44 | 22.3 | 26.5 | 25.1 | 16.9  | 27.5 | 26.9 | 0 | 0   | 235 |
| April 20  | 5 | 8.44 | 22.3 | 26.5 | 25.1 | 16.9  | 27.5 | 26.9 | 0 | 0   | 235 |
| April 20  | 5 | 8.44 | 22.3 | 26.5 | 25.1 | 16.9  | 27.5 | 26.9 | 0 | 0   | 235 |
| April 20  | 5 | 8.44 | 22.3 | 26.5 | 25.1 | 16.9  | 27.5 | 26.9 | 0 | 0   | 235 |
| April 27  | 5 | 8.45 | 56.2 | 29.8 | 28.6 | 22.51 | 27.5 | 27.5 | 0 | 0   | 548 |
| April 27  | 5 | 8.45 | 56.2 | 29.8 | 28.6 | 22.51 | 27.5 | 27.5 | 0 | 0   | 548 |
| April 27  | 5 | 8.45 | 56.2 | 29.8 | 28.6 | 22.51 | 27.5 | 27.5 | 0 | 0   | 548 |
| April 27  | 5 | 8.45 | 56.2 | 29.8 | 28.6 | 22.51 | 27.5 | 27.5 | 0 | 0   | 548 |
| April 27  | 5 | 8.45 | 56.2 | 29.8 | 28.6 | 22.51 | 27.5 | 27.5 | 0 | 0   | 548 |
| 6 April 6 | 6 | 8.24 | 34.1 | 21.9 | 21.7 | 9.7   | 22.4 | 20.1 | 1 | 1   | 501 |
| 6 April 6 | 6 | 8.24 | 34.1 | 21.9 | 21.7 | 9.7   | 22.4 | 20.1 | 1 | 1   | 501 |
| 6 April 6 | 6 | 8.24 | 34.1 | 21.9 | 21.7 | 9.7   | 22.4 | 20.1 | 1 | 1   | 501 |
| 6 April 6 | 6 | 8.24 | 34.1 | 21.9 | 21.7 | 9.7   | 22.4 | 20.1 | 1 | 1   | 501 |
| 6 April 6 | 6 | 8.24 | 34.1 | 21.9 | 21.7 | 9.7   | 22.4 | 20.1 | 1 | 1   | 501 |
| 13        |   |      |      |      |      |       |      |      |   |     |     |
| April 13  | 6 | 8.23 | 47.9 | 24.3 | 24.4 | 14.45 | 24.4 | 22.8 | 1 | 0.5 | 371 |
| April 13  | 6 | 8.23 | 47.9 | 24.3 | 24.4 | 14.45 | 24.4 | 22.8 | 1 | 0.5 | 371 |
| April 13  | 6 | 8.23 | 47.9 | 24.3 | 24.4 | 14.45 | 24.4 | 22.8 | 1 | 0.5 | 371 |
| April 13  | 6 | 8.23 | 47.9 | 24.3 | 24.4 | 14.45 | 24.4 | 22.8 | 1 | 0.5 | 371 |
| April 20  | 6 | 8.23 | 47.9 | 24.3 | 24.4 | 14.45 | 24.4 | 22.8 | 1 | 0.5 | 371 |
| April 20  | 6 | 8.14 | 43.1 | 25.3 | 24.7 | 17    | 27.3 | 26.7 | 1 | 0.2 | 486 |
| April 20  | 6 | 8.14 | 43.1 | 25.3 | 24.7 | 17    | 27.3 | 26.7 | 1 | 0.2 | 486 |
| April 20  | 6 | 8.14 | 43.1 | 25.3 | 24.7 | 17    | 27.3 | 26.7 | 1 | 0.2 | 486 |
| April 20  | 6 | 8.14 | 43.1 | 25.3 | 24.7 | 17    | 27.3 | 26.7 | 1 | 0.2 | 486 |
| April 27  | 6 | 8.14 | 43.1 | 25.3 | 24.7 | 17    | 27.3 | 26.7 | 1 | 0.2 | 486 |
| April 27  | 6 | 8.29 | 54.1 | 27.7 | 26.7 | 21    | 25.4 | 26.3 | 0 | 0   | 489 |
| April     | 6 | 8.29 | 54.1 | 27.7 | 26.7 | 21    | 25.4 | 26.3 | 0 | 0   | 489 |

|         |   |      |      |      |      |       |      |      |   |     |     |
|---------|---|------|------|------|------|-------|------|------|---|-----|-----|
| 27      |   |      |      |      |      |       |      |      |   |     |     |
| April   | 6 | 8.29 | 54.1 | 27.7 | 26.7 | 21    | 25.4 | 26.3 | 0 | 0   | 489 |
| 27      |   |      |      |      |      |       |      |      |   |     |     |
| April   | 6 | 8.29 | 54.1 | 27.7 | 26.7 | 21    | 25.4 | 26.3 | 0 | 0   | 489 |
| 27      |   |      |      |      |      |       |      |      |   |     |     |
| April   | 6 | 8.29 | 54.1 | 27.7 | 26.7 | 21    | 25.4 | 26.3 | 0 | 0   | 489 |
| 6 April | 7 | 8.28 | 44.8 | 18.3 | 20.4 | 12.6  | 20   | 19.4 | 5 | 1   | 321 |
| 6 April | 7 | 8.28 | 44.8 | 18.3 | 20.4 | 12.6  | 20   | 19.4 | 5 | 1   | 321 |
| 6 April | 7 | 8.28 | 44.8 | 18.3 | 20.4 | 12.6  | 20   | 19.4 | 5 | 1   | 321 |
| 6 April | 7 | 8.28 | 44.8 | 18.3 | 20.4 | 12.6  | 20   | 19.4 | 5 | 1   | 321 |
| 6 April | 7 | 8.28 | 44.8 | 18.3 | 20.4 | 12.6  | 20   | 19.4 | 5 | 1   | 321 |
| 13      |   |      |      |      |      |       |      |      |   |     |     |
| April   | 7 | 8.34 | 49.8 | 22.5 | 23.7 | 14.62 | 22.3 | 22.7 | 5 | 0.2 | 417 |
| 13      |   |      |      |      |      |       |      |      |   |     |     |
| April   | 7 | 8.34 | 49.8 | 22.5 | 23.7 | 14.62 | 22.3 | 22.7 | 5 | 0.2 | 417 |
| 13      |   |      |      |      |      |       |      |      |   |     |     |
| April   | 7 | 8.34 | 49.8 | 22.5 | 23.7 | 14.62 | 22.3 | 22.7 | 5 | 0.2 | 417 |
| 13      |   |      |      |      |      |       |      |      |   |     |     |
| April   | 7 | 8.34 | 49.8 | 22.5 | 23.7 | 14.62 | 22.3 | 22.7 | 5 | 0.2 | 417 |
| 13      |   |      |      |      |      |       |      |      |   |     |     |
| April   | 7 | 8.34 | 49.8 | 22.5 | 23.7 | 14.62 | 22.3 | 22.7 | 5 | 0.2 | 417 |
| 20      |   |      |      |      |      |       |      |      |   |     |     |
| April   | 7 | 8.18 | 51.8 | 23.1 | 24.2 | 17.13 | 23.1 | 22.9 | 3 | 0.2 | 364 |
| 20      |   |      |      |      |      |       |      |      |   |     |     |
| April   | 7 | 8.18 | 51.8 | 23.1 | 24.2 | 17.13 | 23.1 | 22.9 | 3 | 0.2 | 364 |
| 20      |   |      |      |      |      |       |      |      |   |     |     |
| April   | 7 | 8.18 | 51.8 | 23.1 | 24.2 | 17.13 | 23.1 | 22.9 | 3 | 0.2 | 364 |
| 20      |   |      |      |      |      |       |      |      |   |     |     |
| April   | 7 | 8.18 | 51.8 | 23.1 | 24.2 | 17.13 | 23.1 | 22.9 | 3 | 0.2 | 364 |
| 20      |   |      |      |      |      |       |      |      |   |     |     |
| April   | 7 | 8.18 | 51.8 | 23.1 | 24.2 | 17.13 | 23.1 | 22.9 | 3 | 0.2 | 364 |
| 27      |   |      |      |      |      |       |      |      |   |     |     |
| April   | 7 | 7.94 | 60.3 | 26.3 | 26.4 | 17.5  | 26.3 | 23.5 | 0 | 0   | 356 |
| 27      |   |      |      |      |      |       |      |      |   |     |     |
| April   | 7 | 7.94 | 60.3 | 26.3 | 26.4 | 17.5  | 26.3 | 23.5 | 0 | 0   | 356 |
| 27      |   |      |      |      |      |       |      |      |   |     |     |
| April   | 7 | 7.94 | 60.3 | 26.3 | 26.4 | 17.5  | 26.3 | 23.5 | 0 | 0   | 356 |
| 27      |   |      |      |      |      |       |      |      |   |     |     |
| April   | 7 | 7.94 | 60.3 | 26.3 | 26.4 | 17.5  | 26.3 | 23.5 | 0 | 0   | 356 |
| 27      |   |      |      |      |      |       |      |      |   |     |     |
| April   | 7 | 7.94 | 60.3 | 26.3 | 26.4 | 17.5  | 26.3 | 23.5 | 0 | 0   | 356 |
| 6 April | 8 | 8.01 | 45.3 | 19.3 | 21.3 | 11.98 | 21.7 | 24.2 | 5 | 0.5 | 870 |
| 6 April | 8 | 8.01 | 45.3 | 19.3 | 21.3 | 11.98 | 21.7 | 24.2 | 5 | 0.5 | 870 |
| 6 April | 8 | 8.01 | 45.3 | 19.3 | 21.3 | 11.98 | 21.7 | 24.2 | 5 | 0.5 | 870 |
| 6 April | 8 | 8.01 | 45.3 | 19.3 | 21.3 | 11.98 | 21.7 | 24.2 | 5 | 0.5 | 870 |
| 6 April | 8 | 8.01 | 45.3 | 19.3 | 21.3 | 11.98 | 21.7 | 24.2 | 5 | 0.5 | 870 |
| 13      |   |      |      |      |      |       |      |      |   |     |     |
| April   | 8 | 8.20 | 48.3 | 22.3 | 23.8 | 14.19 | 21.7 | 23.3 | 5 | 0.2 | 624 |
| 13      |   |      |      |      |      |       |      |      |   |     |     |
| April   | 8 | 8.20 | 48.3 | 22.3 | 23.8 | 14.19 | 21.7 | 23.3 | 5 | 0.2 | 624 |

|          |   |      |      |      |      |       |      |      |   |     |     |
|----------|---|------|------|------|------|-------|------|------|---|-----|-----|
| 13       |   |      |      |      |      |       |      |      |   |     |     |
| April 13 | 8 | 8.20 | 48.3 | 22.3 | 23.8 | 14.19 | 21.7 | 23.3 | 5 | 0.2 | 624 |
| April 13 | 8 | 8.20 | 48.3 | 22.3 | 23.8 | 14.19 | 21.7 | 23.3 | 5 | 0.2 | 624 |
| April 20 | 8 | 8.20 | 48.3 | 22.3 | 23.8 | 14.19 | 21.7 | 23.3 | 5 | 0.2 | 624 |
| April 20 | 8 | 7.9  | 37.4 | 22.9 | 24.4 | 17.03 | 22.2 | 22.7 | 5 | 0.2 | 479 |
| April 20 | 8 | 7.9  | 37.4 | 22.9 | 24.4 | 17.03 | 22.2 | 22.7 | 5 | 0.2 | 479 |
| April 20 | 8 | 7.9  | 37.4 | 22.9 | 24.4 | 17.03 | 22.2 | 22.7 | 5 | 0.2 | 479 |
| April 20 | 8 | 7.9  | 37.4 | 22.9 | 24.4 | 17.03 | 22.2 | 22.7 | 5 | 0.2 | 479 |
| April 27 | 8 | 7.9  | 37.4 | 22.9 | 24.4 | 17.03 | 22.2 | 22.7 | 5 | 0.2 | 479 |
| April 27 | 8 | 7.96 | 53.7 | 24.1 | 24.8 | 21.9  | 24   | 23.6 | 0 | 0   | 884 |
| April 27 | 8 | 7.96 | 53.7 | 24.1 | 24.8 | 21.9  | 24   | 23.6 | 0 | 0   | 884 |
| April 27 | 8 | 7.96 | 53.7 | 24.1 | 24.8 | 21.9  | 24   | 23.6 | 0 | 0   | 884 |
| April 27 | 8 | 7.96 | 53.7 | 24.1 | 24.8 | 21.9  | 24   | 23.6 | 0 | 0   | 884 |
| April 27 | 8 | 7.96 | 53.7 | 24.1 | 24.8 | 21.9  | 24   | 23.6 | 0 | 0   | 884 |
| 4 May    | 1 | 8.23 | 55.3 | 33.3 | 33.4 | 25.3  | 32.5 | 32.2 | 0 | 0   | 423 |
| 4 May    | 1 | 8.23 | 55.3 | 33.3 | 33.4 | 25.3  | 32.5 | 32.2 | 0 | 0   | 423 |
| 4 May    | 1 | 8.23 | 55.3 | 33.3 | 33.4 | 25.3  | 32.5 | 32.2 | 0 | 0   | 423 |
| 4 May    | 1 | 8.23 | 55.3 | 33.3 | 33.4 | 25.3  | 32.5 | 32.2 | 0 | 0   | 423 |
| 4 May    | 1 | 8.23 | 55.3 | 33.3 | 33.4 | 25.3  | 32.5 | 32.2 | 0 | 0   | 423 |
| 11 May   | 1 | 7.21 | 38.5 | 33.2 | 33.4 | 20.5  | 32.2 | 32.6 | 0 | 0   | 784 |
| 11 May   | 1 | 7.21 | 38.5 | 33.2 | 33.4 | 20.5  | 32.2 | 32.6 | 0 | 0   | 784 |
| 11 May   | 1 | 7.21 | 38.5 | 33.2 | 33.4 | 20.5  | 32.2 | 32.6 | 0 | 0   | 784 |
| 11 May   | 1 | 7.21 | 38.5 | 33.2 | 33.4 | 20.5  | 32.2 | 32.6 | 0 | 0   | 784 |
| 11 May   | 1 | 7.21 | 38.5 | 33.2 | 33.4 | 20.5  | 32.2 | 32.6 | 0 | 0   | 784 |
| 4 May    | 2 | 8.22 | 52.7 | 32.1 | 32.5 | 25.1  | 32.1 | 32.2 | 0 | 0   | 468 |
| 4 May    | 2 | 8.22 | 52.7 | 32.1 | 32.5 | 25.1  | 32.1 | 32.2 | 0 | 0   | 468 |
| 4 May    | 2 | 8.22 | 52.7 | 32.1 | 32.5 | 25.1  | 32.1 | 32.2 | 0 | 0   | 468 |
| 4 May    | 2 | 8.22 | 52.7 | 32.1 | 32.5 | 25.1  | 32.1 | 32.2 | 0 | 0   | 468 |
| 4 May    | 2 | 8.22 | 52.7 | 32.1 | 32.5 | 25.1  | 32.1 | 32.2 | 0 | 0   | 468 |
| 11 May   | 2 | 8.19 | 38.6 | 32.4 | 32.6 | 20.4  | 31.6 | 31.9 | 0 | 0   | 764 |
| 11 May   | 2 | 8.19 | 38.6 | 32.4 | 32.6 | 20.4  | 31.6 | 31.9 | 0 | 0   | 764 |

|           |   |      |      |      |      |       |      |      |   |     |     |
|-----------|---|------|------|------|------|-------|------|------|---|-----|-----|
| 11        |   |      |      |      |      |       |      |      |   |     |     |
| May 11    | 2 | 8.19 | 38.6 | 32.4 | 32.6 | 20.4  | 31.6 | 31.9 | 0 | 0   | 764 |
| May 11    | 2 | 8.19 | 38.6 | 32.4 | 32.6 | 20.4  | 31.6 | 31.9 | 0 | 0   | 764 |
| May 4 May | 2 | 8.19 | 38.6 | 32.4 | 32.6 | 20.4  | 31.6 | 31.9 | 0 | 0   | 764 |
| 4 May     | 3 | 8.13 | 50.3 | 31.1 | 31.9 | 25.3  | 31.2 | 30.2 | 0 | 0   | 856 |
| 4 May     | 3 | 8.13 | 50.3 | 31.1 | 31.9 | 25.3  | 31.2 | 30.2 | 0 | 0   | 856 |
| 4 May     | 3 | 8.13 | 50.3 | 31.1 | 31.9 | 25.3  | 31.2 | 30.2 | 0 | 0   | 856 |
| 4 May     | 3 | 8.13 | 50.3 | 31.1 | 31.9 | 25.3  | 31.2 | 30.2 | 0 | 0   | 856 |
| 4 May     | 3 | 8.13 | 50.3 | 31.1 | 31.9 | 25.3  | 31.2 | 30.2 | 0 | 0   | 856 |
| 11        |   |      |      |      |      |       |      |      |   |     |     |
| May 11    | 3 | 8.12 | 42.2 | 30.1 | 30.9 | 20.6  | 31.4 | 31.8 | 0 | 0   | 841 |
| May 11    | 3 | 8.12 | 42.2 | 30.1 | 30.9 | 20.6  | 31.4 | 31.8 | 0 | 0   | 841 |
| May 11    | 3 | 8.12 | 42.2 | 30.1 | 30.9 | 20.6  | 31.4 | 31.8 | 0 | 0   | 841 |
| May 11    | 3 | 8.12 | 42.2 | 30.1 | 30.9 | 20.6  | 31.4 | 31.8 | 0 | 0   | 841 |
| May 11    | 3 | 8.12 | 42.2 | 30.1 | 30.9 | 20.6  | 31.4 | 31.8 | 0 | 0   | 841 |
| May 18    | 3 | 8.12 | 55.7 | 28.8 | 29.3 | 24.94 | 29   | 29.2 | 3 | 0   | 918 |
| May 18    | 3 | 8.12 | 55.7 | 28.8 | 29.3 | 24.94 | 29   | 29.2 | 3 | 0   | 918 |
| May 18    | 3 | 8.12 | 55.7 | 28.8 | 29.3 | 24.94 | 29   | 29.2 | 3 | 0   | 918 |
| May 18    | 3 | 8.12 | 55.7 | 28.8 | 29.3 | 24.94 | 29   | 29.2 | 3 | 0   | 918 |
| May 18    | 3 | 8.12 | 55.7 | 28.8 | 29.3 | 24.94 | 29   | 29.2 | 3 | 0   | 918 |
| May 25    | 3 | 8.21 | 60.5 | 29.1 | 30.4 | 19.2  | 30.2 | 31.8 | 3 | 0   | 187 |
| May 25    | 3 | 8.21 | 60.5 | 29.1 | 30.4 | 19.2  | 30.2 | 31.8 | 3 | 0   | 187 |
| May 25    | 3 | 8.21 | 60.5 | 29.1 | 30.4 | 19.2  | 30.2 | 31.8 | 3 | 0   | 187 |
| May 25    | 3 | 8.21 | 60.5 | 29.1 | 30.4 | 19.2  | 30.2 | 31.8 | 3 | 0   | 187 |
| May 25    | 3 | 8.21 | 60.5 | 29.1 | 30.4 | 19.2  | 30.2 | 31.8 | 3 | 0   | 187 |
| 4 May     | 4 | 8.41 | 59.5 | 29.9 | 29.9 | 25.2  | 28.2 | 28.1 | 0 | 0.2 | 842 |
| 4 May     | 4 | 8.41 | 59.5 | 29.9 | 29.9 | 25.2  | 28.2 | 28.1 | 0 | 0.2 | 842 |
| 4 May     | 4 | 8.41 | 59.5 | 29.9 | 29.9 | 25.2  | 28.2 | 28.1 | 0 | 0.2 | 842 |
| 4 May     | 4 | 8.41 | 59.5 | 29.9 | 29.9 | 25.2  | 28.2 | 28.1 | 0 | 0.2 | 842 |
| 4 May     | 4 | 8.41 | 59.5 | 29.9 | 29.9 | 25.2  | 28.2 | 28.1 | 0 | 0.2 | 842 |
| 11        |   |      |      |      |      |       |      |      |   |     |     |
| May 11    | 4 | 8.39 | 39.5 | 29.7 | 30.4 | 20.9  | 29.4 | 30.4 | 1 | 0.2 | 492 |
| May 11    | 4 | 8.39 | 39.5 | 29.7 | 30.4 | 20.9  | 29.4 | 30.4 | 1 | 0.2 | 492 |

|        |   |      |      |      |      |       |      |      |   |     |      |
|--------|---|------|------|------|------|-------|------|------|---|-----|------|
| 11     |   |      |      |      |      |       |      |      |   |     |      |
| May 11 | 4 | 8.39 | 39.5 | 29.7 | 30.4 | 20.9  | 29.4 | 30.4 | 1 | 0.2 | 492  |
| May 11 | 4 | 8.39 | 39.5 | 29.7 | 30.4 | 20.9  | 29.4 | 30.4 | 1 | 0.2 | 492  |
| May 18 | 4 | 8.39 | 39.5 | 29.7 | 30.4 | 20.9  | 29.4 | 30.4 | 1 | 0.2 | 492  |
| May 18 | 4 | 8.27 | 60   | 27.7 | 27.9 | 22.47 | 26.6 | 26.9 | 0 | 0   | 185  |
| May 18 | 4 | 8.27 | 60   | 27.7 | 27.9 | 22.47 | 26.6 | 26.9 | 0 | 0   | 185  |
| May 18 | 4 | 8.27 | 60   | 27.7 | 27.9 | 22.47 | 26.6 | 26.9 | 0 | 0   | 185  |
| May 18 | 4 | 8.27 | 60   | 27.7 | 27.9 | 22.47 | 26.6 | 26.9 | 0 | 0   | 185  |
| May 18 | 4 | 8.27 | 60   | 27.7 | 27.9 | 22.47 | 26.6 | 26.9 | 0 | 0   | 185  |
| May 25 | 4 | 8.59 | 68.4 | 29.5 | 30.2 | 19.3  | 29.4 | 30.2 | 3 | 0   | 264  |
| May 25 | 4 | 8.59 | 68.4 | 29.5 | 30.2 | 19.3  | 29.4 | 30.2 | 3 | 0   | 264  |
| May 25 | 4 | 8.59 | 68.4 | 29.5 | 30.2 | 19.3  | 29.4 | 30.2 | 3 | 0   | 264  |
| May 25 | 4 | 8.59 | 68.4 | 29.5 | 30.2 | 19.3  | 29.4 | 30.2 | 3 | 0   | 264  |
| May 25 | 4 | 8.59 | 68.4 | 29.5 | 30.2 | 19.3  | 29.4 | 30.2 | 3 | 0   | 264  |
| 4 May  | 5 | 8.35 | 72.3 | 31.6 | 29.8 | 25    | 28.3 | 28.6 | 1 | 0.2 | 541  |
| 4 May  | 5 | 8.35 | 72.3 | 31.6 | 29.8 | 25    | 28.3 | 28.6 | 1 | 0.2 | 541  |
| 4 May  | 5 | 8.35 | 72.3 | 31.6 | 29.8 | 25    | 28.3 | 28.6 | 1 | 0.2 | 541  |
| 4 May  | 5 | 8.35 | 72.3 | 31.6 | 29.8 | 25    | 28.3 | 28.6 | 1 | 0.2 | 541  |
| 4 May  | 5 | 8.35 | 72.3 | 31.6 | 29.8 | 25    | 28.3 | 28.6 | 1 | 0.2 | 541  |
| May 11 | 5 | 8.34 | 38.4 | 30.1 | 30.9 | 21.3  | 29.1 | 30.5 | 1 | 0.2 | 814  |
| May 11 | 5 | 8.34 | 38.4 | 30.1 | 30.9 | 21.3  | 29.1 | 30.5 | 1 | 0.2 | 814  |
| May 11 | 5 | 8.34 | 38.4 | 30.1 | 30.9 | 21.3  | 29.1 | 30.5 | 1 | 0.2 | 814  |
| May 11 | 5 | 8.34 | 38.4 | 30.1 | 30.9 | 21.3  | 29.1 | 30.5 | 1 | 0.2 | 814  |
| May 18 | 5 | 8.34 | 38.4 | 30.1 | 30.9 | 21.3  | 29.1 | 30.5 | 1 | 0.2 | 814  |
| May 18 | 5 | 8.28 | 51.2 | 28.6 | 28.4 | 25.32 | 25   | 25.2 | 0 | 0   | 1006 |
| May 18 | 5 | 8.28 | 51.2 | 28.6 | 28.4 | 25.32 | 25   | 25.2 | 0 | 0   | 1006 |
| May 18 | 5 | 8.28 | 51.2 | 28.6 | 28.4 | 25.32 | 25   | 25.2 | 0 | 0   | 1006 |
| May 18 | 5 | 8.28 | 51.2 | 28.6 | 28.4 | 25.32 | 25   | 25.2 | 0 | 0   | 1006 |
| May    | 5 | 8.28 | 51.2 | 28.6 | 28.4 | 25.32 | 25   | 25.2 | 0 | 0   | 1006 |

|        |   |      |      |      |      |       |      |      |   |     |      |
|--------|---|------|------|------|------|-------|------|------|---|-----|------|
| 25     |   |      |      |      |      |       |      |      |   |     |      |
| May 25 | 5 | 8.49 | 67.9 | 29.2 | 29.5 | 20.9  | 29.7 | 31.5 | 0 | 0   | 356  |
| May 25 | 5 | 8.49 | 67.9 | 29.2 | 29.5 | 20.9  | 29.7 | 31.5 | 0 | 0   | 356  |
| May 25 | 5 | 8.49 | 67.9 | 29.2 | 29.5 | 20.9  | 29.7 | 31.5 | 0 | 0   | 356  |
| May 25 | 5 | 8.49 | 67.9 | 29.2 | 29.5 | 20.9  | 29.7 | 31.5 | 0 | 0   | 356  |
| May 25 | 5 | 8.49 | 67.9 | 29.2 | 29.5 | 20.9  | 29.7 | 31.5 | 0 | 0   | 356  |
| 4 May  | 6 | 7.69 | 35.5 | 29.1 | 29.6 | 25.1  | 28.6 | 28.5 | 1 | 0.2 | 365  |
| 4 May  | 6 | 7.69 | 35.5 | 29.1 | 29.6 | 25.1  | 28.6 | 28.5 | 1 | 0.2 | 365  |
| 4 May  | 6 | 7.69 | 35.5 | 29.1 | 29.6 | 25.1  | 28.6 | 28.5 | 1 | 0.2 | 365  |
| 4 May  | 6 | 7.69 | 35.5 | 29.1 | 29.6 | 25.1  | 28.6 | 28.5 | 1 | 0.2 | 365  |
| 4 May  | 6 | 7.69 | 35.5 | 29.1 | 29.6 | 25.1  | 28.6 | 28.5 | 1 | 0.2 | 365  |
| 11     |   |      |      |      |      |       |      |      |   |     |      |
| May 11 | 6 | 7.62 | 42.3 | 29.8 | 30.4 | 21.4  | 28.4 | 28.9 | 1 | 0.2 | 864  |
| May 11 | 6 | 7.62 | 42.3 | 29.8 | 30.4 | 21.4  | 28.4 | 28.9 | 1 | 0.2 | 864  |
| May 11 | 6 | 7.62 | 42.3 | 29.8 | 30.4 | 21.4  | 28.4 | 28.9 | 1 | 0.2 | 864  |
| May 11 | 6 | 7.62 | 42.3 | 29.8 | 30.4 | 21.4  | 28.4 | 28.9 | 1 | 0.2 | 864  |
| May 11 | 6 | 7.62 | 42.3 | 29.8 | 30.4 | 21.4  | 28.4 | 28.9 | 1 | 0.2 | 864  |
| May 18 | 6 | 7.94 | 53.6 | 28.7 | 26.5 | 26.08 | 27.3 | 28.1 | 3 | 0.2 | 1479 |
| May 18 | 6 | 7.94 | 53.6 | 28.7 | 26.5 | 26.08 | 27.3 | 28.1 | 3 | 0.2 | 1479 |
| May 18 | 6 | 7.94 | 53.6 | 28.7 | 26.5 | 26.08 | 27.3 | 28.1 | 3 | 0.2 | 1479 |
| May 18 | 6 | 7.94 | 53.6 | 28.7 | 26.5 | 26.08 | 27.3 | 28.1 | 3 | 0.2 | 1479 |
| May 18 | 6 | 7.94 | 53.6 | 28.7 | 26.5 | 26.08 | 27.3 | 28.1 | 3 | 0.2 | 1479 |
| May 25 | 6 | 8.15 | 69.1 | 28.4 | 27.9 | 18.7  | 25.3 | 26.4 | 3 | 0.2 | 840  |
| May 25 | 6 | 8.15 | 69.1 | 28.4 | 27.9 | 18.7  | 25.3 | 26.4 | 3 | 0.2 | 840  |
| May 25 | 6 | 8.15 | 69.1 | 28.4 | 27.9 | 18.7  | 25.3 | 26.4 | 3 | 0.2 | 840  |
| May 25 | 6 | 8.15 | 69.1 | 28.4 | 27.9 | 18.7  | 25.3 | 26.4 | 3 | 0.2 | 840  |
| 4 May  | 7 | 7.56 | 39.9 | 28   | 28.1 | 25.1  | 28.2 | 28.4 | 1 | 0   | 754  |
| 4 May  | 7 | 7.56 | 39.9 | 28   | 28.1 | 25.1  | 28.2 | 28.4 | 1 | 0   | 754  |
| 4 May  | 7 | 7.56 | 39.9 | 28   | 28.1 | 25.1  | 28.2 | 28.4 | 1 | 0   | 754  |
| 4 May  | 7 | 7.56 | 39.9 | 28   | 28.1 | 25.1  | 28.2 | 28.4 | 1 | 0   | 754  |
| 4 May  | 7 | 7.56 | 39.9 | 28   | 28.1 | 25.1  | 28.2 | 28.4 | 1 | 0   | 754  |

|        |   |      |      |      |      |       |      |      |   |     |      |
|--------|---|------|------|------|------|-------|------|------|---|-----|------|
| 11     |   |      |      |      |      |       |      |      |   |     |      |
| May 11 | 7 | 7.51 | 41.2 | 28.4 | 29.8 | 21.6  | 28.3 | 29.1 | 1 | 0   | 715  |
| May 11 | 7 | 7.51 | 41.2 | 28.4 | 29.8 | 21.6  | 28.3 | 29.1 | 1 | 0   | 715  |
| May 11 | 7 | 7.51 | 41.2 | 28.4 | 29.8 | 21.6  | 28.3 | 29.1 | 1 | 0   | 715  |
| May 11 | 7 | 7.51 | 41.2 | 28.4 | 29.8 | 21.6  | 28.3 | 29.1 | 1 | 0   | 715  |
| May 18 | 7 | 7.51 | 41.2 | 28.4 | 29.8 | 21.6  | 28.3 | 29.1 | 1 | 0   | 715  |
| May 18 | 7 | 7.62 | 54.3 | 26.3 | 25.1 | 24.32 | 24.4 | 27.8 | 1 | 0.2 | 560  |
| May 18 | 7 | 7.62 | 54.3 | 26.3 | 25.1 | 24.32 | 24.4 | 27.8 | 1 | 0.2 | 560  |
| May 18 | 7 | 7.62 | 54.3 | 26.3 | 25.1 | 24.32 | 24.4 | 27.8 | 1 | 0.2 | 560  |
| May 18 | 7 | 7.62 | 54.3 | 26.3 | 25.1 | 24.32 | 24.4 | 27.8 | 1 | 0.2 | 560  |
| May 25 | 7 | 7.62 | 54.3 | 26.3 | 25.1 | 24.32 | 24.4 | 27.8 | 1 | 0.2 | 560  |
| May 25 | 7 | 7.82 | 70.2 | 26.8 | 26.7 | 18.4  | 24.8 | 24.1 | 1 | 0.2 | 620  |
| May 25 | 7 | 7.82 | 70.2 | 26.8 | 26.7 | 18.4  | 24.8 | 24.1 | 1 | 0.2 | 620  |
| May 25 | 7 | 7.82 | 70.2 | 26.8 | 26.7 | 18.4  | 24.8 | 24.1 | 1 | 0.2 | 620  |
| May 25 | 7 | 7.82 | 70.2 | 26.8 | 26.7 | 18.4  | 24.8 | 24.1 | 1 | 0.2 | 620  |
| May 25 | 7 | 7.82 | 70.2 | 26.8 | 26.7 | 18.4  | 24.8 | 24.1 | 1 | 0.2 | 620  |
| 4 May  | 8 | 7.65 | 42.3 | 28.6 | 29.4 | 25.4  | 28.6 | 28.6 | 0 | 0   | 336  |
| 4 May  | 8 | 7.65 | 42.3 | 28.6 | 29.4 | 25.4  | 28.6 | 28.6 | 0 | 0   | 336  |
| 4 May  | 8 | 7.65 | 42.3 | 28.6 | 29.4 | 25.4  | 28.6 | 28.6 | 0 | 0   | 336  |
| 4 May  | 8 | 7.65 | 42.3 | 28.6 | 29.4 | 25.4  | 28.6 | 28.6 | 0 | 0   | 336  |
| 4 May  | 8 | 7.65 | 42.3 | 28.6 | 29.4 | 25.4  | 28.6 | 28.6 | 0 | 0   | 336  |
| May 11 | 8 | 7.63 | 40.3 | 28.5 | 29.7 | 22.5  | 28.6 | 29.4 | 0 | 0   | 668  |
| May 11 | 8 | 7.63 | 40.3 | 28.5 | 29.7 | 22.5  | 28.6 | 29.4 | 0 | 0   | 668  |
| May 11 | 8 | 7.63 | 40.3 | 28.5 | 29.7 | 22.5  | 28.6 | 29.4 | 0 | 0   | 668  |
| May 11 | 8 | 7.63 | 40.3 | 28.5 | 29.7 | 22.5  | 28.6 | 29.4 | 0 | 0   | 668  |
| May 18 | 8 | 7.63 | 40.3 | 28.5 | 29.7 | 22.5  | 28.6 | 29.4 | 0 | 0   | 668  |
| May 18 | 8 | 7.72 | 50.4 | 25.1 | 26.8 | 25.52 | 23.1 | 24.6 | 3 | 0.2 | 1830 |
| May 18 | 8 | 7.72 | 50.4 | 25.1 | 26.8 | 25.52 | 23.1 | 24.6 | 3 | 0.2 | 1830 |
| May    | 8 | 7.72 | 50.4 | 25.1 | 26.8 | 25.52 | 23.1 | 24.6 | 3 | 0.2 | 1830 |

|        |    |      |      |      |      |       |      |      |   |     |      |
|--------|----|------|------|------|------|-------|------|------|---|-----|------|
| 18     |    |      |      |      |      |       |      |      |   |     |      |
| May 18 | 8  | 7.72 | 50.4 | 25.1 | 26.8 | 25.52 | 23.1 | 24.6 | 3 | 0.2 | 1830 |
| May 25 | 8  | 7.72 | 50.4 | 25.1 | 26.8 | 25.52 | 23.1 | 24.6 | 3 | 0.2 | 1830 |
| May 25 | 8  | 7.89 | 62.7 | 25.7 | 26.8 | 17.6  | 16.5 | 18.3 | 5 | 0.2 | 156  |
| May 25 | 8  | 7.89 | 62.7 | 25.7 | 26.8 | 17.6  | 16.5 | 18.3 | 5 | 0.2 | 156  |
| May 25 | 8  | 7.89 | 62.7 | 25.7 | 26.8 | 17.6  | 16.5 | 18.3 | 5 | 0.2 | 156  |
| May 25 | 8  | 7.89 | 62.7 | 25.7 | 26.8 | 17.6  | 16.5 | 18.3 | 5 | 0.2 | 156  |
| May 25 | 8  | 7.89 | 62.7 | 25.7 | 26.8 | 17.6  | 16.5 | 18.3 | 5 | 0.2 | 156  |
| 4 May  | 9  | 7.33 | 48.6 | 27.2 | 27.1 | 25.2  | 27   | 27.5 | 0 | 0   | 1475 |
| 4 May  | 9  | 7.33 | 48.6 | 27.2 | 27.1 | 25.2  | 27   | 27.5 | 0 | 0   | 1475 |
| 4 May  | 9  | 7.33 | 48.6 | 27.2 | 27.1 | 25.2  | 27   | 27.5 | 0 | 0   | 1475 |
| 4 May  | 9  | 7.33 | 48.6 | 27.2 | 27.1 | 25.2  | 27   | 27.5 | 0 | 0   | 1475 |
| 4 May  | 9  | 7.33 | 48.6 | 27.2 | 27.1 | 25.2  | 27   | 27.5 | 0 | 0   | 1475 |
| 11     |    |      |      |      |      |       |      |      |   |     |      |
| May 11 | 9  | 7.35 | 38.4 | 27.1 | 27.9 | 22.4  | 27.3 | 27.9 | 0 | 0   | 497  |
| May 11 | 9  | 7.35 | 38.4 | 27.1 | 27.9 | 22.4  | 27.3 | 27.9 | 0 | 0   | 497  |
| May 11 | 9  | 7.35 | 38.4 | 27.1 | 27.9 | 22.4  | 27.3 | 27.9 | 0 | 0   | 497  |
| May 11 | 9  | 7.35 | 38.4 | 27.1 | 27.9 | 22.4  | 27.3 | 27.9 | 0 | 0   | 497  |
| May 11 | 9  | 7.35 | 38.4 | 27.1 | 27.9 | 22.4  | 27.3 | 27.9 | 0 | 0   | 497  |
| May 18 | 9  | 7.74 | 44.9 | 27.9 | 27   | 26.41 | 27.1 | 27.1 | 1 | 0.2 | 431  |
| May 18 | 9  | 7.74 | 44.9 | 27.9 | 27   | 26.41 | 27.1 | 27.1 | 1 | 0.2 | 431  |
| May 18 | 9  | 7.74 | 44.9 | 27.9 | 27   | 26.41 | 27.1 | 27.1 | 1 | 0.2 | 431  |
| May 18 | 9  | 7.74 | 44.9 | 27.9 | 27   | 26.41 | 27.1 | 27.1 | 1 | 0.2 | 431  |
| May 18 | 9  | 7.74 | 44.9 | 27.9 | 27   | 26.41 | 27.1 | 27.1 | 1 | 0.2 | 431  |
| May 25 | 9  | 7.58 | 60.8 | 27.3 | 27.5 | 19.2  | 24.6 | 27.2 | 3 | 0.2 | 152  |
| May 25 | 9  | 7.58 | 60.8 | 27.3 | 27.5 | 19.2  | 24.6 | 27.2 | 3 | 0.2 | 152  |
| May 25 | 9  | 7.58 | 60.8 | 27.3 | 27.5 | 19.2  | 24.6 | 27.2 | 3 | 0.2 | 152  |
| May 25 | 9  | 7.58 | 60.8 | 27.3 | 27.5 | 19.2  | 24.6 | 27.2 | 3 | 0.2 | 152  |
| May 25 | 9  | 7.58 | 60.8 | 27.3 | 27.5 | 19.2  | 24.6 | 27.2 | 3 | 0.2 | 152  |
| 4 May  | 10 | 7.21 | 42.1 | 26.1 | 26.5 | 25.2  | 26.1 | 26.4 | 0 | 0.2 | 753  |
| 4 May  | 10 | 7.21 | 42.1 | 26.1 | 26.5 | 25.2  | 26.1 | 26.4 | 0 | 0.2 | 753  |

|        |    |      |      |      |      |       |      |      |   |     |      |
|--------|----|------|------|------|------|-------|------|------|---|-----|------|
| 4 May  | 10 | 7.21 | 42.1 | 26.1 | 26.5 | 25.2  | 26.1 | 26.4 | 0 | 0.2 | 753  |
| 4 May  | 10 | 7.21 | 42.1 | 26.1 | 26.5 | 25.2  | 26.1 | 26.4 | 0 | 0.2 | 753  |
| 4 May  | 10 | 7.21 | 42.1 | 26.1 | 26.5 | 25.2  | 26.1 | 26.4 | 0 | 0.2 | 753  |
| 11     |    |      |      |      |      |       |      |      |   |     |      |
| May    | 10 | 7.19 | 43.2 | 26.4 | 26.9 | 22.9  | 26.4 | 26.8 | 0 | 0.2 | 597  |
| 11     |    |      |      |      |      |       |      |      |   |     |      |
| May    | 10 | 7.19 | 43.2 | 26.4 | 26.9 | 22.9  | 26.4 | 26.8 | 0 | 0.2 | 597  |
| 11     |    |      |      |      |      |       |      |      |   |     |      |
| May    | 10 | 7.19 | 43.2 | 26.4 | 26.9 | 22.9  | 26.4 | 26.8 | 0 | 0.2 | 597  |
| 11     |    |      |      |      |      |       |      |      |   |     |      |
| May    | 10 | 7.19 | 43.2 | 26.4 | 26.9 | 22.9  | 26.4 | 26.8 | 0 | 0.2 | 597  |
| 11     |    |      |      |      |      |       |      |      |   |     |      |
| May    | 10 | 7.19 | 43.2 | 26.4 | 26.9 | 22.9  | 26.4 | 26.8 | 0 | 0.2 | 597  |
| 18     |    |      |      |      |      |       |      |      |   |     |      |
| May    | 10 | 7.28 | 58.1 | 23.3 | 22.9 | 22.43 | 24.3 | 25.1 | 1 | 0.2 | 471  |
| 18     |    |      |      |      |      |       |      |      |   |     |      |
| May    | 10 | 7.28 | 58.1 | 23.3 | 22.9 | 22.43 | 24.3 | 25.1 | 1 | 0.2 | 471  |
| 18     |    |      |      |      |      |       |      |      |   |     |      |
| May    | 10 | 7.28 | 58.1 | 23.3 | 22.9 | 22.43 | 24.3 | 25.1 | 1 | 0.2 | 471  |
| 18     |    |      |      |      |      |       |      |      |   |     |      |
| May    | 10 | 7.28 | 58.1 | 23.3 | 22.9 | 22.43 | 24.3 | 25.1 | 1 | 0.2 | 471  |
| 18     |    |      |      |      |      |       |      |      |   |     |      |
| May    | 10 | 7.28 | 58.1 | 23.3 | 22.9 | 22.43 | 24.3 | 25.1 | 1 | 0.2 | 471  |
| 25     |    |      |      |      |      |       |      |      |   |     |      |
| May    | 10 | 8.02 | 65.8 | 25.4 | 24.9 | 19.5  | 20.4 | 23.9 | 1 | 0.2 | 263  |
| 25     |    |      |      |      |      |       |      |      |   |     |      |
| May    | 10 | 8.02 | 65.8 | 25.4 | 24.9 | 19.5  | 20.4 | 23.9 | 1 | 0.2 | 263  |
| 25     |    |      |      |      |      |       |      |      |   |     |      |
| May    | 10 | 8.02 | 65.8 | 25.4 | 24.9 | 19.5  | 20.4 | 23.9 | 1 | 0.2 | 263  |
| 25     |    |      |      |      |      |       |      |      |   |     |      |
| May    | 10 | 8.02 | 65.8 | 25.4 | 24.9 | 19.5  | 20.4 | 23.9 | 1 | 0.2 | 263  |
| 25     |    |      |      |      |      |       |      |      |   |     |      |
| May    | 10 | 8.02 | 65.8 | 25.4 | 24.9 | 19.5  | 20.4 | 23.9 | 1 | 0.2 | 263  |
| 1 June | 4  | 8.89 | 50.4 | 32.2 | 32.2 | 26.4  | 26.1 | 27.7 | 1 | 0   | 487  |
| 1 June | 4  | 8.89 | 50.4 | 32.2 | 32.2 | 26.4  | 26.1 | 27.7 | 1 | 0   | 487  |
| 1 June | 4  | 8.89 | 50.4 | 32.2 | 32.2 | 26.4  | 26.1 | 27.7 | 1 | 0   | 487  |
| 1 June | 4  | 8.89 | 50.4 | 32.2 | 32.2 | 26.4  | 26.1 | 27.7 | 1 | 0   | 487  |
| 1 June | 4  | 8.89 | 50.4 | 32.2 | 32.2 | 26.4  | 26.1 | 27.7 | 1 | 0   | 487  |
| 1 June | 4  | 8.89 | 50.4 | 32.2 | 32.2 | 26.4  | 26.1 | 27.7 | 1 | 0   | 487  |
| 8 June | 4  | 8.4  | 43.8 | 31.4 | 32.6 | 28.2  | 30.4 | 32.1 | 3 | 0   | 1264 |
| 8 June | 4  | 8.4  | 43.8 | 31.4 | 32.6 | 28.2  | 30.4 | 32.1 | 3 | 0   | 1264 |
| 8 June | 4  | 8.4  | 43.8 | 31.4 | 32.6 | 28.2  | 30.4 | 32.1 | 3 | 0   | 1264 |
| 8 June | 4  | 8.4  | 43.8 | 31.4 | 32.6 | 28.2  | 30.4 | 32.1 | 3 | 0   | 1264 |
| 8 June | 4  | 8.4  | 43.8 | 31.4 | 32.6 | 28.2  | 30.4 | 32.1 | 3 | 0   | 1264 |
| 15     |    |      |      |      |      |       |      |      |   |     |      |
| June   | 4  | 8.81 | 54.7 | 31.8 | 30.6 | 27.61 | 26.7 | 26.8 | 1 | 0   | 755  |
| 15     |    |      |      |      |      |       |      |      |   |     |      |
| June   | 4  | 8.81 | 54.7 | 31.8 | 30.6 | 27.61 | 26.7 | 26.8 | 1 | 0   | 755  |
| 15     |    |      |      |      |      |       |      |      |   |     |      |
| June   | 4  | 8.81 | 54.7 | 31.8 | 30.6 | 27.61 | 26.7 | 26.8 | 1 | 0   | 755  |

|         |   |      |      |      |      |       |      |      |   |     |      |
|---------|---|------|------|------|------|-------|------|------|---|-----|------|
| 15      |   |      |      |      |      |       |      |      |   |     |      |
| June 15 | 4 | 8.81 | 54.7 | 31.8 | 30.6 | 27.61 | 26.7 | 26.8 | 1 | 0   | 755  |
| June 22 | 4 | 8.81 | 54.7 | 31.8 | 30.6 | 27.61 | 26.7 | 26.8 | 1 | 0   | 755  |
| June 22 | 4 | 9.08 | 52.3 | 30.6 | 29.7 | 23.97 | 25.4 | 28.4 | 3 | 0.2 | 861  |
| June 22 | 4 | 9.08 | 52.3 | 30.6 | 29.7 | 23.97 | 25.4 | 28.4 | 3 | 0.2 | 861  |
| June 22 | 4 | 9.08 | 52.3 | 30.6 | 29.7 | 23.97 | 25.4 | 28.4 | 3 | 0.2 | 861  |
| June 22 | 4 | 9.08 | 52.3 | 30.6 | 29.7 | 23.97 | 25.4 | 28.4 | 3 | 0.2 | 861  |
| June 29 | 4 | 9.08 | 52.3 | 30.6 | 29.7 | 23.97 | 25.4 | 28.4 | 3 | 0.2 | 861  |
| June 29 | 4 | 9.08 | 57.6 | 29.8 | 28.4 | 23.81 | 24.8 | 27.1 | 3 | 0.2 | 1547 |
| June 29 | 4 | 9.08 | 57.6 | 29.8 | 28.4 | 23.81 | 24.8 | 27.1 | 3 | 0.2 | 1547 |
| June 29 | 4 | 9.08 | 57.6 | 29.8 | 28.4 | 23.81 | 24.8 | 27.1 | 3 | 0.2 | 1547 |
| June 29 | 4 | 9.08 | 57.6 | 29.8 | 28.4 | 23.81 | 24.8 | 27.1 | 3 | 0.2 | 1547 |
| June 29 | 4 | 9.08 | 57.6 | 29.8 | 28.4 | 23.81 | 24.8 | 27.1 | 3 | 0.2 | 1547 |
| 1 June  | 5 | 8.88 | 53.6 | 30.3 | 33.2 | 25.4  | 30.8 | 31.4 | 1 | 0   | 368  |
| 1 June  | 5 | 8.88 | 53.6 | 30.3 | 33.2 | 25.4  | 30.8 | 31.4 | 1 | 0   | 368  |
| 1 June  | 5 | 8.88 | 53.6 | 30.3 | 33.2 | 25.4  | 30.8 | 31.4 | 1 | 0   | 368  |
| 1 June  | 5 | 8.88 | 53.6 | 30.3 | 33.2 | 25.4  | 30.8 | 31.4 | 1 | 0   | 368  |
| 1 June  | 5 | 8.88 | 53.6 | 30.3 | 33.2 | 25.4  | 30.8 | 31.4 | 1 | 0   | 368  |
| 8 June  | 5 | 8.42 | 48.3 | 31.7 | 33.4 | 26.1  | 30.5 | 33   | 1 | 0.2 | 503  |
| 8 June  | 5 | 8.42 | 48.3 | 31.7 | 33.4 | 26.1  | 30.5 | 33   | 1 | 0.2 | 503  |
| 8 June  | 5 | 8.42 | 48.3 | 31.7 | 33.4 | 26.1  | 30.5 | 33   | 1 | 0.2 | 503  |
| 8 June  | 5 | 8.42 | 48.3 | 31.7 | 33.4 | 26.1  | 30.5 | 33   | 1 | 0.2 | 503  |
| 8 June  | 5 | 8.42 | 48.3 | 31.7 | 33.4 | 26.1  | 30.5 | 33   | 1 | 0.2 | 503  |
| 15      |   |      |      |      |      |       |      |      |   |     |      |
| June 15 | 5 | 8.81 | 45.3 | 31.7 | 30.6 | 28.16 | 30.6 | 30.8 | 1 | 0.2 | 637  |
| June 15 | 5 | 8.81 | 45.3 | 31.7 | 30.6 | 28.16 | 30.6 | 30.8 | 1 | 0.2 | 637  |
| June 15 | 5 | 8.81 | 45.3 | 31.7 | 30.6 | 28.16 | 30.6 | 30.8 | 1 | 0.2 | 637  |
| June 15 | 5 | 8.81 | 45.3 | 31.7 | 30.6 | 28.16 | 30.6 | 30.8 | 1 | 0.2 | 637  |
| June 22 | 5 | 8.81 | 45.3 | 31.7 | 30.6 | 28.16 | 30.6 | 30.8 | 1 | 0.2 | 637  |
| June 22 | 5 | 9.1  | 46.4 | 30.1 | 29.6 | 24.61 | 26.5 | 28.9 | 1 | 0   | 1573 |
| June 22 | 5 | 9.1  | 46.4 | 30.1 | 29.6 | 24.61 | 26.5 | 28.9 | 1 | 0   | 1573 |
| June    | 5 | 9.1  | 46.4 | 30.1 | 29.6 | 24.61 | 26.5 | 28.9 | 1 | 0   | 1573 |

[illegible]

|        |   |      |      |      |      |       |      |      |   |     |      |
|--------|---|------|------|------|------|-------|------|------|---|-----|------|
| 29     |   |      |      |      |      |       |      |      |   |     |      |
| June   | 6 | 8.44 | 66.7 | 28.6 | 27.6 | 25.79 | 28.4 | 29.6 | 1 | 0   | 964  |
| 29     |   |      |      |      |      |       |      |      |   |     |      |
| June   | 6 | 8.44 | 66.7 | 28.6 | 27.6 | 25.79 | 28.4 | 29.6 | 1 | 0   | 964  |
| 1 June | 7 | 7.93 | 72   | 27.3 | 29.9 | 25.27 | 27.7 | 25.9 | 3 | 0.2 | 971  |
| 1 June | 7 | 7.93 | 72   | 27.3 | 29.9 | 25.27 | 27.7 | 25.9 | 3 | 0.2 | 971  |
| 1 June | 7 | 7.93 | 72   | 27.3 | 29.9 | 25.27 | 27.7 | 25.9 | 3 | 0.2 | 971  |
| 1 June | 7 | 7.93 | 72   | 27.3 | 29.9 | 25.27 | 27.7 | 25.9 | 3 | 0.2 | 971  |
| 1 June | 7 | 7.93 | 72   | 27.3 | 29.9 | 25.27 | 27.7 | 25.9 | 3 | 0.2 | 971  |
| 1 June | 7 | 7.93 | 72   | 27.3 | 29.9 | 25.27 | 27.7 | 25.9 | 3 | 0.2 | 971  |
| 8 June | 7 | 7.71 | 50.4 | 29.4 | 30.1 | 30.5  | 30.5 | 30.2 | 3 | 0.2 | 1025 |
| 8 June | 7 | 7.71 | 50.4 | 29.4 | 30.1 | 30.5  | 30.5 | 30.2 | 3 | 0.2 | 1025 |
| 8 June | 7 | 7.71 | 50.4 | 29.4 | 30.1 | 30.5  | 30.5 | 30.2 | 3 | 0.2 | 1025 |
| 8 June | 7 | 7.71 | 50.4 | 29.4 | 30.1 | 30.5  | 30.5 | 30.2 | 3 | 0.2 | 1025 |
| 8 June | 7 | 7.71 | 50.4 | 29.4 | 30.1 | 30.5  | 30.5 | 30.2 | 3 | 0.2 | 1025 |
| 15     |   |      |      |      |      |       |      |      |   |     |      |
| June   | 7 | 7.96 | 55.7 | 30.5 | 29.1 | 29.31 | 27.5 | 28.2 | 3 | 0.2 | 1745 |
| 15     |   |      |      |      |      |       |      |      |   |     |      |
| June   | 7 | 7.96 | 55.7 | 30.5 | 29.1 | 29.31 | 27.5 | 28.2 | 3 | 0.2 | 1745 |
| 15     |   |      |      |      |      |       |      |      |   |     |      |
| June   | 7 | 7.96 | 55.7 | 30.5 | 29.1 | 29.31 | 27.5 | 28.2 | 3 | 0.2 | 1745 |
| 15     |   |      |      |      |      |       |      |      |   |     |      |
| June   | 7 | 7.96 | 55.7 | 30.5 | 29.1 | 29.31 | 27.5 | 28.2 | 3 | 0.2 | 1745 |
| 15     |   |      |      |      |      |       |      |      |   |     |      |
| June   | 7 | 7.96 | 55.7 | 30.5 | 29.1 | 29.31 | 27.5 | 28.2 | 3 | 0.2 | 1745 |
| 22     |   |      |      |      |      |       |      |      |   |     |      |
| June   | 7 | 7.91 | 45.6 | 28.4 | 27.6 | 25.64 | 26.6 | 27.1 | 1 | 0   | 941  |
| 22     |   |      |      |      |      |       |      |      |   |     |      |
| June   | 7 | 7.91 | 45.6 | 28.4 | 27.6 | 25.64 | 26.6 | 27.1 | 1 | 0   | 941  |
| 22     |   |      |      |      |      |       |      |      |   |     |      |
| June   | 7 | 7.91 | 45.6 | 28.4 | 27.6 | 25.64 | 26.6 | 27.1 | 1 | 0   | 941  |
| 22     |   |      |      |      |      |       |      |      |   |     |      |
| June   | 7 | 7.91 | 45.6 | 28.4 | 27.6 | 25.64 | 26.6 | 27.1 | 1 | 0   | 941  |
| 29     |   |      |      |      |      |       |      |      |   |     |      |
| June   | 7 | 7.93 | 69.5 | 27.8 | 27.3 | 25.46 | 25.1 | 25.7 | 3 | 0   | 761  |
| 29     |   |      |      |      |      |       |      |      |   |     |      |
| June   | 7 | 7.93 | 69.5 | 27.8 | 27.3 | 25.46 | 25.1 | 25.7 | 3 | 0   | 761  |
| 29     |   |      |      |      |      |       |      |      |   |     |      |
| June   | 7 | 7.93 | 69.5 | 27.8 | 27.3 | 25.46 | 25.1 | 25.7 | 3 | 0   | 761  |
| 29     |   |      |      |      |      |       |      |      |   |     |      |
| June   | 7 | 7.93 | 69.5 | 27.8 | 27.3 | 25.46 | 25.1 | 25.7 | 3 | 0   | 761  |
| 29     |   |      |      |      |      |       |      |      |   |     |      |
| June   | 7 | 7.93 | 69.5 | 27.8 | 27.3 | 25.46 | 25.1 | 25.7 | 3 | 0   | 761  |
| 1 June | 8 | 8.05 | 72.5 | 26.2 | 27.5 | 26.7  | 25.5 | 27.6 | 3 | 0.2 | 694  |
| 1 June | 8 | 8.05 | 72.5 | 26.2 | 27.5 | 26.7  | 25.5 | 27.6 | 3 | 0.2 | 694  |
| 1 June | 8 | 8.05 | 72.5 | 26.2 | 27.5 | 26.7  | 25.5 | 27.6 | 3 | 0.2 | 694  |
| 1 June | 8 | 8.05 | 72.5 | 26.2 | 27.5 | 26.7  | 25.5 | 27.6 | 3 | 0.2 | 694  |
| 1 June | 8 | 8.05 | 72.5 | 26.2 | 27.5 | 26.7  | 25.5 | 27.6 | 3 | 0.2 | 694  |
| 8 June | 8 | 7.73 | 47.6 | 28.9 | 29.2 | 28.2  | 28.3 | 29   | 5 | 0.2 | 459  |

|         |   |      |      |      |      |       |      |      |   |     |      |
|---------|---|------|------|------|------|-------|------|------|---|-----|------|
| 8 June  | 8 | 7.73 | 47.6 | 28.9 | 29.2 | 28.2  | 28.3 | 29   | 5 | 0.2 | 459  |
| 8 June  | 8 | 7.73 | 47.6 | 28.9 | 29.2 | 28.2  | 28.3 | 29   | 5 | 0.2 | 459  |
| 8 June  | 8 | 7.73 | 47.6 | 28.9 | 29.2 | 28.2  | 28.3 | 29   | 5 | 0.2 | 459  |
| 8 June  | 8 | 7.73 | 47.6 | 28.9 | 29.2 | 28.2  | 28.3 | 29   | 5 | 0.2 | 459  |
| 15 June | 8 | 7.97 | 64.1 | 30   | 29.2 | 29.59 | 26.7 | 27.2 | 3 | 0.2 | 364  |
| 15 June | 8 | 7.97 | 64.1 | 30   | 29.2 | 29.59 | 26.7 | 27.2 | 3 | 0.2 | 364  |
| 15 June | 8 | 7.97 | 64.1 | 30   | 29.2 | 29.59 | 26.7 | 27.2 | 3 | 0.2 | 364  |
| 15 June | 8 | 7.97 | 64.1 | 30   | 29.2 | 29.59 | 26.7 | 27.2 | 3 | 0.2 | 364  |
| 22 June | 8 | 7.84 | 45.7 | 28.1 | 27.5 | 24.68 | 25.7 | 26.5 | 3 | 0   | 1589 |
| 22 June | 8 | 7.84 | 45.7 | 28.1 | 27.5 | 24.68 | 25.7 | 26.5 | 3 | 0   | 1589 |
| 22 June | 8 | 7.84 | 45.7 | 28.1 | 27.5 | 24.68 | 25.7 | 26.5 | 3 | 0   | 1589 |
| 22 June | 8 | 7.84 | 45.7 | 28.1 | 27.5 | 24.68 | 25.7 | 26.5 | 3 | 0   | 1589 |
| 29 June | 8 | 7.84 | 45.7 | 28.1 | 27.5 | 24.68 | 25.7 | 26.5 | 3 | 0   | 1589 |
| 29 June | 8 | 7.86 | 70.2 | 27.1 | 27.1 | 24.37 | 27.9 | 23.1 | 3 | 0   | 317  |
| 29 June | 8 | 7.86 | 70.2 | 27.1 | 27.1 | 24.37 | 27.9 | 23.1 | 3 | 0   | 317  |
| 29 June | 8 | 7.86 | 70.2 | 27.1 | 27.1 | 24.37 | 27.9 | 23.1 | 3 | 0   | 317  |
| 29 June | 8 | 7.86 | 70.2 | 27.1 | 27.1 | 24.37 | 27.9 | 23.1 | 3 | 0   | 317  |
| 29 June | 8 | 7.86 | 70.2 | 27.1 | 27.1 | 24.37 | 27.9 | 23.1 | 3 | 0   | 317  |
| 1 June  | 9 | 8.12 | 72.6 | 29.1 | 31.6 | 26.7  | 26   | 29   | 3 | 0.3 | 571  |
| 1 June  | 9 | 8.12 | 72.6 | 29.1 | 31.6 | 26.7  | 26   | 29   | 3 | 0.3 | 571  |
| 1 June  | 9 | 8.12 | 72.6 | 29.1 | 31.6 | 26.7  | 26   | 29   | 3 | 0.3 | 571  |
| 1 June  | 9 | 8.12 | 72.6 | 29.1 | 31.6 | 26.7  | 26   | 29   | 3 | 0.3 | 571  |
| 1 June  | 9 | 8.12 | 72.6 | 29.1 | 31.6 | 26.7  | 26   | 29   | 3 | 0.3 | 571  |
| 8 June  | 9 | 7.88 | 42.3 | 31.8 | 32.6 | 31.8  | 31.3 | 32.4 | 5 | 0.3 | 1007 |
| 8 June  | 9 | 7.88 | 42.3 | 31.8 | 32.6 | 31.8  | 31.3 | 32.4 | 5 | 0.3 | 1007 |
| 8 June  | 9 | 7.88 | 42.3 | 31.8 | 32.6 | 31.8  | 31.3 | 32.4 | 5 | 0.3 | 1007 |
| 8 June  | 9 | 7.88 | 42.3 | 31.8 | 32.6 | 31.8  | 31.3 | 32.4 | 5 | 0.3 | 1007 |
| 15 June | 9 | 7.82 | 69.2 | 23.8 | 28.4 | 28.46 | 29.1 | 28.4 | 3 | 0.2 | 547  |
| 15 June | 9 | 7.82 | 69.2 | 23.8 | 28.4 | 28.46 | 29.1 | 28.4 | 3 | 0.2 | 547  |
| 15 June | 9 | 7.82 | 69.2 | 23.8 | 28.4 | 28.46 | 29.1 | 28.4 | 3 | 0.2 | 547  |

|         |    |      |      |      |      |       |      |      |   |     |      |
|---------|----|------|------|------|------|-------|------|------|---|-----|------|
| 15      |    |      |      |      |      |       |      |      |   |     |      |
| June 15 | 9  | 7.82 | 69.2 | 23.8 | 28.4 | 28.46 | 29.1 | 28.4 | 3 | 0.2 | 547  |
| June 22 | 9  | 7.82 | 69.2 | 23.8 | 28.4 | 28.46 | 29.1 | 28.4 | 3 | 0.2 | 547  |
| June 22 | 9  | 7.8  | 48.2 | 27.3 | 26.7 | 24.66 | 25.5 | 26.4 | 3 | 0.2 | 1678 |
| June 22 | 9  | 7.8  | 48.2 | 27.3 | 26.7 | 24.66 | 25.5 | 26.4 | 3 | 0.2 | 1678 |
| June 22 | 9  | 7.8  | 48.2 | 27.3 | 26.7 | 24.66 | 25.5 | 26.4 | 3 | 0.2 | 1678 |
| June 22 | 9  | 7.8  | 48.2 | 27.3 | 26.7 | 24.66 | 25.5 | 26.4 | 3 | 0.2 | 1678 |
| June 22 | 9  | 7.8  | 48.2 | 27.3 | 26.7 | 24.66 | 25.5 | 26.4 | 3 | 0.2 | 1678 |
| June 29 | 9  | 7.81 | 65.9 | 26.6 | 25.9 | 24.33 | 25.6 | 22.7 | 3 | 0.2 | 264  |
| June 29 | 9  | 7.81 | 65.9 | 26.6 | 25.9 | 24.33 | 25.6 | 22.7 | 3 | 0.2 | 264  |
| June 29 | 9  | 7.81 | 65.9 | 26.6 | 25.9 | 24.33 | 25.6 | 22.7 | 3 | 0.2 | 264  |
| June 29 | 9  | 7.81 | 65.9 | 26.6 | 25.9 | 24.33 | 25.6 | 22.7 | 3 | 0.2 | 264  |
| June 29 | 9  | 7.81 | 65.9 | 26.6 | 25.9 | 24.33 | 25.6 | 22.7 | 3 | 0.2 | 264  |
| 1 June  | 10 | 8.06 | 79.5 | 27.2 | 30.1 | 26.9  | 27.6 | 28.1 | 3 | 0.2 | 971  |
| 1 June  | 10 | 8.06 | 79.5 | 27.2 | 30.1 | 26.9  | 27.6 | 28.1 | 3 | 0.2 | 971  |
| 1 June  | 10 | 8.06 | 79.5 | 27.2 | 30.1 | 26.9  | 27.6 | 28.1 | 3 | 0.2 | 971  |
| 1 June  | 10 | 8.06 | 79.5 | 27.2 | 30.1 | 26.9  | 27.6 | 28.1 | 3 | 0.2 | 971  |
| 1 June  | 10 | 8.06 | 79.5 | 27.2 | 30.1 | 26.9  | 27.6 | 28.1 | 3 | 0.2 | 971  |
| 8 June  | 10 | 7.91 | 41.6 | 26.5 | 29.1 | 27.6  | 28.7 | 29.1 | 3 | 0.2 | 962  |
| 8 June  | 10 | 7.91 | 41.6 | 26.5 | 29.1 | 27.6  | 28.7 | 29.1 | 3 | 0.2 | 962  |
| 8 June  | 10 | 7.91 | 41.6 | 26.5 | 29.1 | 27.6  | 28.7 | 29.1 | 3 | 0.2 | 962  |
| 8 June  | 10 | 7.91 | 41.6 | 26.5 | 29.1 | 27.6  | 28.7 | 29.1 | 3 | 0.2 | 962  |
| 8 June  | 10 | 7.91 | 41.6 | 26.5 | 29.1 | 27.6  | 28.7 | 29.1 | 3 | 0.2 | 962  |
| 15      |    |      |      |      |      |       |      |      |   |     |      |
| June 15 | 10 | 7.9  | 69.1 | 22.4 | 26.6 | 28.73 | 28.5 | 26.3 | 3 | 0.2 | 594  |
| June 15 | 10 | 7.9  | 69.1 | 22.4 | 26.6 | 28.73 | 28.5 | 26.3 | 3 | 0.2 | 594  |
| June 15 | 10 | 7.9  | 69.1 | 22.4 | 26.6 | 28.73 | 28.5 | 26.3 | 3 | 0.2 | 594  |
| June 15 | 10 | 7.9  | 69.1 | 22.4 | 26.6 | 28.73 | 28.5 | 26.3 | 3 | 0.2 | 594  |
| June 22 | 10 | 7.9  | 69.1 | 22.4 | 26.6 | 28.73 | 28.5 | 26.3 | 3 | 0.2 | 594  |
| June 22 | 10 | 7.72 | 50.4 | 26.8 | 25.6 | 23.45 | 24.1 | 25.3 | 3 | 0.2 | 971  |
| June 22 | 10 | 7.72 | 50.4 | 26.8 | 25.6 | 23.45 | 24.1 | 25.3 | 3 | 0.2 | 971  |
| June    | 10 | 7.72 | 50.4 | 26.8 | 25.6 | 23.45 | 24.1 | 25.3 | 3 | 0.2 | 971  |

|         |    |      |      |      |      |       |      |      |   |     |      |
|---------|----|------|------|------|------|-------|------|------|---|-----|------|
| 22      |    |      |      |      |      |       |      |      |   |     |      |
| June 22 | 10 | 7.72 | 50.4 | 26.8 | 25.6 | 23.45 | 24.1 | 25.3 | 3 | 0.2 | 971  |
| June 29 | 10 | 7.72 | 50.4 | 26.8 | 25.6 | 23.45 | 24.1 | 25.3 | 3 | 0.2 | 971  |
| June 29 | 10 | 7.77 | 62.2 | 25.8 | 24.6 | 24.37 | 21.1 | 21.7 | 5 | 0.2 | 170  |
| June 29 | 10 | 7.77 | 62.2 | 25.8 | 24.6 | 24.37 | 21.1 | 21.7 | 5 | 0.2 | 170  |
| June 29 | 10 | 7.77 | 62.2 | 25.8 | 24.6 | 24.37 | 21.1 | 21.7 | 5 | 0.2 | 170  |
| June 29 | 10 | 7.77 | 62.2 | 25.8 | 24.6 | 24.37 | 21.1 | 21.7 | 5 | 0.2 | 170  |
| June 29 | 10 | 7.77 | 62.2 | 25.8 | 24.6 | 24.37 | 21.1 | 21.7 | 5 | 0.2 | 170  |
| 6 July  | 4  | 8.84 | 44.8 | 30.2 | 27.9 | 23.47 | 24.4 | 26.8 | 3 | 0.2 | 872  |
| 6 July  | 4  | 8.84 | 44.8 | 30.2 | 27.9 | 23.47 | 24.4 | 26.8 | 3 | 0.2 | 872  |
| 6 July  | 4  | 8.84 | 44.8 | 30.2 | 27.9 | 23.47 | 24.4 | 26.8 | 3 | 0.2 | 872  |
| 6 July  | 4  | 8.84 | 44.8 | 30.2 | 27.9 | 23.47 | 24.4 | 26.8 | 3 | 0.2 | 872  |
| 6 July  | 4  | 8.84 | 44.8 | 30.2 | 27.9 | 23.47 | 24.4 | 26.8 | 3 | 0.2 | 872  |
| 13 July | 4  | 8.42 | 47.8 | 29.5 | 31.3 | 29.1  | 27.4 | 27.3 | 3 | 0.2 | 879  |
| 13 July | 4  | 8.42 | 47.8 | 29.5 | 31.3 | 29.1  | 27.4 | 27.3 | 3 | 0.2 | 879  |
| 13 July | 4  | 8.42 | 47.8 | 29.5 | 31.3 | 29.1  | 27.4 | 27.3 | 3 | 0.2 | 879  |
| 13 July | 4  | 8.42 | 47.8 | 29.5 | 31.3 | 29.1  | 27.4 | 27.3 | 3 | 0.2 | 879  |
| 13 July | 4  | 8.42 | 47.8 | 29.5 | 31.3 | 29.1  | 27.4 | 27.3 | 3 | 0.2 | 879  |
| 20 July | 4  | 8.75 | 47.1 | 33.2 | 32.4 | 34.8  | 29.6 | 29.4 | 3 | 0.2 | 1364 |
| 20 July | 4  | 8.75 | 47.1 | 33.2 | 32.4 | 34.8  | 29.6 | 29.4 | 3 | 0.2 | 1364 |
| 20 July | 4  | 8.75 | 47.1 | 33.2 | 32.4 | 34.8  | 29.6 | 29.4 | 3 | 0.2 | 1364 |
| 20 July | 4  | 8.75 | 47.1 | 33.2 | 32.4 | 34.8  | 29.6 | 29.4 | 3 | 0.2 | 1364 |
| 20 July | 4  | 8.75 | 47.1 | 33.2 | 32.4 | 34.8  | 29.6 | 29.4 | 3 | 0.2 | 1364 |
| 27 July | 4  | 8.75 | 61.8 | 30.1 | 30.8 | 22.9  | 25.4 | 27.8 | 3 | 0.2 | 975  |
| 27 July | 4  | 8.75 | 61.8 | 30.1 | 30.8 | 22.9  | 25.4 | 27.8 | 3 | 0.2 | 975  |
| 27 July | 4  | 8.75 | 61.8 | 30.1 | 30.8 | 22.9  | 25.4 | 27.8 | 3 | 0.2 | 975  |
| 27 July | 4  | 8.75 | 61.8 | 30.1 | 30.8 | 22.9  | 25.4 | 27.8 | 3 | 0.2 | 975  |
| 27 July | 4  | 8.75 | 61.8 | 30.1 | 30.8 | 22.9  | 25.4 | 27.8 | 3 | 0.2 | 975  |
| 6 July  | 5  | 8.83 | 22.3 | 30.3 | 28   | 23.9  | 26.5 | 28.3 | 1 | 0   | 680  |
| 6 July  | 5  | 8.83 | 22.3 | 30.3 | 28   | 23.9  | 26.5 | 28.3 | 1 | 0   | 680  |
| 6 July  | 5  | 8.83 | 22.3 | 30.3 | 28   | 23.9  | 26.5 | 28.3 | 1 | 0   | 680  |
| 6 July  | 5  | 8.83 | 22.3 | 30.3 | 28   | 23.9  | 26.5 | 28.3 | 1 | 0   | 680  |
| 6 July  | 5  | 8.83 | 22.3 | 30.3 | 28   | 23.9  | 26.5 | 28.3 | 1 | 0   | 680  |
| 13 July | 5  | 8.44 | 42   | 29.2 | 30   | 29.3  | 28.9 | 29.1 | 1 | 0   | 957  |
| 13 July | 5  | 8.44 | 42   | 29.2 | 30   | 29.3  | 28.9 | 29.1 | 1 | 0   | 957  |
| 13 July | 5  | 8.44 | 42   | 29.2 | 30   | 29.3  | 28.9 | 29.1 | 1 | 0   | 957  |
| 13 July | 5  | 8.44 | 42   | 29.2 | 30   | 29.3  | 28.9 | 29.1 | 1 | 0   | 957  |
| 13 July | 5  | 8.44 | 42   | 29.2 | 30   | 29.3  | 28.9 | 29.1 | 1 | 0   | 957  |
| 20 July | 5  | 8.72 | 39.7 | 33.6 | 31.6 | 34.8  | 30.3 | 28.1 | 1 | 0   | 941  |
| 20 July | 5  | 8.72 | 39.7 | 33.6 | 31.6 | 34.8  | 30.3 | 28.1 | 1 | 0   | 941  |
| 20 July | 5  | 8.72 | 39.7 | 33.6 | 31.6 | 34.8  | 30.3 | 28.1 | 1 | 0   | 941  |
| 20 July | 5  | 8.72 | 39.7 | 33.6 | 31.6 | 34.8  | 30.3 | 28.1 | 1 | 0   | 941  |
| 20 July | 5  | 8.72 | 39.7 | 33.6 | 31.6 | 34.8  | 30.3 | 28.1 | 1 | 0   | 941  |

|         |   |      |      |      |      |       |      |      |   |     |     |
|---------|---|------|------|------|------|-------|------|------|---|-----|-----|
| 27 July | 5 | 8.62 | 49.1 | 29.9 | 30.1 | 22.5  | 26.2 | 25.3 | 1 | 0   | 897 |
| 27 July | 5 | 8.62 | 49.1 | 29.9 | 30.1 | 22.5  | 26.2 | 25.3 | 1 | 0   | 897 |
| 27 July | 5 | 8.62 | 49.1 | 29.9 | 30.1 | 22.5  | 26.2 | 25.3 | 1 | 0   | 897 |
| 27 July | 5 | 8.62 | 49.1 | 29.9 | 30.1 | 22.5  | 26.2 | 25.3 | 1 | 0   | 897 |
| 27 July | 5 | 8.62 | 49.1 | 29.9 | 30.1 | 22.5  | 26.2 | 25.3 | 1 | 0   | 897 |
| 6 July  | 6 | 8.34 | 42.9 | 28.4 | 27.2 | 24.2  | 27.9 | 28.4 | 3 | 0   | 702 |
| 6 July  | 6 | 8.34 | 42.9 | 28.4 | 27.2 | 24.2  | 27.9 | 28.4 | 3 | 0   | 702 |
| 6 July  | 6 | 8.34 | 42.9 | 28.4 | 27.2 | 24.2  | 27.9 | 28.4 | 3 | 0   | 702 |
| 6 July  | 6 | 8.34 | 42.9 | 28.4 | 27.2 | 24.2  | 27.9 | 28.4 | 3 | 0   | 702 |
| 6 July  | 6 | 8.34 | 42.9 | 28.4 | 27.2 | 24.2  | 27.9 | 28.4 | 3 | 0   | 702 |
| 13 July | 6 | 8.26 | 42.9 | 27.6 | 29.8 | 29.4  | 28.6 | 27.9 | 3 | 0   | 861 |
| 13 July | 6 | 8.26 | 42.9 | 27.6 | 29.8 | 29.4  | 28.6 | 27.9 | 3 | 0   | 861 |
| 13 July | 6 | 8.26 | 42.9 | 27.6 | 29.8 | 29.4  | 28.6 | 27.9 | 3 | 0   | 861 |
| 13 July | 6 | 8.26 | 42.9 | 27.6 | 29.8 | 29.4  | 28.6 | 27.9 | 3 | 0   | 861 |
| 13 July | 6 | 8.26 | 42.9 | 27.6 | 29.8 | 29.4  | 28.6 | 27.9 | 3 | 0   | 861 |
| 20 July | 6 | 8.32 | 40.3 | 33.4 | 31.5 | 34.9  | 30.1 | 28.3 | 3 | 0   | 874 |
| 20 July | 6 | 8.32 | 40.3 | 33.4 | 31.5 | 34.9  | 30.1 | 28.3 | 3 | 0   | 874 |
| 20 July | 6 | 8.32 | 40.3 | 33.4 | 31.5 | 34.9  | 30.1 | 28.3 | 3 | 0   | 874 |
| 20 July | 6 | 8.32 | 40.3 | 33.4 | 31.5 | 34.9  | 30.1 | 28.3 | 3 | 0   | 874 |
| 20 July | 6 | 8.32 | 40.3 | 33.4 | 31.5 | 34.9  | 30.1 | 28.3 | 3 | 0   | 874 |
| 27 July | 6 | 8.44 | 67.2 | 28.2 | 30.5 | 23.2  | 27.2 | 29.2 | 3 | 0   | 753 |
| 27 July | 6 | 8.44 | 67.2 | 28.2 | 30.5 | 23.2  | 27.2 | 29.2 | 3 | 0   | 753 |
| 27 July | 6 | 8.44 | 67.2 | 28.2 | 30.5 | 23.2  | 27.2 | 29.2 | 3 | 0   | 753 |
| 27 July | 6 | 8.44 | 67.2 | 28.2 | 30.5 | 23.2  | 27.2 | 29.2 | 3 | 0   | 753 |
| 27 July | 6 | 8.44 | 67.2 | 28.2 | 30.5 | 23.2  | 27.2 | 29.2 | 3 | 0   | 753 |
| 6 July  | 7 | 7.56 | 51.8 | 28.2 | 26.8 | 24.83 | 25.3 | 26.9 | 3 | 0   | 913 |
| 6 July  | 7 | 7.56 | 51.8 | 28.2 | 26.8 | 24.83 | 25.3 | 26.9 | 3 | 0   | 913 |
| 6 July  | 7 | 7.56 | 51.8 | 28.2 | 26.8 | 24.83 | 25.3 | 26.9 | 3 | 0   | 913 |
| 6 July  | 7 | 7.56 | 51.8 | 28.2 | 26.8 | 24.83 | 25.3 | 26.9 | 3 | 0   | 913 |
| 6 July  | 7 | 7.56 | 51.8 | 28.2 | 26.8 | 24.83 | 25.3 | 26.9 | 3 | 0   | 913 |
| 13 July | 7 | 7.83 | 53.4 | 27.9 | 29.7 | 29.2  | 26.2 | 26.5 | 3 | 0   | 897 |
| 13 July | 7 | 7.83 | 53.4 | 27.9 | 29.7 | 29.2  | 26.2 | 26.5 | 3 | 0   | 897 |
| 13 July | 7 | 7.83 | 53.4 | 27.9 | 29.7 | 29.2  | 26.2 | 26.5 | 3 | 0   | 897 |
| 13 July | 7 | 7.83 | 53.4 | 27.9 | 29.7 | 29.2  | 26.2 | 26.5 | 3 | 0   | 897 |
| 13 July | 7 | 7.83 | 53.4 | 27.9 | 29.7 | 29.2  | 26.2 | 26.5 | 3 | 0   | 897 |
| 20 July | 7 | 7.91 | 44.7 | 28.3 | 31.4 | 34.8  | 21.6 | 28.7 | 3 | 0   | 764 |
| 20 July | 7 | 7.91 | 44.7 | 28.3 | 31.4 | 34.8  | 21.6 | 28.7 | 3 | 0   | 764 |
| 20 July | 7 | 7.91 | 44.7 | 28.3 | 31.4 | 34.8  | 21.6 | 28.7 | 3 | 0   | 764 |
| 20 July | 7 | 7.91 | 44.7 | 28.3 | 31.4 | 34.8  | 21.6 | 28.7 | 3 | 0   | 764 |
| 20 July | 7 | 7.91 | 44.7 | 28.3 | 31.4 | 34.8  | 21.6 | 28.7 | 3 | 0   | 764 |
| 27 July | 7 | 7.93 | 61.4 | 28.3 | 30.2 | 23.3  | 25.7 | 27.3 | 3 | 0   | 918 |
| 27 July | 7 | 7.93 | 61.4 | 28.3 | 30.2 | 23.3  | 25.7 | 27.3 | 3 | 0   | 918 |
| 27 July | 7 | 7.93 | 61.4 | 28.3 | 30.2 | 23.3  | 25.7 | 27.3 | 3 | 0   | 918 |
| 27 July | 7 | 7.93 | 61.4 | 28.3 | 30.2 | 23.3  | 25.7 | 27.3 | 3 | 0   | 918 |
| 27 July | 7 | 7.93 | 61.4 | 28.3 | 30.2 | 23.3  | 25.7 | 27.3 | 3 | 0   | 918 |
| 6 July  | 8 | 7.32 | 57.4 | 27.9 | 26.9 | 24.21 | 27.2 | 24.2 | 3 | 0.2 | 531 |
| 6 July  | 8 | 7.32 | 57.4 | 27.9 | 26.9 | 24.21 | 27.2 | 24.2 | 3 | 0.2 | 531 |
| 6 July  | 8 | 7.32 | 57.4 | 27.9 | 26.9 | 24.21 | 27.2 | 24.2 | 3 | 0.2 | 531 |

|         |    |      |      |      |      |       |      |      |   |     |      |
|---------|----|------|------|------|------|-------|------|------|---|-----|------|
| 6 July  | 8  | 7.32 | 57.4 | 27.9 | 26.9 | 24.21 | 27.2 | 24.2 | 3 | 0.2 | 531  |
| 6 July  | 8  | 7.32 | 57.4 | 27.9 | 26.9 | 24.21 | 27.2 | 24.2 | 3 | 0.2 | 531  |
| 13 July | 8  | 7.91 | 52.4 | 27.5 | 29.4 | 29.7  | 28.4 | 27.7 | 3 | 0.2 | 851  |
| 13 July | 8  | 7.91 | 52.4 | 27.5 | 29.4 | 29.7  | 28.4 | 27.7 | 3 | 0.2 | 851  |
| 13 July | 8  | 7.91 | 52.4 | 27.5 | 29.4 | 29.7  | 28.4 | 27.7 | 3 | 0.2 | 851  |
| 13 July | 8  | 7.91 | 52.4 | 27.5 | 29.4 | 29.7  | 28.4 | 27.7 | 3 | 0.2 | 851  |
| 13 July | 8  | 7.91 | 52.4 | 27.5 | 29.4 | 29.7  | 28.4 | 27.7 | 3 | 0.2 | 851  |
| 20 July | 8  | 7.84 | 38.1 | 28.2 | 31.5 | 34.9  | 21.5 | 27.9 | 3 | 0.2 | 875  |
| 20 July | 8  | 7.84 | 38.1 | 28.2 | 31.5 | 34.9  | 21.5 | 27.9 | 3 | 0.2 | 875  |
| 20 July | 8  | 7.84 | 38.1 | 28.2 | 31.5 | 34.9  | 21.5 | 27.9 | 3 | 0.2 | 875  |
| 20 July | 8  | 7.84 | 38.1 | 28.2 | 31.5 | 34.9  | 21.5 | 27.9 | 3 | 0.2 | 875  |
| 20 July | 8  | 7.84 | 38.1 | 28.2 | 31.5 | 34.9  | 21.5 | 27.9 | 3 | 0.2 | 875  |
| 27 July | 8  | 7.56 | 53.8 | 27.8 | 29.8 | 23.1  | 26.2 | 25.1 | 3 | 0.5 | 560  |
| 27 July | 8  | 7.56 | 53.8 | 27.8 | 29.8 | 23.1  | 26.2 | 25.1 | 3 | 0.5 | 560  |
| 27 July | 8  | 7.56 | 53.8 | 27.8 | 29.8 | 23.1  | 26.2 | 25.1 | 3 | 0.5 | 560  |
| 27 July | 8  | 7.56 | 53.8 | 27.8 | 29.8 | 23.1  | 26.2 | 25.1 | 3 | 0.5 | 560  |
| 27 July | 8  | 7.56 | 53.8 | 27.8 | 29.8 | 23.1  | 26.2 | 25.1 | 3 | 0.5 | 560  |
| 6 July  | 9  | 7.43 | 46.2 | 26.8 | 25.5 | 24.13 | 24.9 | 23.8 | 3 | 0.2 | 739  |
| 6 July  | 9  | 7.43 | 46.2 | 26.8 | 25.5 | 24.13 | 24.9 | 23.8 | 3 | 0.2 | 739  |
| 6 July  | 9  | 7.43 | 46.2 | 26.8 | 25.5 | 24.13 | 24.9 | 23.8 | 3 | 0.2 | 739  |
| 6 July  | 9  | 7.43 | 46.2 | 26.8 | 25.5 | 24.13 | 24.9 | 23.8 | 3 | 0.2 | 739  |
| 6 July  | 9  | 7.43 | 46.2 | 26.8 | 25.5 | 24.13 | 24.9 | 23.8 | 3 | 0.2 | 739  |
| 13 July | 9  | 7.52 | 56.2 | 26.3 | 26.1 | 29    | 23.7 | 26.2 | 3 | 0.2 | 942  |
| 13 July | 9  | 7.52 | 56.2 | 26.3 | 26.1 | 29    | 23.7 | 26.2 | 3 | 0.2 | 942  |
| 13 July | 9  | 7.52 | 56.2 | 26.3 | 26.1 | 29    | 23.7 | 26.2 | 3 | 0.2 | 942  |
| 13 July | 9  | 7.52 | 56.2 | 26.3 | 26.1 | 29    | 23.7 | 26.2 | 3 | 0.2 | 942  |
| 13 July | 9  | 7.52 | 56.2 | 26.3 | 26.1 | 29    | 23.7 | 26.2 | 3 | 0.2 | 942  |
| 20 July | 9  | 7.82 | 40.9 | 28.4 | 27.6 | 34.7  | 25.2 | 26.8 | 3 | 0.2 | 1589 |
| 20 July | 9  | 7.82 | 40.9 | 28.4 | 27.6 | 34.7  | 25.2 | 26.8 | 3 | 0.2 | 1589 |
| 20 July | 9  | 7.82 | 40.9 | 28.4 | 27.6 | 34.7  | 25.2 | 26.8 | 3 | 0.2 | 1589 |
| 20 July | 9  | 7.82 | 40.9 | 28.4 | 27.6 | 34.7  | 25.2 | 26.8 | 3 | 0.2 | 1589 |
| 20 July | 9  | 7.82 | 40.9 | 28.4 | 27.6 | 34.7  | 25.2 | 26.8 | 3 | 0.2 | 1589 |
| 27 July | 9  | 7.81 | 46.2 | 26.5 | 26.4 | 23.9  | 21.9 | 26.1 | 3 | 0.2 | 1530 |
| 27 July | 9  | 7.81 | 46.2 | 26.5 | 26.4 | 23.9  | 21.9 | 26.1 | 3 | 0.2 | 1530 |
| 27 July | 9  | 7.81 | 46.2 | 26.5 | 26.4 | 23.9  | 21.9 | 26.1 | 3 | 0.2 | 1530 |
| 27 July | 9  | 7.81 | 46.2 | 26.5 | 26.4 | 23.9  | 21.9 | 26.1 | 3 | 0.2 | 1530 |
| 27 July | 9  | 7.81 | 46.2 | 26.5 | 26.4 | 23.9  | 21.9 | 26.1 | 3 | 0.2 | 1530 |
| 6 July  | 10 | 7.47 | 55.9 | 26.3 | 24.3 | 24.15 | 22.7 | 22.6 | 3 | 0.2 | 824  |
| 6 July  | 10 | 7.47 | 55.9 | 26.3 | 24.3 | 24.15 | 22.7 | 22.6 | 3 | 0.2 | 824  |
| 6 July  | 10 | 7.47 | 55.9 | 26.3 | 24.3 | 24.15 | 22.7 | 22.6 | 3 | 0.2 | 824  |
| 6 July  | 10 | 7.47 | 55.9 | 26.3 | 24.3 | 24.15 | 22.7 | 22.6 | 3 | 0.2 | 824  |
| 6 July  | 10 | 7.47 | 55.9 | 26.3 | 24.3 | 24.15 | 22.7 | 22.6 | 3 | 0.2 | 824  |
| 13 July | 10 | 7.61 | 57.9 | 26.9 | 26.5 | 29.1  | 24.3 | 28.1 | 3 | 0.2 | 1059 |
| 13 July | 10 | 7.61 | 57.9 | 26.9 | 26.5 | 29.1  | 24.3 | 28.1 | 3 | 0.2 | 1059 |
| 13 July | 10 | 7.61 | 57.9 | 26.9 | 26.5 | 29.1  | 24.3 | 28.1 | 3 | 0.2 | 1059 |
| 13 July | 10 | 7.61 | 57.9 | 26.9 | 26.5 | 29.1  | 24.3 | 28.1 | 3 | 0.2 | 1059 |
| 13 July | 10 | 7.61 | 57.9 | 26.9 | 26.5 | 29.1  | 24.3 | 28.1 | 3 | 0.2 | 1059 |
| 20 July | 10 | 7.63 | 37.2 | 28.5 | 27.8 | 35.1  | 26.4 | 27.1 | 3 | 0.5 | 1056 |

|         |    |      |      |      |      |      |      |      |   |     |      |
|---------|----|------|------|------|------|------|------|------|---|-----|------|
| 20 July | 10 | 7.63 | 37.2 | 28.5 | 27.8 | 35.1 | 26.4 | 27.1 | 3 | 0.5 | 1056 |
| 20 July | 10 | 7.63 | 37.2 | 28.5 | 27.8 | 35.1 | 26.4 | 27.1 | 3 | 0.5 | 1056 |
| 20 July | 10 | 7.63 | 37.2 | 28.5 | 27.8 | 35.1 | 26.4 | 27.1 | 3 | 0.5 | 1056 |
| 20 July | 10 | 7.63 | 37.2 | 28.5 | 27.8 | 35.1 | 26.4 | 27.1 | 3 | 0.5 | 1056 |
| 27 July | 10 | 7.73 | 46.7 | 27.1 | 26.9 | 24.1 | 23.8 | 24.2 | 5 | 0.5 | 1450 |
| 27 July | 10 | 7.73 | 46.7 | 27.1 | 26.9 | 24.1 | 23.8 | 24.2 | 5 | 0.5 | 1450 |
| 27 July | 10 | 7.73 | 46.7 | 27.1 | 26.9 | 24.1 | 23.8 | 24.2 | 5 | 0.5 | 1450 |
| 27 July | 10 | 7.73 | 46.7 | 27.1 | 26.9 | 24.1 | 23.8 | 24.2 | 5 | 0.5 | 1450 |
| 27 July | 10 | 7.73 | 46.7 | 27.1 | 26.9 | 24.1 | 23.8 | 24.2 | 5 | 0.5 | 1450 |

Table S2. Morphological and ecophysiological characteristics of *P. stratiotes* measured at 10 permanent sampling plots along thermal stream Topla.

| Date     | Sampling plot | Plant | Width rosette (cm) | Length leaf (cm) | Fv/Fm (light adapted) | Fv/Fm (dark adapted) | Weight (g) | Dry weight (g) |
|----------|---------------|-------|--------------------|------------------|-----------------------|----------------------|------------|----------------|
| 16 March | 1             | 1     | 8.3                | 3.2              | 0.468                 | 0.653                | 5.133      | 0.454          |
| 16 March | 1             | 2     | 6.1                | 3                | 0.455                 | 0.732                | 3.309      | 0.283          |
| 16 March | 1             | 3     | 8.9                | 4                | 0.586                 | 0.789                | 4.812      | 0.382          |
| 16 March | 1             | 4     | 9.8                | 4.2              | 0.645                 | 0.744                | 8.404      | 0.689          |
| 16 March | 1             | 5     | 6.2                | 2.5              | 0.455                 | 0.692                | 2.995      | 0.290          |
| 23 March | 1             | 1     | 7.5                | 3.5              | 0.459                 | 0.607                |            |                |
| 23 March | 1             | 2     | 6                  | 3                | 0.362                 | 0.631                |            |                |
| 23 March | 1             | 3     | 9.2                | 5.5              | 0.281                 | 0.53                 |            |                |
| 23 March | 1             | 4     | 6.9                | 3                | 0.545                 | 0.781                |            |                |
| 23 March | 1             | 5     | 7.1                | 3.3              | 0.328                 | 0.615                |            |                |
| 30 March | 1             | 1     | 6                  | 2.5              | 0.543                 | 0.674                | 1.427      | 0.396          |
| 30 March | 1             | 2     | 9.1                | 3.8              | 0.602                 | 0.763                | 7.502      | 0.119          |
| 30 March | 1             | 3     | 7.9                | 4.1              | 0.547                 | 0.755                | 4.937      | 0.308          |
| 30 March | 1             | 4     | 7.4                | 3.5              | 0.563                 | 0.756                | 4.536      | 0.133          |
| 30 March | 1             | 5     | 7.5                | 3.2              | 0.489                 | 0.711                | 6.212      | 0.072          |
| 16 March | 2             | 6     | 15                 | 6.5              | 0.419                 | 0.705                | 14.652     | 0.993          |
| 16 March | 2             | 7     | 12.9               | 5.2              | 0.395                 | 0.592                | 16.279     | 1.219          |
| 16 March | 2             | 8     | 13                 | 5.8              | 0.494                 | 0.761                | 24.970     | 1.968          |
| 16 March | 2             | 9     | 7                  | 2.5              | 0.384                 | 0.707                | 7.320      | 0.635          |
| 16 March | 2             | 10    | 8                  | 3.5              | 0.407                 | 0.757                | 5.576      | 0.427          |
| 23 March | 2             | 6     | 7.2                | 3.7              | 0.656                 | 0.699                |            |                |
| 23 March | 2             | 7     | 7.8                | 3.8              | 0.698                 | 0.794                |            |                |
| 23 March | 2             | 8     | 6                  | 3.2              | 0.606                 | 0.782                |            |                |
| 23 March | 2             | 9     | 3.8                | 1.5              | 0.543                 | 0.682                |            |                |
| 23 March | 2             | 10    | 6.5                | 3                | 0.611                 | 0.703                |            |                |
| 30 March | 2             | 6     | 8.6                | 4.1              | 0.387                 | 0.676                | 11.143     | 0.122          |
| 30 March | 2             | 7     | 9.5                | 4.4              | 0.541                 | 0.76                 | 10.34      | 0.421          |
| 30 March | 2             | 8     | 7.5                | 3.4              | 0.565                 | 0.755                | 5.436      | 0.17           |
| 30 March | 2             | 9     | 8                  | 4.2              | 0.478                 | 0.752                | 5.854      | 0.13           |
| 30 March | 2             | 10    | 7.9                | 3.5              | 0.521                 | 0.718                | 8.033      | 0.401          |
| 16 March | 3             | 11    | 3.2                | 1.8              | 0.419                 | 0.646                | 0.998      | 0.091          |
| 16 March | 3             | 12    | 8.7                | 4                | 0.264                 | 0.157                | 5.310      | 0.520          |
| 16 March | 3             | 13    | 7.5                | 3.5              | 0.462                 | 0.627                | 3.725      | 0.350          |
| 16 March | 3             | 14    | 10.1               | 5.1              | 0.520                 | 0.671                | 9.635      | 0.888          |
| 16 March | 3             | 15    | 7                  | 3.2              | 0.432                 | 0.671                | 2.930      | 0.269          |
| 23 March | 3             | 11    | 7.6                | 4                | 0.341                 | 0.572                |            |                |
| 23 March | 3             | 12    | 11                 | 4.8              | 0.212                 | 0.378                |            |                |
| 23 March | 3             | 13    | 5.3                | 2.7              | 0.477                 | 0.756                |            |                |

|          |   |    |      |     |       |       |        |       |
|----------|---|----|------|-----|-------|-------|--------|-------|
| 23 March | 3 | 14 | 4.3  | 2.5 | 0.240 | 0.419 |        |       |
| 23 March | 3 | 15 | 6    | 3.2 | 0.386 | 0.661 |        |       |
| 30 March | 3 | 11 | 8.5  | 4.2 | 0.565 | 0.73  | 5.87   | 1.369 |
| 30 March | 3 | 12 | 8.4  | 3.9 | 0.547 | 0.639 | 7.724  | 0.534 |
| 30 March | 3 | 13 | 8    | 3.5 | 0.258 | 0.62  | 6.543  | 0.867 |
| 30 March | 3 | 14 | 7.8  | 3.5 | 0.489 | 0.724 | 9.441  | 0.719 |
| 30 March | 3 | 15 | 13.3 | 6.5 | 0.538 | 0.704 | 12.900 | 0.568 |
| 16 March | 4 | 16 | 7    | 4   | 0.516 | 0.538 | 4.076  | 0.394 |
| 16 March | 4 | 17 | 11.5 | 5.3 | 0.636 | 0.753 | 22.508 | 2.9   |
| 16 March | 4 | 18 | 8    | 4   | 0.428 | 0.596 | 5.078  | 0.472 |
| 16 March | 4 | 19 | 7    | 3.2 | 0.612 | 0.756 | 3.135  | 0.296 |
| 16 March | 4 | 20 | 5.2  | 2   | 0.208 | 0.701 | 2.104  | 0.251 |
| 23 March | 4 | 16 | 8    | 5   | 0.354 | 0.493 |        |       |
| 23 March | 4 | 17 | 6.2  | 3.1 | 0.459 | 0.667 |        |       |
| 23 March | 4 | 18 | 7    | 3.6 | 0.594 | 0.778 |        |       |
| 23 March | 4 | 19 | 7.5  | 4.5 | 0.428 | 0.676 |        |       |
| 23 March | 4 | 20 | 6.5  | 3.6 | 0.359 | 0.176 |        |       |
| 30 March | 4 | 16 | 8.3  | 4   | 0.472 | 0.719 | 9.15   | 0.416 |
| 30 March | 4 | 17 | 7    | 3   | 0.392 | 0.645 | 4.977  | 0.702 |
| 30 March | 4 | 18 | 7    | 3.1 | 0.485 | 0.641 | 6.388  | 0.436 |
| 30 March | 4 | 19 | 8.9  | 4.5 | 0.423 | 0.675 | 11.629 | 0.124 |
| 30 March | 4 | 20 | 7.5  | 3.4 | 0.349 | 0.579 | 6.344  | 0.467 |
| 16 March | 5 | 21 | 8    | 3   | 0.519 | 0.617 | 7.678  | 0.678 |
| 16 March | 5 | 22 | 7.5  | 3.2 | 0.563 | 0.725 | 7.160  | 0.727 |
| 16 March | 5 | 23 | 10   | 4.8 | 0.429 | 0.605 | 10.409 | 1.173 |
| 16 March | 5 | 24 | 9    | 4.5 | 0.270 | 0.297 | 12.417 | 1.334 |
| 16 March | 5 | 25 | 8.2  | 3.5 | 0.231 | 0.269 | 12.698 | 0.974 |
| 23 March | 5 | 21 | 8    | 2.9 | 0.449 | 0.652 |        |       |
| 23 March | 5 | 22 | 6    | 2.3 | 0.564 | 0.755 |        |       |
| 23 March | 5 | 23 | 6.8  | 3.2 | 0.562 | 0.677 |        |       |
| 23 March | 5 | 24 | 6.8  | 3.2 | 0.349 | 0.541 |        |       |
| 23 March | 5 | 25 | 8.2  | 4.2 | 0.661 | 0.776 |        |       |
| 30 March | 5 | 21 | 10.5 | 6.2 | 0.289 | 0.505 | 8.762  | 0.387 |
| 30 March | 5 | 22 | 6.1  | 3   | 0.471 | 0.642 | 2.233  | 0.301 |
| 30 March | 5 | 23 | 5.7  | 2.7 | 0.366 | 0.591 | 2.247  | 0.284 |
| 30 March | 5 | 24 | 5    | 2.7 | 0.432 | 0.732 | 1.36   | 0.352 |
| 30 March | 5 | 25 | 5.6  | 2.8 | 0.514 | 0.619 | 1.937  | 0.258 |
| 16 March | 6 | 26 | 5.8  | 2.5 | 0.627 | 0.728 | 1.760  | 0.142 |
| 16 March | 6 | 27 | 3    | 1.2 | 0.545 | 0.584 | 0.183  | 0.018 |
| 16 March | 6 | 28 | 10   | 4.2 | 0.461 | 0.637 | 3.442  | 0.209 |
| 16 March | 6 | 29 | 5.8  | 2.3 | 0.662 | 0.725 | 2.422  | 0.170 |
| 16 March | 6 | 30 | 6    | 2.8 | 0.689 | 0.749 | 1.797  | 0.117 |
| 23 March | 6 | 26 | 4    | 1.8 | 0.402 | 0.742 |        |       |
| 23 March | 6 | 27 | 5.3  | 2.5 | 0.574 | 0.832 |        |       |
| 23 March | 6 | 28 | 6.4  | 2.8 | 0.497 | 0.732 |        |       |

|          |   |    |      |     |       |       |       |       |
|----------|---|----|------|-----|-------|-------|-------|-------|
| 23 March | 6 | 29 | 8.4  | 3.2 | 0.472 | 0.69  |       |       |
| 23 March | 6 | 30 | 8.3  | 4.1 | 0.589 | 0.631 |       |       |
| 30 March | 6 | 26 | 6.9  | 3.5 | 0.591 | 0.79  | 2.132 | 0.14  |
| 30 March | 6 | 27 | 8.6  | 4.5 | 0.436 | 0.755 | 3.584 | 0.321 |
| 30 March | 6 | 28 | 4.6  | 2.5 | 0.297 | 0.703 | 1.571 | 0.188 |
| 30 March | 6 | 29 | 5.5  | 3.2 | 0.465 | 0.73  | 1.175 | 0.296 |
| 30 March | 6 | 30 | 6.2  | 3.5 | 0.671 | 0.773 | 1.39  | 0.107 |
| 16 March | 7 | 31 | 11.2 | 5.1 | 0.784 | 0.827 | 0.820 | 0.066 |
| 16 March | 7 | 32 | 5.5  | 2.3 | 0.79  | 0.825 | 2.193 | 0.155 |
| 16 March | 7 | 33 | 6    | 2.8 | 0.757 | 0.805 | 6.538 | 0.447 |
| 16 March | 7 | 34 | 4    | 2.5 | 0.687 | 0.832 | 0.788 | 0.078 |
| 16 March | 7 | 35 | 5    | 2.3 | 0.753 | 0.770 | 1.082 | 0.130 |
| 23 March | 7 | 31 | 2.6  | 1.7 | 0.442 | 0.587 |       |       |
| 23 March | 7 | 32 | 2.8  | 2.4 | 0.445 | 0.536 |       |       |
| 23 March | 7 | 33 | 4.3  | 2   | 0.214 | 0.636 |       |       |
| 23 March | 7 | 34 | 2.8  | 1.5 | 0.448 | 0.714 |       |       |
| 23 March | 7 | 35 | 10   | 3.4 | 0.513 | 0.711 |       |       |
| 30 March | 7 | 31 | 7.9  | 3.5 | 0.376 | 0.745 | 7.563 | 0.09  |
| 30 March | 7 | 32 | 8.3  | 4   | 0.421 | 0.798 | 5.64  | 0.108 |
| 30 March | 7 | 33 | 8.4  | 3.6 | 0.311 | 0.731 | 4.136 | 0.077 |
| 30 March | 7 | 34 | 8.7  | 4.2 | 0.467 | 0.743 | 7.428 | 0.033 |
| 30 March | 7 | 35 | 8.5  | 4.3 | 0.492 | 0.697 | 5.547 | 0.369 |
| 16 March | 8 | 36 | 5.2  | 2.5 | 0.679 | 0.710 | 0.891 | 0.081 |
| 16 March | 8 | 37 | 6.2  | 3   | 0.726 | 0.782 | 3.704 | 0.372 |
| 16 March | 8 | 38 | 4    | 2.2 | 0.724 | 0.793 | 0.492 | 0.045 |
| 16 March | 8 | 39 | 6    | 3.5 | 0.672 | 0.714 | 2.342 | 0.214 |
| 16 March | 8 | 40 | 3.7  | 2   | 0.710 | 0.767 | 0.401 | 0.035 |
| 23 March | 8 | 36 | 7.8  | 4   | 0.701 | 0.799 |       |       |
| 23 March | 8 | 37 | 6.4  | 3.2 | 0.379 | 0.819 |       |       |
| 23 March | 8 | 38 | 6.3  | 3   | 0.597 | 0.751 |       |       |
| 23 March | 8 | 39 | 4.5  | 1.8 | 0.766 | 0.816 |       |       |
| 23 March | 8 | 40 | 8.2  | 4   | 0.580 | 0.747 |       |       |
| 30 March | 8 | 36 | 13.1 | 6.5 | 0.531 | 0.645 | 8.765 | 0.387 |
| 30 March | 8 | 37 | 5.5  | 2.4 | 0.422 | 0.597 | 2.564 | 0.281 |
| 30 March | 8 | 38 | 5.6  | 2.3 | 0.357 | 0.812 | 1.332 | 0.111 |
| 30 March | 8 | 39 | 4.6  | 2.3 | 0.461 | 0.792 | 1.581 | 0.213 |
| 30 March | 8 | 40 | 5.7  | 3.4 | 0.612 | 0.731 | 0.748 | 0.576 |
| 6 April  | 1 | 1  | 6.3  | 3.1 | 0.364 | 0.687 |       |       |
| 6 April  | 1 | 2  | 7.5  | 3.9 | 0.541 | 0.765 |       |       |
| 6 April  | 1 | 3  | 8.3  | 4.5 | 0.432 | 0.932 |       |       |
| 6 April  | 1 | 4  | 6.8  | 3.2 | 0.489 | 0.854 |       |       |
| 6 April  | 1 | 5  | 9.1  | 4.6 | 0.514 | 0.742 |       |       |
| 13 April | 1 | 1  | 10   | 4.8 | 0.354 | 0.874 | 5.539 | 0.121 |
| 13 April | 1 | 2  | 5.5  | 2.6 | 0.541 | 0.932 | 1.709 | 0.636 |
| 13 April | 1 | 3  | 6.6  | 3.5 | 0.532 | 0.514 | 4.14  | 1.057 |

|          |   |    |      |     |       |       |        |       |
|----------|---|----|------|-----|-------|-------|--------|-------|
| 13 April | 1 | 4  | 5.6  | 2.8 | 0.487 | 0.682 | 1.587  | 0.364 |
| 13 April | 1 | 5  | 4    | 2   | 0.651 | 0.951 | 0.973  | 0.451 |
| 20 April | 1 | 1  | 6.3  | 3.9 | 0.498 | 0.579 |        |       |
| 20 April | 1 | 2  | 8.3  | 4.2 | 0.462 | 0.652 |        |       |
| 20 April | 1 | 3  | 8.2  | 4.6 | 0.321 | 0.725 |        |       |
| 20 April | 1 | 4  | 9.1  | 5.2 | 0.462 | 0.621 |        |       |
| 20 April | 1 | 5  | 10.6 | 5.9 | 0.418 | 0.788 |        |       |
| 27 April | 1 | 1  | 9.4  | 5.3 | 0.574 | 0.714 | 1.932  | 0.845 |
| 27 April | 1 | 2  | 9.2  | 5.3 | 0.532 | 0.732 | 2.958  | 0.956 |
| 27 April | 1 | 3  | 11.3 | 6.2 | 0.641 | 0.741 | 2      | 0.206 |
| 27 April | 1 | 4  | 15.3 | 7.3 | 0.657 | 0.736 | 5      | 0.284 |
| 27 April | 1 | 5  | 10.9 | 5.3 | 0.681 | 0.801 | 3      | 0.558 |
| 6 April  | 2 | 6  | 7.9  | 3.5 | 0.324 | 0.755 |        |       |
| 6 April  | 2 | 7  | 5.2  | 2.8 | 0.461 | 0.832 |        |       |
| 6 April  | 2 | 8  | 8.4  | 4.1 | 0.399 | 0.741 |        |       |
| 6 April  | 2 | 9  | 9.6  | 4.8 | 0.418 | 0.826 |        |       |
| 6 April  | 2 | 10 | 8.9  | 4.2 | 0.531 | 0.742 |        |       |
| 13 April | 2 | 6  | 6.2  | 3   | 0.423 | 0.752 | 1.499  | 0.832 |
| 13 April | 2 | 7  | 8.8  | 4.5 | 0.514 | 0.743 | 7.565  | 0.751 |
| 13 April | 2 | 8  | 7.6  | 3.6 | 0.354 | 0.763 | 2.837  | 0.405 |
| 13 April | 2 | 9  | 6    | 3.5 | 0.493 | 0.791 | 1.952  | 0.368 |
| 13 April | 2 | 10 | 8    | 3.8 | 0.432 | 0.684 | 4.64   | 0.58  |
| 20 April | 2 | 6  | 11.3 | 5.9 | 0.451 | 0.702 |        |       |
| 20 April | 2 | 7  | 9.2  | 4.6 | 0.398 | 0.621 |        |       |
| 20 April | 2 | 8  | 8.3  | 4.3 | 0.412 | 0.601 |        |       |
| 20 April | 2 | 9  | 7.3  | 3.9 | 0.47  | 0.531 |        |       |
| 20 April | 2 | 10 | 5    | 2.5 | 0.535 | 0.731 |        |       |
| 27 April | 2 | 6  | 14.3 | 9.2 | 0.314 | 0.531 | 2      | 0.793 |
| 27 April | 2 | 7  | 10.3 | 6.2 | 0.394 | 0.598 | 2      | 0.248 |
| 27 April | 2 | 8  | 9.5  | 5.3 | 0.412 | 0.415 | 13     | 0.244 |
| 27 April | 2 | 9  | 7.3  | 4.1 | 0.42  | 0.714 | 3      | 1.024 |
| 27 April | 2 | 10 | 8.3  | 5.2 | 0.455 | 0.681 | 4      | 0.461 |
| 6 April  | 3 | 11 | 8.6  | 4.9 | 0.413 | 0.875 |        |       |
| 6 April  | 3 | 12 | 9.4  | 5.1 | 0.365 | 0.652 |        |       |
| 6 April  | 3 | 13 | 9.4  | 4.6 | 0.543 | 0.714 |        |       |
| 6 April  | 3 | 14 | 13.8 | 7.2 | 0.387 | 0.896 |        |       |
| 6 April  | 3 | 15 | 11.2 | 6.3 | 0.472 | 0.547 |        |       |
| 13 April | 3 | 11 | 11.3 | 5.2 | 0.415 | 0.972 | 18.231 | 0.512 |
| 13 April | 3 | 12 | 10.5 | 5.2 | 0.431 | 0.783 | 10.105 | 0.652 |
| 13 April | 3 | 13 | 10.1 | 5.3 | 0.451 | 0.796 | 11.183 | 0.545 |
| 13 April | 3 | 14 | 8.5  | 4.2 | 0.351 | 0.802 | 8.427  | 0.805 |
| 13 April | 3 | 15 | 9.5  | 5   | 0.412 | 0.862 | 8 4    | 0.785 |
| 20 April | 3 | 11 | 9    | 5.1 | 0.476 | 0.711 |        |       |
| 20 April | 3 | 12 | 8.3  | 4.2 | 0.391 | 0.736 |        |       |
| 20 April | 3 | 13 | 7.3  | 4.1 | 0.486 | 0.702 |        |       |

|          |   |    |      |     |       |       |       |       |
|----------|---|----|------|-----|-------|-------|-------|-------|
| 20 April | 3 | 14 | 11.3 | 5.6 | 0.287 | 0.531 |       |       |
| 20 April | 3 | 15 | 15.2 | 7.6 | 0.302 | 0.544 |       |       |
| 27 April | 3 | 11 | 8.7  | 4.4 | 0.473 | 0.695 | 1     | 0.405 |
| 27 April | 3 | 12 | 10.4 | 5.5 | 0.327 | 0.625 | 4.59  | 1.3   |
| 27 April | 3 | 13 | 7.8  | 3.5 | 0.244 | 0.475 | 1     | 0.597 |
| 27 April | 3 | 14 | 6.4  | 3.2 | 0.291 | 0.519 | 2.81  | 1.206 |
| 27 April | 3 | 15 | 7.3  | 3.5 | 0.559 | 0.778 | 4     | 0.156 |
| 6 April  | 4 | 16 | 8.2  | 4   | 0.264 | 0.671 |       |       |
| 6 April  | 4 | 17 | 7.5  | 3.4 | 0.341 | 0.927 |       |       |
| 6 April  | 4 | 18 | 6.9  | 3.8 | 0.364 | 0.762 |       |       |
| 6 April  | 4 | 19 | 8.3  | 4.1 | 0.421 | 0.672 |       |       |
| 6 April  | 4 | 20 | 7.4  | 3.9 | 0.452 | 0.61  |       |       |
| 13 April | 4 | 16 | 6    | 3.2 | 0.364 | 0.751 | 4.507 | 0.793 |
| 13 April | 4 | 17 | 10.4 | 5   | 0.351 | 0.682 | 9.543 | 0.486 |
| 13 April | 4 | 18 | 7    | 3.6 | 0.345 | 0.761 | 5.89  | 0.665 |
| 13 April | 4 | 19 | 5    | 2.2 | 0.311 | 0.864 | 1.885 | 0.873 |
| 13 April | 4 | 20 | 7.9  | 3.1 | 0.462 | 0.791 | 5.938 | 0.412 |
| 20 April | 4 | 16 | 8.3  | 4.1 | 0.421 | 0.631 |       |       |
| 20 April | 4 | 17 | 12.3 | 6.3 | 0.298 | 0.499 |       |       |
| 20 April | 4 | 18 | 6.3  | 3.4 | 0.241 | 0.478 |       |       |
| 20 April | 4 | 19 | 8.9  | 4.5 | 0.384 | 0.541 |       |       |
| 20 April | 4 | 20 | 9.3  | 5.7 | 0.301 | 0.566 |       |       |
| 27 April | 4 | 16 | 9.8  | 5   | 0.363 | 0.802 | 3     | 0.767 |
| 27 April | 4 | 17 | 6.7  | 3   | 0.671 | 0.762 | 1     | 1.125 |
| 27 April | 4 | 18 | 7.5  | 3.5 | 0.302 | 0.501 | 2     | 0.888 |
| 27 April | 4 | 19 | 8.5  | 4   | 0.485 | 0.685 | 3     | 0.761 |
| 27 April | 4 | 20 | 6    | 2.4 | 0.339 | 0.515 | 3     | 0.546 |
| 6 April  | 5 | 21 | 6.8  | 3.4 | 0.412 | 0.783 |       |       |
| 6 April  | 5 | 22 | 7.9  | 4.3 | 0.51  | 0.724 |       |       |
| 6 April  | 5 | 23 | 8.2  | 4.1 | 0.541 | 0.821 |       |       |
| 6 April  | 5 | 24 | 6.1  | 3.9 | 0.364 | 0.521 |       |       |
| 6 April  | 5 | 25 | 9.8  | 5.1 | 0.511 | 0.631 |       |       |
| 13 April | 5 | 21 | 11.5 | 5.6 | 0.431 | 0.765 | 6.552 | 0.692 |
| 13 April | 5 | 22 | 7    | 3.5 | 0.364 | 0.754 | 4.236 | 0.201 |
| 13 April | 5 | 23 | 7.9  | 3.1 | 0.451 | 0.732 | 3.892 | 0.184 |
| 13 April | 5 | 24 | 8.6  | 4.2 | 0.431 | 0.812 | 5.342 | 0.113 |
| 13 April | 5 | 25 | 6.2  | 3.5 | 0.499 | 0.764 | 3.443 | 0.172 |
| 20 April | 5 | 21 | 12.3 | 7.2 | 0.565 | 0.714 |       |       |
| 20 April | 5 | 22 | 11.2 | 6.1 | 0.314 | 0.635 |       |       |
| 20 April | 5 | 23 | 10.3 | 5.9 | 0.355 | 0.522 |       |       |
| 20 April | 5 | 24 | 9.6  | 4.6 | 0.531 | 0.799 |       |       |
| 20 April | 5 | 25 | 7.3  | 3.8 | 0.287 | 0.614 |       |       |
| 27 April | 5 | 21 | 10.4 | 5   | 0.438 | 0.581 | 2     | 2.136 |
| 27 April | 5 | 22 | 13.3 | 3.8 | 0.428 | 0.623 | 10    | 1.568 |
| 27 April | 5 | 23 | 5.4  | 2.5 | 0.551 | 0.796 | 3     | 0.864 |

|          |   |    |      |     |       |       |       |       |
|----------|---|----|------|-----|-------|-------|-------|-------|
| 27 April | 5 | 24 | 6.8  | 3   | 0.276 | 0.542 | 4     | 1.313 |
| 27 April | 5 | 25 | 6.2  | 2.7 | 0.55  | 0.725 | 3     | 0.568 |
| 6 April  | 6 | 26 | 5.3  | 2.8 | 0.497 | 0.691 |       |       |
| 6 April  | 6 | 27 | 9.5  | 4.9 | 0.497 | 0.794 |       |       |
| 6 April  | 6 | 28 | 3.9  | 2.8 | 0.531 | 0.697 |       |       |
| 6 April  | 6 | 29 | 5.2  | 2.5 | 0.379 | 0.603 |       |       |
| 6 April  | 6 | 30 | 7.5  | 3.2 | 0.397 | 0.567 |       |       |
| 13 April | 6 | 26 | 6.5  | 4   | 0.431 | 0.769 | 2.256 | 0.164 |
| 13 April | 6 | 27 | 8.5  | 5.8 | 0.378 | 0.746 | 2.963 | 0.27  |
| 13 April | 6 | 28 | 7    | 3.6 | 0.412 | 0.71  | 2.704 | 0.044 |
| 13 April | 6 | 29 | 11.5 | 5.6 | 0.411 | 0.907 | 4.864 | 0.072 |
| 13 April | 6 | 30 | 6    | 2.8 | 0.431 | 0.564 | 1.744 | 0.098 |
| 20 April | 6 | 26 | 11.2 | 6.9 | 0.314 | 0.697 |       |       |
| 20 April | 6 | 27 | 10.6 | 5.7 | 0.274 | 0.51  |       |       |
| 20 April | 6 | 28 | 8.7  | 4.1 | 0.496 | 0.503 |       |       |
| 20 April | 6 | 29 | 10.3 | 5.3 | 0.305 | 0.709 |       |       |
| 20 April | 6 | 30 | 9.3  | 4.6 | 0.275 | 0.622 |       |       |
| 27 April | 6 | 26 | 10.6 | 4.8 | 0.628 | 0.822 | 3     | 0.137 |
| 27 April | 6 | 27 | 2.5  | 6   | 0.79  | 0.82  | 12    | 0.379 |
| 27 April | 6 | 28 | 8.4  | 4   | 0.59  | 0.825 | 3     | 0.484 |
| 27 April | 6 | 29 | 10.5 | 6   | 0.577 | 0.833 | 3     | 0.308 |
| 27 April | 6 | 30 | 8.7  | 3.8 | 0.686 | 0.782 | 2     | 0.266 |
| 6 April  | 7 | 31 | 9.1  | 5.2 | 0.366 | 0.561 |       |       |
| 6 April  | 7 | 32 | 11.3 | 5.3 | 0.431 | 0.497 |       |       |
| 6 April  | 7 | 33 | 10.2 | 5.6 | 0.501 | 0.532 |       |       |
| 6 April  | 7 | 34 | 7.9  | 3.9 | 0.309 | 0.901 |       |       |
| 6 April  | 7 | 35 | 9.2  | 4.6 | 0.614 | 0.632 |       |       |
| 13 April | 7 | 31 | 7    | 3.6 | 0.497 | 0.761 | 1.555 | 0.479 |
| 13 April | 7 | 32 | 6.7  | 3   | 0.364 | 0.831 | 1.629 | 0.468 |
| 13 April | 7 | 33 | 4.9  | 2   | 0.364 | 0.782 | 1.562 | 0.234 |
| 13 April | 7 | 34 | 4.3  | 2.7 | 0.299 | 0.755 | 0.817 | 0.379 |
| 13 April | 7 | 35 | 5.1  | 3.2 | 0.311 | 0.716 | 5.177 | 0.340 |
| 20 April | 7 | 31 | 10   | 5   | 0.391 | 0.671 |       |       |
| 20 April | 7 | 32 | 9.3  | 4.4 | 0.458 | 0.695 |       |       |
| 20 April | 7 | 33 | 11.3 | 6.2 | 0.391 | 0.789 |       |       |
| 20 April | 7 | 34 | 15.3 | 8.4 | 0.329 | 0.694 |       |       |
| 20 April | 7 | 35 | 12.4 | 6.4 | 0.512 | 0.741 |       |       |
| 27 April | 7 | 31 | 4.5  | 2.5 | 0.747 | 0.793 | 10    | 0.634 |
| 27 April | 7 | 32 | 12   | 5.5 | 0.576 | 0.807 | 4     | 0.315 |
| 27 April | 7 | 33 | 11.6 | 5.5 | 0.631 | 0.823 | 5     | 0.103 |
| 27 April | 7 | 34 | 6.6  | 2.8 | 0.532 | 0.809 | 2     | 0.084 |
| 27 April | 7 | 35 | 7.3  | 3.4 | 0.709 | 0.79  | 3     | 0.105 |
| 6 April  | 8 | 36 | 5.3  | 2.3 | 0.364 | 0.571 |       |       |
| 6 April  | 8 | 37 | 6.2  | 3.4 | 0.411 | 0.695 |       |       |
| 6 April  | 8 | 38 | 7.6  | 4.1 | 0.366 | 0.796 |       |       |

|          |   |    |      |     |       |       |        |       |
|----------|---|----|------|-----|-------|-------|--------|-------|
| 6 April  | 8 | 39 | 5.1  | 2.6 | 0.421 | 0.743 |        |       |
| 6 April  | 8 | 40 | 6.7  | 3.8 | 0.365 | 0.682 |        |       |
| 13 April | 8 | 36 | 11.8 | 6.1 | 0.366 | 0.799 | 6.543  | 0.589 |
| 13 April | 8 | 37 | 9.8  | 5.5 | 0.412 | 0.712 | 5.36   | 0.068 |
| 13 April | 8 | 38 | 8    | 9.6 | 0.501 | 0.801 | 2.323  | 0.061 |
| 13 April | 8 | 39 | 5    | 2.2 | 0.333 | 0.764 | 2.744  | 0.038 |
| 13 April | 8 | 40 | 15   | 7.6 | 0.215 | 0.902 | 11.878 | 0.048 |
| 20 April | 8 | 36 | 11.3 | 5.9 | 0.482 | 0.698 |        |       |
| 20 April | 8 | 37 | 12   | 7.1 | 0.488 | 0.755 |        |       |
| 20 April | 8 | 38 | 14.3 | 7.3 | 0.392 | 0.691 |        |       |
| 20 April | 8 | 39 | 11.2 | 6.1 | 0.325 | 0.741 |        |       |
| 20 April | 8 | 40 | 10.3 | 5.1 | 0.284 | 0.694 |        |       |
| 27 April | 8 | 36 | 9.2  | 5.2 | 0.412 | 0.741 | 3      | 0.564 |
| 27 April | 8 | 37 | 7.3  | 4.3 | 0.651 | 0.795 | 3      | 0.202 |
| 27 April | 8 | 38 | 11.2 | 6.2 | 0.431 | 0.714 | 5      | 0.184 |
| 27 April | 8 | 39 | 12.3 | 7.1 | 0.42  | 0.698 | 2      | 0.118 |
| 27 April | 8 | 40 | 14.3 | 7.9 | 0.302 | 0.799 | 4      | 0.04  |
| 4 May    | 1 | 1  | 4.1  | 2.1 | 0.364 | 0.541 |        |       |
| 4 May    | 1 | 2  | 5.2  | 2.5 | 0.412 | 0.684 |        |       |
| 4 May    | 1 | 3  | 3.1  | 1.6 | 0.384 | 0.741 |        |       |
| 4 May    | 1 | 4  | 2.8  | 1.4 | 0.412 | 0.791 |        |       |
| 4 May    | 1 | 5  | 3.4  | 1.6 | 0.641 | 0.801 |        |       |
| 11 May   | 1 | 1  | 5    | 2.2 | 0.357 | 0.698 | 1.873  | 0.213 |
| 11 May   | 1 | 2  | 4.8  | 2   | 0.403 | 0.602 | 3.818  | 0.38  |
| 11 May   | 1 | 3  | 3    | 2   | 0.364 | 0.736 | 1.439  | 0.081 |
| 11 May   | 1 | 4  | 3    | 1.5 | 0.512 | 0.719 | 0.221  | 0.015 |
| 11 May   | 1 | 5  | 3.8  | 1.6 | 0.543 | 0.719 | 0.254  | 0.014 |
| 4 May    | 2 | 6  | 3.8  | 1.9 | 0.341 | 0.791 |        |       |
| 4 May    | 2 | 7  | 4.1  | 2.5 | 0.461 | 0.714 |        |       |
| 4 May    | 2 | 8  | 4.8  | 2.4 | 0.371 | 0.641 |        |       |
| 4 May    | 2 | 9  | 3.9  | 1.9 | 0.364 | 0.714 |        |       |
| 4 May    | 2 | 10 | 5.9  | 2.7 | 0.467 | 0.699 |        |       |
| 11 May   | 2 | 6  | 4    | 3.7 | 0.578 | 0.791 | 0.847  | 0.091 |
| 11 May   | 2 | 7  | 4.3  | 1.9 | 0.674 | 0.81  | 1.57   | 0.111 |
| 11 May   | 2 | 8  | 5    | 2.8 | 0.715 | 0.799 | 3.221  | 0.108 |
| 11 May   | 2 | 9  | 4.1  | 1.7 | 0.761 | 0.867 | 0.533  | 0.049 |
| 11 May   | 2 | 10 | 6.8  | 2.9 | 0.644 | 0.709 | 6.416  | 0.478 |
| 4 May    | 3 | 11 | 6.2  | 3.1 | 0.394 | 0.514 |        |       |
| 4 May    | 3 | 12 | 6.7  | 3.2 | 0.366 | 0.641 |        |       |
| 4 May    | 3 | 13 | 5.2  | 2.5 | 0.415 | 0.789 |        |       |
| 4 May    | 3 | 14 | 5.3  | 2.6 | 0.497 | 0.641 |        |       |
| 4 May    | 3 | 15 | 3.7  | 1.9 | 0.541 | 0.792 |        |       |
| 11 May   | 3 | 11 | 6.5  | 2.7 | 0.744 | 0.867 | 4.338  | 0.383 |
| 11 May   | 3 | 12 | 7    | 2.9 | 0.629 | 0.791 | 3.515  | 0.289 |
| 11 May   | 3 | 13 | 4.5  | 2.1 | 0.637 | 0.739 | 1.808  | 0.152 |

|        |   |    |      |     |       |       |        |       |
|--------|---|----|------|-----|-------|-------|--------|-------|
| 11 May | 3 | 14 | 5.8  | 2.8 | 0.519 | 0.719 | 6.354  | 0.503 |
| 11 May | 3 | 15 | 4    | 2   | 0.597 | 0.871 | 1.115  | 0.108 |
| 18 May | 3 | 1  | 8.4  | 4.4 | 0.364 | 0.641 | 5.941  | 0.398 |
| 18 May | 3 | 2  | 6    | 2.9 | 0.366 | 0.699 | 1.232  | 0.117 |
| 18 May | 3 | 3  | 3.8  | 1.7 | 0.454 | 0.751 | 1.179  | 0.084 |
| 18 May | 3 | 4  | 3.9  | 1.6 | 0.301 | 0.694 | 1.311  | 0.188 |
| 18 May | 3 | 5  | 4.8  | 2   | 0.497 | 0.789 | 4.574  | 0.327 |
| 25 May | 3 | 1  | 3.2  | 1.7 | 0.452 | 0.791 |        |       |
| 25 May | 3 | 2  | 5.8  | 2.8 | 0.425 | 0.725 |        |       |
| 25 May | 3 | 3  | 4.5  | 2.3 | 0.369 | 0.643 |        |       |
| 25 May | 3 | 4  | 3.8  | 2.4 | 0.523 | 0.851 |        |       |
| 25 May | 3 | 5  | 4    | 1.8 | 0.498 | 0.762 |        |       |
| 4 May  | 4 | 16 | 15.3 | 6.5 | 0.439 | 0.715 |        |       |
| 4 May  | 4 | 17 | 11.8 | 5.3 | 0.374 | 0.761 |        |       |
| 4 May  | 4 | 18 | 11.9 | 5.1 | 0.361 | 0.775 |        |       |
| 4 May  | 4 | 19 | 7.2  | 3.9 | 0.412 | 0.691 |        |       |
| 4 May  | 4 | 20 | 6.4  | 3.3 | 0.491 | 0.799 |        |       |
| 11 May | 4 | 16 | 16.3 | 6.5 | 0.439 | 0.614 | 30.503 | 2.501 |
| 11 May | 4 | 17 | 12.3 | 5.5 | 0.794 | 0.842 | 22.191 | 1.964 |
| 11 May | 4 | 18 | 12.8 | 5.4 | 0.722 | 0.841 | 32.362 | 2.077 |
| 11 May | 4 | 19 | 7.5  | 3.4 | 0.794 | 0.891 | 5.37   | 0.526 |
| 11 May | 4 | 20 | 7    | 3.2 | 0.681 | 0.791 | 4.546  | 0.382 |
| 18 May | 4 | 6  | 10   | 4.8 | 0.401 | 0.711 | 10.329 | 0.627 |
| 18 May | 4 | 7  | 9.7  | 4.1 | 0.399 | 0.694 | 13.61  | 1.053 |
| 18 May | 4 | 8  | 10.7 | 5.2 | 0.471 | 0.741 | 23.056 | 1.425 |
| 18 May | 4 | 9  | 9    | 4.5 | 0.514 | 0.805 | 12.502 | 0.739 |
| 18 May | 4 | 10 | 6.7  | 3.5 | 0.391 | 0.677 | 8.289  | 0.476 |
| 25 May | 4 | 6  | 7.5  | 4.5 | 0.479 | 0.719 |        |       |
| 25 May | 4 | 7  | 9.3  | 5.4 | 0.487 | 0.492 |        |       |
| 25 May | 4 | 8  | 9.7  | 6   | 0.465 | 0.473 |        |       |
| 25 May | 4 | 9  | 10.5 | 5.2 | 0.562 | 0.827 |        |       |
| 25 May | 4 | 10 | 8.3  | 4.5 | 0.479 | 0.716 |        |       |
| 4 May  | 5 | 21 | 10.5 | 5.9 | 0.364 | 0.724 |        |       |
| 4 May  | 5 | 22 | 7.9  | 4.1 | 0.481 | 0.793 |        |       |
| 4 May  | 5 | 23 | 8.4  | 4.2 | 0.593 | 0.784 |        |       |
| 4 May  | 5 | 24 | 5.3  | 2.7 | 0.473 | 0.624 |        |       |
| 4 May  | 5 | 25 | 5.5  | 2.9 | 0.431 | 0.679 |        |       |
| 11 May | 5 | 21 | 11   | 5.4 | 0.694 | 0.724 | 17.664 | 1.346 |
| 11 May | 5 | 22 | 8    | 3.9 | 0.719 | 0.793 | 6.055  | 0.498 |
| 11 May | 5 | 23 | 9.2  | 4.6 | 0.593 | 0.784 | 13.404 | 1.095 |
| 11 May | 5 | 24 | 4.8  | 2.9 | 0.473 | 0.624 | 1.635  | 0.151 |
| 11 May | 5 | 25 | 6.5  | 3.7 | 0.431 | 0.679 | 3.744  | 0.283 |
| 18 May | 5 | 11 | 9.9  | 5.2 | 0.491 | 0.514 | 7.917  | 0.443 |
| 18 May | 5 | 12 | 9.2  | 4.3 | 0.441 | 0.691 | 8.055  | 0.498 |
| 18 May | 5 | 13 | 10.4 | 5.5 | 0.364 | 0.711 | 10.46  | 0.682 |

|        |   |    |      |     |       |       |        |       |
|--------|---|----|------|-----|-------|-------|--------|-------|
| 18 May | 5 | 14 | 8.8  | 4   | 0.491 | 0.791 | 9.974  | 0.698 |
| 18 May | 5 | 15 | 7.8  | 2.4 | 0.361 | 0.694 | 3.235  | 0.201 |
| 25 May | 5 | 11 | 13.6 | 6.8 | 0.487 | 0.862 |        |       |
| 25 May | 5 | 12 | 10.5 | 5.4 | 0.286 | 0.593 |        |       |
| 25 May | 5 | 13 | 8.7  | 4.5 | 0.459 | 0.749 |        |       |
| 25 May | 5 | 14 | 9.5  | 5.8 | 0.415 | 0.792 |        |       |
| 25 May | 5 | 15 | 10.3 | 6.5 | 0.496 | 0.849 |        |       |
| 4 May  | 6 | 26 | 9.6  | 5.3 | 0.371 | 0.791 |        |       |
| 4 May  | 6 | 27 | 13.6 | 6.1 | 0.394 | 0.769 |        |       |
| 4 May  | 6 | 28 | 7.1  | 4.1 | 0.461 | 0.641 |        |       |
| 4 May  | 6 | 29 | 11.6 | 5   | 0.397 | 0.697 |        |       |
| 4 May  | 6 | 30 | 11.5 | 5.6 | 0.444 | 0.761 |        |       |
| 11 May | 6 | 26 | 10.5 | 4.6 | 0.531 | 0.791 | 5.844  | 0.462 |
| 11 May | 6 | 27 | 14.8 | 6.2 | 0.591 | 0.769 | 15.19  | 1.074 |
| 11 May | 6 | 28 | 8.7  | 4.5 | 0.487 | 0.591 | 2.348  | 0.161 |
| 11 May | 6 | 29 | 12.5 | 6   | 0.419 | 0.533 | 7.112  | 0.521 |
| 11 May | 6 | 30 | 12.3 | 6.2 | 0.492 | 0.571 | 8.543  | 0.541 |
| 18 May | 6 | 16 | 14.3 | 7.5 | 0.377 | 0.499 | 9.179  | 0.679 |
| 18 May | 6 | 17 | 21   | 9.8 | 0.409 | 0.804 | 23.062 | 1.576 |
| 18 May | 6 | 18 | 10.2 | 5.3 | 0.491 | 0.769 | 4.579  | 0.334 |
| 18 May | 6 | 19 | 14.5 | 7.1 | 0.506 | 0.791 | 7.043  | 0.497 |
| 18 May | 6 | 20 | 10.5 | 5   | 0.394 | 0.631 | 3.562  | 0.236 |
| 25 May | 6 | 16 | 13.6 | 7   | 0.429 | 0.781 |        |       |
| 25 May | 6 | 17 | 10.5 | 5.3 | 0.759 | 0.847 |        |       |
| 25 May | 6 | 18 | 7.8  | 4.5 | 0.526 | 0.849 |        |       |
| 25 May | 6 | 19 | 11.5 | 5.7 | 0.458 | 0.751 |        |       |
| 25 May | 6 | 20 | 12.3 | 6.9 | 0.459 | 0.728 |        |       |
| 4 May  | 7 | 31 | 15.2 | 7.5 | 0.493 | 0.602 |        |       |
| 4 May  | 7 | 32 | 14.6 | 8.1 | 0.591 | 0.697 |        |       |
| 4 May  | 7 | 33 | 10.5 | 5.6 | 0.511 | 0.709 |        |       |
| 4 May  | 7 | 34 | 16.2 | 8.6 | 0.681 | 0.712 |        |       |
| 4 May  | 7 | 35 | 14.3 | 7.6 | 0.599 | 0.708 |        |       |
| 11 May | 7 | 31 | 10   | 5.7 | 0.493 | 0.602 | 4.197  | 0.268 |
| 11 May | 7 | 32 | 12.8 | 6   | 0.591 | 0.697 | 5.455  | 0.394 |
| 11 May | 7 | 33 | 8.6  | 4   | 0.511 | 0.709 | 2.151  | 0.119 |
| 11 May | 7 | 34 | 10.6 | 4.8 | 0.681 | 0.712 | 3.414  | 0.202 |
| 11 May | 7 | 35 | 10.5 | 5.7 | 0.599 | 0.708 | 5.527  | 0.382 |
| 18 May | 7 | 21 | 14.6 | 7   | 0.541 | 0.836 | 5.973  | 0.331 |
| 18 May | 7 | 22 | 15.6 | 8   | 0.391 | 0.794 | 7.455  | 0.354 |
| 18 May | 7 | 23 | 11.1 | 5.6 | 0.244 | 0.531 | 3.791  | 0.223 |
| 18 May | 7 | 24 | 16.9 | 8   | 0.391 | 0.736 | 11.134 | 0.559 |
| 18 May | 7 | 25 | 10.5 | 4.5 | 0.376 | 0.764 | 2.901  | 0.155 |
| 25 May | 7 | 21 | 14   | 6.8 | 0.624 | 0.819 |        |       |
| 25 May | 7 | 22 | 12.5 | 6.2 | 0.514 | 0.791 |        |       |
| 25 May | 7 | 23 | 11.3 | 5.5 | 0.459 | 0.712 |        |       |

|        |    |    |      |      |       |       |        |       |
|--------|----|----|------|------|-------|-------|--------|-------|
| 25 May | 7  | 24 | 10.5 | 5    | 0.479 | 0.784 |        |       |
| 25 May | 7  | 25 | 10   | 4.8  | 0.268 | 0.437 |        |       |
| 4 May  | 8  | 36 | 16.4 | 8.5  | 0.431 | 0.741 |        |       |
| 4 May  | 8  | 37 | 19.4 | 9.4  | 0.391 | 0.671 |        |       |
| 4 May  | 8  | 38 | 21.5 | 11.2 | 0.487 | 0.784 |        |       |
| 4 May  | 8  | 39 | 18.3 | 9.4  | 0.491 | 0.799 |        |       |
| 4 May  | 8  | 40 | 17.3 | 8.6  | 0.490 | 0.681 |        |       |
| 11 May | 8  | 36 | 12.6 | 6.5  | 0.431 | 0.671 | 11.127 | 1 1   |
| 11 May | 8  | 37 | 11.5 | 6.3  | 0.391 | 0.571 | 6.22   | 0.522 |
| 11 May | 8  | 38 | 8    | 3.2  | 0.701 | 0.891 | 2.265  | 0.199 |
| 11 May | 8  | 39 | 12   | 5.9  | 0.491 | 0.612 | 6.27   | 0.448 |
| 11 May | 8  | 40 | 6    | 2.5  | 0.490 | 0.641 | 1.864  | 0.128 |
| 18 May | 8  | 26 | 19.3 | 9    | 0.341 | 0.694 | 16.358 | 0.896 |
| 18 May | 8  | 27 | 14   | 6.5  | 0.491 | 0.782 | 7.663  | 0.573 |
| 18 May | 8  | 28 | 12   | 6.2  | 0.366 | 0.722 | 4.763  | 0.319 |
| 18 May | 8  | 29 | 8.5  | 4.1  | 0.374 | 0.694 | 2.088  | 0.122 |
| 18 May | 8  | 30 | 10.5 | 5.2  | 0.314 | 0.655 | 3.303  | 0.176 |
| 25 May | 8  | 26 | 19.5 | 9.2  | 0.495 | 0.628 |        |       |
| 25 May | 8  | 27 | 17.8 | 8.3  | 0.549 | 0.715 |        |       |
| 25 May | 8  | 28 | 15   | 7.5  | 0.397 | 0.632 |        |       |
| 25 May | 8  | 29 | 26.5 | 14.2 | 0.416 | 0.749 |        |       |
| 25 May | 8  | 30 | 22.8 | 11.5 | 0.487 | 0.785 |        |       |
| 4 May  | 9  | 41 | 6.7  | 3.7  | 0.364 | 0.715 |        |       |
| 4 May  | 9  | 42 | 7.2  | 4.2  | 0.341 | 0.715 |        |       |
| 4 May  | 9  | 43 | 6.5  | 3.9  | 0.415 | 0.715 |        |       |
| 4 May  | 9  | 44 | 5.2  | 2.4  | 0.364 | 0.691 |        |       |
| 4 May  | 9  | 45 | 6.9  | 3.5  | 0.514 | 0.761 |        |       |
| 11 May | 9  | 41 | 7.5  | 3.7  | 0.614 | 0.715 | 1.927  | 0.096 |
| 11 May | 9  | 42 | 8.8  | 4.9  | 0.531 | 0.681 | 1.908  | 0.097 |
| 11 May | 9  | 43 | 8.5  | 4.3  | 0.591 | 0.708 | 2.098  | 0.132 |
| 11 May | 9  | 44 | 6.7  | 3.2  | 0.491 | 0.681 | 1.196  | 0.096 |
| 11 May | 9  | 45 | 7.2  | 3    | 0.471 | 0.612 | 1.22   | 0.078 |
| 18 May | 9  | 31 | 13   | 5    | 0.45  | 0.634 | 6.8789 | 0.439 |
| 18 May | 9  | 32 | 11.9 | 5.2  | 0.481 | 0.711 | 5.664  | 0.309 |
| 18 May | 9  | 33 | 8.7  | 4.3  | 0.394 | 0.736 | 1.898  | 0.086 |
| 18 May | 9  | 34 | 12.9 | 6.2  | 0.297 | 0.541 | 5.249  | 0.278 |
| 18 May | 9  | 35 | 8.5  | 4.1  | 0.597 | 0.864 | 1.421  | 0.049 |
| 25 May | 9  | 31 | 15.4 | 8.2  | 0.463 | 0.716 |        |       |
| 25 May | 9  | 32 | 10.7 | 5.2  | 0.485 | 0.827 |        |       |
| 25 May | 9  | 33 | 12.5 | 6.2  | 0.478 | 0.792 |        |       |
| 25 May | 9  | 34 | 11.7 | 6    | 0.503 | 0.816 |        |       |
| 25 May | 9  | 35 | 8.5  | 4.2  | 0.415 | 0.624 |        |       |
| 4 May  | 10 | 46 | 18.4 | 8.6  | 0.361 | 0.531 |        |       |
| 4 May  | 10 | 47 | 12.3 | 5.8  | 0.492 | 0.671 |        |       |
| 4 May  | 10 | 48 | 11.4 | 5    | 0.751 | 0.861 |        |       |

|         |    |    |      |      |       |       |        |       |
|---------|----|----|------|------|-------|-------|--------|-------|
| 4 May   | 10 | 49 | 8.9  | 4.3  | 0.509 | 0.791 |        |       |
| 4 May   | 10 | 50 | 9.2  | 4.8  | 0.491 | 0.651 |        |       |
| 11 May  | 10 | 46 | 18.4 | 8.6  | 0.361 | 0.531 | 8.668  | 0.983 |
| 11 May  | 10 | 47 | 12.3 | 5.8  | 0.492 | 0.671 | 10.612 | 0.808 |
| 11 May  | 10 | 48 | 11.4 | 5    | 0.751 | 0.861 | 4.146  | 0.321 |
| 11 May  | 10 | 49 | 8.9  | 4.3  | 0.509 | 0.791 | 1.434  | 0.128 |
| 11 May  | 10 | 50 | 9.2  | 4.8  | 0.491 | 0.651 | 3.794  | 0.449 |
| 18 May  | 10 | 36 | 12.4 | 6    | 0.461 | 0.743 | 10.613 | 0.638 |
| 18 May  | 10 | 37 | 11   | 5    | 0.499 | 0.749 | 7.098  | 0.371 |
| 18 May  | 10 | 38 | 9    | 4.3  | 0.346 | 0.694 | 2.532  | 0.152 |
| 18 May  | 10 | 39 | 8.9  | 4.1  | 0.461 | 0.731 | 3.528  | 0.223 |
| 18 May  | 10 | 40 | 6    | 2.8  | 0.366 | 0.671 | 3.78   | 0.212 |
| 25 May  | 10 | 36 | 10   | 4.7  | 0.459 | 0.843 |        |       |
| 25 May  | 10 | 37 | 11.3 | 6.5  | 0.289 | 0.671 |        |       |
| 25 May  | 10 | 38 | 7.6  | 3.8  | 0.492 | 0.791 |        |       |
| 25 May  | 10 | 39 | 9    | 4.6  | 0.746 | 0.892 |        |       |
| 25 May  | 10 | 40 | 12.4 | 6.3  | 0.489 | 0.772 |        |       |
| 1 June  | 4  | 1  | 12   | 5.5  | 0.354 | 0.641 | 18.743 | 1.194 |
| 1 June  | 4  | 2  | 15   | 7.6  | 0.366 | 0.687 | 25.963 | 1.481 |
| 1 June  | 4  | 3  | 14   | 6.5  | 0.412 | 0.791 | 22.321 | 1.388 |
| 1 June  | 4  | 4  | 13.5 | 6.5  | 0.394 | 0.721 | 18.762 | 1.12  |
| 1 June  | 4  | 5  | 10   | 4    | 0.415 | 0.744 | 10.573 | 0.643 |
| 8 June  | 4  | 1  | 13   | 5.8  | 0.489 | 0.615 |        |       |
| 8 June  | 4  | 2  | 10.6 | 5.2  | 0.412 | 0.706 |        |       |
| 8 June  | 4  | 3  | 8.5  | 4.8  | 0.792 | 0.796 |        |       |
| 8 June  | 4  | 4  | 9.7  | 5.7  | 0.269 | 0.791 |        |       |
| 8 June  | 4  | 5  | 12.3 | 5.8  | 0.487 | 0.592 |        |       |
| 15 June | 4  | 1  | 19   | 9    | 0.715 | 0.805 | 49.738 | 3.143 |
| 15 June | 4  | 2  | 16.8 | 8.5  | 0.725 | 0.844 | 48.936 | 6.37  |
| 15 June | 4  | 3  | 17.4 | 7.5  | 0.641 | 0.794 | 30.764 | 2.212 |
| 15 June | 4  | 4  | 14   | 6.3  | 0.694 | 0.795 | 25.848 | 2.185 |
| 15 June | 4  | 5  | 16.5 | 8.5  | 0.65  | 0.791 | 52.798 | 5.565 |
| 22 June | 4  | 1  | 23.4 | 11.2 | 0.514 | 0.879 |        |       |
| 22 June | 4  | 2  | 26.5 | 12.7 | 0.598 | 0.684 |        |       |
| 22 June | 4  | 3  | 12.5 | 6.1  | 0.684 | 0.798 |        |       |
| 22 June | 4  | 4  | 14.2 | 7    | 0.571 | 0.644 |        |       |
| 22 June | 4  | 5  | 25.1 | 11.6 | 0.732 | 0.844 |        |       |
| 29 June | 4  | 1  | 17.6 | 8.5  | 0.786 | 0.831 | 47.12  | 4 1   |
| 29 June | 4  | 2  | 17.5 | 9    | 0.757 | 0.656 | 40.282 | 3.848 |
| 29 June | 4  | 3  | 15.6 | 8    | 0.777 | 0.812 | 43.258 | 2.989 |
| 29 June | 4  | 4  | 17.3 | 8.5  | 0.759 | 0.805 | 53.126 | 5.152 |
| 29 June | 4  | 5  | 14.6 | 7.2  | 0.752 | 0.801 | 21.728 | 1.11  |
| 1 June  | 5  | 6  | 10.3 | 4    | 0.499 | 0.796 | 9.624  | 1.333 |
| 1 June  | 5  | 7  | 14   | 7.3  | 0.421 | 0.784 | 31.02  | 0.812 |
| 1 June  | 5  | 8  | 15   | 6.5  | 0.394 | 0.706 | 20.909 | 2.522 |

|         |   |    |      |      |       |       |        |        |
|---------|---|----|------|------|-------|-------|--------|--------|
| 1 June  | 5 | 9  | 7.5  | 4    | 0.341 | 0.691 | 6.919  | 1.554  |
| 1 June  | 5 | 10 | 10   | 4    | 0.366 | 0.693 | 17.183 | 0.565  |
| 8 June  | 5 | 6  | 11.5 | 6    | 0.479 | 0.648 |        |        |
| 8 June  | 5 | 7  | 14.3 | 7.5  | 0.796 | 0.891 |        |        |
| 8 June  | 5 | 8  | 10.8 | 5.5  | 0.716 | 0.792 |        |        |
| 8 June  | 5 | 9  | 7.3  | 4    | 0.495 | 0.751 |        |        |
| 8 June  | 5 | 10 | 12.7 | 6.3  | 0.611 | 0.795 |        |        |
| 15 June | 5 | 6  | 15.8 | 7    | 0.725 | 0.815 | 82.823 | 6.422  |
| 15 June | 5 | 7  | 15.5 | 8    | 0.556 | 0.715 | 15.538 | 12.591 |
| 15 June | 5 | 8  | 12   | 6    | 0.569 | 0.791 | 44.023 | 5.101  |
| 15 June | 5 | 9  | 14.3 | 6.5  | 0.725 | 0.864 | 54.319 | 4.989  |
| 15 June | 5 | 10 | 15   | 6.5  | 0.699 | 0.841 | 80.973 | 8.256  |
| 22 June | 5 | 6  | 21.5 | 10.5 | 0.569 | 0.784 |        |        |
| 22 June | 5 | 7  | 16.5 | 8.4  | 0.541 | 0.764 |        |        |
| 22 June | 5 | 8  | 18.9 | 9.5  | 0.555 | 0.749 |        |        |
| 22 June | 5 | 9  | 19.2 | 9.1  | 0.682 | 0.784 |        |        |
| 22 June | 5 | 10 | 14.2 | 7.2  | 0.705 | 0.847 |        |        |
| 29 June | 5 | 6  | 13   | 6    | 0.725 | 0.646 | 15.464 | 1.494  |
| 29 June | 5 | 7  | 14.2 | 7    | 0.235 | 0.566 | 23.401 | 1.718  |
| 29 June | 5 | 8  | 14   | 6.5  | 0.461 | 0.615 | 22.213 | 2.116  |
| 29 June | 5 | 9  | 12.5 | 6.5  | 0.754 | 0.654 | 15.484 | 1.089  |
| 29 June | 5 | 10 | 10.5 | 4.5  | 0.746 | 0.636 | 17.169 | 1.474  |
| 1 June  | 6 | 11 | 14.1 | 7    | 0.481 | 0.709 | 25.921 | 2.167  |
| 1 June  | 6 | 12 | 14.4 | 5.9  | 0.509 | 0.806 | 26.779 | 2.116  |
| 1 June  | 6 | 13 | 13.3 | 6.5  | 0.371 | 0.671 | 27.5   | 2.029  |
| 1 June  | 6 | 14 | 7.8  | 4.3  | 0.349 | 0.792 | 10.057 | 0.663  |
| 1 June  | 6 | 15 | 10   | 4.5  | 0.461 | 0.655 | 11.018 | 0.862  |
| 8 June  | 6 | 11 | 14.5 | 7.2  | 0.418 | 0.516 |        |        |
| 8 June  | 6 | 12 | 13.2 | 6.5  | 0.493 | 0.717 |        |        |
| 8 June  | 6 | 13 | 10.8 | 5.2  | 0.496 | 0.648 |        |        |
| 8 June  | 6 | 14 | 12.5 | 6.5  | 0.431 | 0.761 |        |        |
| 8 June  | 6 | 15 | 8.9  | 4.5  | 0.503 | 0.815 |        |        |
| 15 June | 6 | 11 | 20   | 10   | 0.631 | 0.794 | 41.091 | 2.349  |
| 15 June | 6 | 12 | 11.4 | 5.5  | 0.702 | 0.845 | 8.201  | 0.455  |
| 15 June | 6 | 13 | 15   | 9.5  | 0.715 | 0.867 | 29.951 | 1.64   |
| 15 June | 6 | 14 | 12.1 | 6.5  | 0.694 | 0.794 | 12.016 | 0.722  |
| 15 June | 6 | 15 | 8    | 3.4  | 0.541 | 0.706 | 3.297  | 0.171  |
| 22 June | 6 | 11 | 15.2 | 8.2  | 0.674 | 0.861 |        |        |
| 22 June | 6 | 12 | 11.3 | 4.2  | 0.651 | 0.804 |        |        |
| 22 June | 6 | 13 | 11.2 | 6    | 0.687 | 0.827 |        |        |
| 22 June | 6 | 14 | 15.4 | 7.6  | 0.652 | 0.839 |        |        |
| 22 June | 6 | 15 | 14.2 | 7.2  | 0.644 | 0.819 |        |        |
| 29 June | 6 | 11 | 16.4 | 8.3  | 0.705 | 0.861 | 25.425 | 1.954  |
| 29 June | 6 | 12 | 12.6 | 6.5  | 0.751 | 0.864 | 16.784 | 1.657  |
| 29 June | 6 | 13 | 13.5 | 7.6  | 0.769 | 0.873 | 17.541 | 1.698  |

|         |   |    |      |      |       |       |        |        |
|---------|---|----|------|------|-------|-------|--------|--------|
| 29 June | 6 | 14 | 16.7 | 8.6  | 0.749 | 0.833 | 20.481 | 1.378  |
| 29 June | 6 | 15 | 15.3 | 7.2  | 0.722 | 0.819 | 18.694 | 1.224  |
| 1 June  | 7 | 16 | 13   | 5.5  | 0.497 | 0.697 | 5.916  | 0.332  |
| 1 June  | 7 | 17 | 16   | 6.5  | 0.394 | 0.555 | 10.702 | 0.573  |
| 1 June  | 7 | 18 | 21   | 9    | 0.344 | 0.587 | 20.692 | 1.341  |
| 1 June  | 7 | 19 | 19   | 8.5  | 0.495 | 0.791 | 17.755 | 0.855  |
| 1 June  | 7 | 20 | 14.3 | 7    | 0.471 | 0.761 | 11.627 | 0.909  |
| 8 June  | 7 | 16 | 15.8 | 8    | 0.475 | 0.726 |        |        |
| 8 June  | 7 | 17 | 19.3 | 9.8  | 0.492 | 0.715 |        |        |
| 8 June  | 7 | 18 | 10.5 | 5    | 0.413 | 0.681 |        |        |
| 8 June  | 7 | 19 | 8.8  | 5    | 0.429 | 0.731 |        |        |
| 8 June  | 7 | 20 | 14.8 | 8.3  | 0.437 | 0.792 |        |        |
| 15 June | 7 | 16 | 21   | 10.5 | 0.631 | 0.815 | 30.692 | 2.227  |
| 15 June | 7 | 17 | 25.1 | 13   | 0.791 | 0.897 | 39.158 | 2.558  |
| 15 June | 7 | 18 | 13.4 | 5.5  | 0.612 | 0.714 | 6.758  | 0.468  |
| 15 June | 7 | 19 | 15.5 | 8    | 0.677 | 0.794 | 5.826  | 0.379  |
| 15 June | 7 | 20 | 22   | 10   | 0.624 | 0.801 | 28.057 | 2.282  |
| 22 June | 7 | 16 | 17.2 | 9.2  | 0.632 | 0.837 |        |        |
| 22 June | 7 | 17 | 14.1 | 7.2  | 0.694 | 0.843 |        |        |
| 22 June | 7 | 18 | 10.6 | 5.8  | 0.633 | 0.827 |        |        |
| 22 June | 7 | 19 | 10.5 | 5.2  | 0.645 | 0.839 |        |        |
| 22 June | 7 | 20 | 19.5 | 9.5  | 0.687 | 0.817 |        |        |
| 29 June | 7 | 16 | 25.4 | 11.3 | 0.657 | 0.713 | 29.202 | 2.591  |
| 29 June | 7 | 17 | 21.6 | 10.8 | 0.764 | 0.809 | 22.958 | 1.468  |
| 29 June | 7 | 18 | 15.3 | 7.8  | 0.629 | 0.787 | 9.706  | 0.866  |
| 29 June | 7 | 19 | 21   | 6.2  | 0.683 | 0.817 | 9.848  | 0.955  |
| 29 June | 7 | 20 | 11.3 | 5.5  | 0.566 | 0.759 | 8.943  | 0.437  |
| 1 June  | 8 | 21 | 43.4 | 21   | 0.567 | 0.75  | 15.362 | 11.954 |
| 1 June  | 8 | 22 | 39   | 20.5 | 0.371 | 0.691 | 12.187 | 9.726  |
| 1 June  | 8 | 23 | 41   | 20   | 0.311 | 0.751 | 19.601 | 6.357  |
| 1 June  | 8 | 24 | 10.3 | 4.5  | 0.341 | 0.691 | 4.754  | 0.406  |
| 1 June  | 8 | 25 | 13.4 | 6.5  | 0.459 | 0.666 | 5.302  | 0.534  |
| 8 June  | 8 | 21 | 40.5 | 20   | 0.416 | 0.641 |        |        |
| 8 June  | 8 | 22 | 43.8 | 21.5 | 0.791 | 0.843 |        |        |
| 8 June  | 8 | 23 | 16.3 | 7    | 0.426 | 0.548 |        |        |
| 8 June  | 8 | 24 | 27.5 | 14   | 0.481 | 0.792 |        |        |
| 8 June  | 8 | 25 | 10.8 | 5.4  | 0.492 | 0.748 |        |        |
| 15 June | 8 | 21 | 20.5 | 9.5  | 0.652 | 0.797 | 22.674 | 2.251  |
| 15 June | 8 | 22 | 17   | 7.5  | 0.727 | 0.814 | 17.331 | 1.523  |
| 15 June | 8 | 23 | 17.5 | 8.5  | 0.757 | 0.805 | 11.397 | 2.219  |
| 15 June | 8 | 24 | 17.9 | 8.5  | 0.731 | 0.81  | 21.479 | 1.477  |
| 15 June | 8 | 25 | 13.7 | 6.6  | 0.733 | 0.773 | 4.33   | 0.413  |
| 22 June | 8 | 21 | 31.2 | 16.9 | 0.609 | 0.821 |        |        |
| 22 June | 8 | 22 | 15.2 | 7.2  | 0.659 | 0.827 |        |        |
| 22 June | 8 | 23 | 32.9 | 16   | 0.632 | 0.808 |        |        |

|         |    |    |      |      |       |       |        |       |
|---------|----|----|------|------|-------|-------|--------|-------|
| 22 June | 8  | 24 | 30.2 | 15.2 | 0.619 | 0.785 |        |       |
| 22 June | 8  | 25 | 34.5 | 16.5 | 0.797 | 0.825 |        |       |
| 29 June | 8  | 21 | 32.3 | 17.5 | 0.609 | 0.821 | 41.185 | 2.741 |
| 29 June | 8  | 22 | 16.2 | 8    | 0.659 | 0.827 | 13.874 | 0.813 |
| 29 June | 8  | 23 | 33   | 14   | 0.632 | 0.808 | 90.758 | 7.439 |
| 29 June | 8  | 24 | 15.5 | 7.5  | 0.619 | 0.785 | 8.421  | 1.097 |
| 29 June | 8  | 25 | 35.5 | 17   | 0.797 | 0.825 | 94.298 | 6.072 |
| 1 June  | 9  | 26 | 18.5 | 9    | 0.471 | 0.68  | 21.71  | 1.556 |
| 1 June  | 9  | 27 | 9.3  | 5.4  | 0.394 | 0.791 | 2.04   | 0.191 |
| 1 June  | 9  | 28 | 21.5 | 9.5  | 0.305 | 0.796 | 23.626 | 1.779 |
| 1 June  | 9  | 29 | 12   | 5.5  | 0.406 | 0.597 | 4.318  | 0.258 |
| 1 June  | 9  | 30 | 12   | 6    | 0.497 | 0.794 | 7.568  | 0.601 |
| 8 June  | 9  | 26 | 20.4 | 10.5 | 0.588 | 0.806 |        |       |
| 8 June  | 9  | 27 | 8.5  | 4.3  | 0.462 | 0.748 |        |       |
| 8 June  | 9  | 28 | 17.3 | 8.8  | 0.469 | 0.716 |        |       |
| 8 June  | 9  | 29 | 12.5 | 6.5  | 0.791 | 0.842 |        |       |
| 8 June  | 9  | 30 | 15.2 | 7.5  | 0.493 | 0.621 |        |       |
| 15 June | 9  | 26 | 14.7 | 7.5  | 0.694 | 0.784 | 18.398 | 1.24  |
| 15 June | 9  | 27 | 12   | 5.5  | 0.654 | 0.794 | 7.519  | 0.483 |
| 15 June | 9  | 28 | 12.3 | 6    | 0.644 | 0.804 | 8.432  | 0.637 |
| 15 June | 9  | 29 | 10.1 | 4.5  | 0.67  | 0.836 | 7.706  | 0.864 |
| 15 June | 9  | 30 | 13.2 | 6.5  | 0.741 | 0.854 | 5.813  | 0.48  |
| 22 June | 9  | 26 | 25.4 | 12.6 | 0.751 | 0.873 |        |       |
| 22 June | 9  | 27 | 22.3 | 11.4 | 0.719 | 0.824 |        |       |
| 22 June | 9  | 28 | 14.2 | 7.8  | 0.753 | 0.873 |        |       |
| 22 June | 9  | 29 | 19.5 | 9.4  | 0.791 | 0.819 |        |       |
| 22 June | 9  | 30 | 15.4 | 7.6  | 0.688 | 0.834 |        |       |
| 29 June | 9  | 26 | 26.3 | 13.7 | 0.764 | 0.857 | 41.214 | 2.546 |
| 29 June | 9  | 27 | 23.1 | 12.4 | 0.751 | 0.894 | 38.475 | 1.657 |
| 29 June | 9  | 28 | 15.3 | 7.9  | 0.764 | 0.897 | 17.654 | 0.687 |
| 29 June | 9  | 29 | 20.1 | 10.9 | 0.746 | 0.854 | 27.354 | 1.684 |
| 29 June | 9  | 30 | 16.2 | 8.6  | 0.784 | 0.804 | 19.647 | 0.478 |
| 1 June  | 10 | 31 | 13   | 7    | 0.541 | 0.779 | 6.198  | 0.407 |
| 1 June  | 10 | 32 | 14.3 | 7    | 0.497 | 0.836 | 9.023  | 0.849 |
| 1 June  | 10 | 33 | 13.7 | 6    | 0.486 | 0.845 | 10.898 | 0.689 |
| 1 June  | 10 | 34 | 10.3 | 4.5  | 0.571 | 0.795 | 5.348  | 0.475 |
| 1 June  | 10 | 35 | 9.6  | 4.5  | 0.364 | 0.694 | 4.318  | 0.388 |
| 8 June  | 10 | 31 | 14.5 | 8    | 0.519 | 0.871 |        |       |
| 8 June  | 10 | 32 | 10.8 | 5.5  | 0.492 | 0.524 |        |       |
| 8 June  | 10 | 33 | 12.3 | 6.2  | 0.801 | 0.892 |        |       |
| 8 June  | 10 | 34 | 8.5  | 4.5  | 0.436 | 0.732 |        |       |
| 8 June  | 10 | 35 | 11.8 | 6    | 0.419 | 0.761 |        |       |
| 15 June | 10 | 31 | 17   | 9    | 0.721 | 0.885 | 19.859 | 1.636 |
| 15 June | 10 | 32 | 13.3 | 6.4  | 0.711 | 0.841 | 13.932 | 1.961 |
| 15 June | 10 | 33 | 10   | 5.4  | 0.761 | 0.897 | 3.923  | 0.26  |

|         |    |    |      |      |       |       |        |       |
|---------|----|----|------|------|-------|-------|--------|-------|
| 15 June | 10 | 34 | 9.6  | 4    | 0.692 | 0.864 | 4.858  | 0.366 |
| 15 June | 10 | 35 | 8    | 4.8  | 0.666 | 0.749 | 3.459  | 0.395 |
| 22 June | 10 | 31 | 12.5 | 6.2  | 0.749 | 0.801 |        |       |
| 22 June | 10 | 32 | 13.2 | 7.5  | 0.731 | 0.808 |        |       |
| 22 June | 10 | 33 | 20.3 | 10.2 | 0.637 | 0.817 |        |       |
| 22 June | 10 | 34 | 20.1 | 10.3 | 0.766 | 0.835 |        |       |
| 22 June | 10 | 35 | 24.6 | 11.2 | 0.663 | 0.814 |        |       |
| 29 June | 10 | 31 | 22.5 | 12.5 | 0.739 | 0.801 | 47.342 | 2.391 |
| 29 June | 10 | 32 | 14.5 | 7.5  | 0.731 | 0.808 | 16.4   | 0.825 |
| 29 June | 10 | 33 | 20.4 | 10.3 | 0.637 | 0.817 | 18.019 | 0.834 |
| 29 June | 10 | 34 | 21.2 | 11.3 | 0.766 | 0.835 | 17.674 | 1.314 |
| 29 June | 10 | 35 | 22.3 | 11   | 0.663 | 0.814 | 22.487 | 0.963 |
| 6 July  | 4  | 1  | 17.8 | 8.5  | 0.586 | 0.731 |        |       |
| 6 July  | 4  | 2  | 14.5 | 7    | 0.757 | 0.656 |        |       |
| 6 July  | 4  | 3  | 15.8 | 6.3  | 0.777 | 0.812 |        |       |
| 6 July  | 4  | 4  | 17.3 | 7.8  | 0.759 | 0.805 |        |       |
| 6 July  | 4  | 5  | 13.6 | 6.5  | 0.652 | 0.701 |        |       |
| 13 July | 4  | 1  | 15.8 | 7.5  | 0.586 | 0.731 |        |       |
| 13 July | 4  | 2  | 14.5 | 7    | 0.757 | 0.656 |        |       |
| 13 July | 4  | 3  | 15.8 | 6.3  | 0.777 | 0.812 |        |       |
| 13 July | 4  | 4  | 17.3 | 7.8  | 0.759 | 0.805 |        |       |
| 13 July | 4  | 5  | 13.6 | 6.5  | 0.652 | 0.701 |        |       |
| 20 July | 4  | 1  | 15.5 | 7    | 0.768 | 0.817 | 21.091 | 1     |
| 20 July | 4  | 2  | 23   | 11.5 | 0.651 | 0.776 | 38.098 | 2     |
| 20 July | 4  | 3  | 18   | 8.5  | 0.829 | 0.879 | 18.432 | 2     |
| 20 July | 4  | 4  | 18   | 9    | 0.559 | 0.657 | 30.658 | 2     |
| 20 July | 4  | 5  | 12.5 | 6.3  | 0.762 | 0.817 | 9.301  | 2     |
| 27 July | 4  | 1  | 15.5 | 7    | 0.768 | 0.817 |        |       |
| 27 July | 4  | 2  | 23   | 11.5 | 0.651 | 0.776 |        |       |
| 27 July | 4  | 3  | 18   | 8.5  | 0.829 | 0.879 |        |       |
| 27 July | 4  | 4  | 18   | 9    | 0.559 | 0.657 |        |       |
| 27 July | 4  | 5  | 12.5 | 6.3  | 0.762 | 0.817 |        |       |
| 6 July  | 5  | 6  | 13   | 6.5  | 0.725 | 0.646 |        |       |
| 6 July  | 5  | 7  | 14.9 | 7.9  | 0.235 | 0.566 |        |       |
| 6 July  | 5  | 8  | 14   | 6.8  | 0.461 | 0.615 |        |       |
| 6 July  | 5  | 9  | 12.5 | 5.6  | 0.754 | 0.654 |        |       |
| 6 July  | 5  | 10 | 11.5 | 7.4  | 0.746 | 0.636 |        |       |
| 13 July | 5  | 6  | 13   | 6.5  | 0.725 | 0.646 |        |       |
| 13 July | 5  | 7  | 14.9 | 7.9  | 0.235 | 0.566 |        |       |
| 13 July | 5  | 8  | 14   | 6.8  | 0.461 | 0.615 |        |       |
| 13 July | 5  | 9  | 12.5 | 5.6  | 0.754 | 0.654 |        |       |
| 13 July | 5  | 10 | 11.5 | 7.4  | 0.746 | 0.636 |        |       |
| 20 July | 5  | 6  | 11   | 5    | 0.661 | 0.796 | 10.146 | 1     |
| 20 July | 5  | 7  | 8.5  | 4.5  | 0.821 | 0.892 | 11.504 | 2     |
| 20 July | 5  | 8  | 7.2  | 3    | 0.768 | 0.817 | 9.425  | 2     |

|         |   |    |      |      |       |       |        |      |
|---------|---|----|------|------|-------|-------|--------|------|
| 20 July | 5 | 9  | 11.5 | 5    | 0.661 | 0.796 | 22.402 | 2    |
| 20 July | 5 | 10 | 10.5 | 4.5  | 0.829 | 0.879 | 12.8   | 2    |
| 27 July | 5 | 6  | 11   | 5    | 0.661 | 0.796 |        |      |
| 27 July | 5 | 7  | 8.5  | 4.5  | 0.821 | 0.892 |        |      |
| 27 July | 5 | 8  | 7.2  | 3    | 0.768 | 0.817 |        |      |
| 27 July | 5 | 9  | 11.5 | 5    | 0.661 | 0.796 |        |      |
| 27 July | 5 | 10 | 10.5 | 4.5  | 0.829 | 0.879 |        |      |
| 6 July  | 6 | 11 | 16.1 | 7    | 0.705 | 0.861 |        |      |
| 6 July  | 6 | 12 | 12.6 | 6.5  | 0.751 | 0.864 |        |      |
| 6 July  | 6 | 13 | 12.7 | 7    | 0.769 | 0.873 |        |      |
| 6 July  | 6 | 14 | 16.7 | 8.5  | 0.749 | 0.833 |        |      |
| 6 July  | 6 | 15 | 16.3 | 8    | 0.722 | 0.819 |        |      |
| 13 July | 6 | 11 | 16.1 | 7    | 0.705 | 0.861 |        |      |
| 13 July | 6 | 12 | 12.6 | 6.5  | 0.751 | 0.864 |        |      |
| 13 July | 6 | 13 | 12.7 | 7    | 0.769 | 0.873 |        |      |
| 13 July | 6 | 14 | 16.7 | 8.5  | 0.749 | 0.833 |        |      |
| 13 July | 6 | 15 | 16.3 | 8    | 0.722 | 0.819 |        |      |
| 20 July | 6 | 11 | 15.2 | 7.2  | 0.559 | 0.657 | 20.561 | 2    |
| 20 July | 6 | 12 | 11.8 | 5    | 0.762 | 0.817 | 27.8   | 2    |
| 20 July | 6 | 13 | 14.2 | 7.5  | 0.661 | 0.796 | 25.94  | 2    |
| 20 July | 6 | 14 | 20.3 | 9.4  | 0.821 | 0.892 | 50     | 2    |
| 20 July | 6 | 15 | 18.5 | 9    | 0.756 | 0.867 | 30     | 2    |
| 27 July | 6 | 11 | 20.4 | 7.2  | 0.559 | 0.657 |        |      |
| 27 July | 6 | 12 | 15.4 | 5    | 0.762 | 0.817 |        |      |
| 27 July | 6 | 13 | 16.7 | 7.5  | 0.661 | 0.796 |        |      |
| 27 July | 6 | 14 | 19.5 | 9.4  | 0.821 | 0.892 |        |      |
| 27 July | 6 | 15 | 14.3 | 9    | 0.756 | 0.867 |        |      |
| 6 July  | 7 | 16 | 26.8 | 16   | 0.657 | 0.713 |        |      |
| 6 July  | 7 | 17 | 21.9 | 10.5 | 0.764 | 0.809 |        |      |
| 6 July  | 7 | 18 | 15.3 | 7    | 0.629 | 0.787 |        |      |
| 6 July  | 7 | 19 | 20   | 10.5 | 0.683 | 0.817 |        |      |
| 6 July  | 7 | 20 | 11.3 | 10.8 | 0.566 | 0.759 |        |      |
| 13 July | 7 | 16 | 26.8 | 16   | 0.657 | 0.713 |        |      |
| 13 July | 7 | 17 | 21.9 | 10.5 | 0.764 | 0.809 |        |      |
| 13 July | 7 | 18 | 15.3 | 7    | 0.629 | 0.787 |        |      |
| 13 July | 7 | 19 | 20   | 10.5 | 0.683 | 0.817 |        |      |
| 13 July | 7 | 20 | 11.3 | 10.8 | 0.566 | 0.759 |        |      |
| 20 July | 7 | 16 | 25   | 12   | 0.775 | 0.798 | 20.622 | 2    |
| 20 July | 7 | 17 | 27   | 13.4 | 0.759 | 0.81  | 37.115 | 2    |
| 20 July | 7 | 18 | 28   | 12   | 0.793 | 0.814 | 38.731 | 2    |
| 20 July | 7 | 19 | 27.5 | 13.5 | 0.607 | 0.781 | 42.344 | 2.65 |
| 20 July | 7 | 20 | 20   | 10   | 0.551 | 0.657 | 29.964 | 2    |
| 27 July | 7 | 16 | 25   | 12   | 0.775 | 0.798 |        |      |
| 27 July | 7 | 17 | 27   | 13.4 | 0.759 | 0.81  |        |      |
| 27 July | 7 | 18 | 28   | 12   | 0.793 | 0.814 |        |      |

|         |    |    |      |      |       |       |    |   |
|---------|----|----|------|------|-------|-------|----|---|
| 27 July | 7  | 19 | 27.5 | 13.5 | 0.607 | 0.781 |    |   |
| 27 July | 7  | 20 | 20   | 10   | 0.551 | 0.657 |    |   |
| 6 July  | 8  | 21 | 32.3 | 16.5 | 0.609 | 0.821 |    |   |
| 6 July  | 8  | 22 | 17   | 8.9  | 0.659 | 0.827 |    |   |
| 6 July  | 8  | 23 | 33   | 16   | 0.632 | 0.808 |    |   |
| 6 July  | 8  | 24 | 13.5 | 7    | 0.619 | 0.785 |    |   |
| 6 July  | 8  | 25 | 37.5 | 18.5 | 0.797 | 0.825 |    |   |
| 13 July | 8  | 21 | 34.3 | 17   | 0.609 | 0.821 |    |   |
| 13 July | 8  | 22 | 17   | 8.9  | 0.659 | 0.827 |    |   |
| 13 July | 8  | 23 | 33   | 16   | 0.632 | 0.808 |    |   |
| 13 July | 8  | 24 | 13.5 | 7    | 0.619 | 0.785 |    |   |
| 13 July | 8  | 25 | 37.5 | 18.5 | 0.797 | 0.825 |    |   |
| 20 July | 8  | 21 | 30.2 | 14.5 | 0.768 | 0.817 | 16 | 3 |
| 20 July | 8  | 22 | 20.3 | 10   | 0.661 | 0.796 | 20 | 1 |
| 20 July | 8  | 23 | 32.1 | 11.5 | 0.829 | 0.879 | 52 | 3 |
| 20 July | 8  | 24 | 18.5 | 9    | 0.559 | 0.657 | 40 | 2 |
| 20 July | 8  | 25 | 30.1 | 14   | 0.762 | 0.817 | 20 | 3 |
| 27 July | 8  | 21 | 18   | 14.5 | 0.768 | 0.817 |    |   |
| 27 July | 8  | 22 | 16.2 | 10   | 0.661 | 0.796 |    |   |
| 27 July | 8  | 23 | 30.5 | 11.5 | 0.829 | 0.879 |    |   |
| 27 July | 8  | 24 | 28.6 | 9    | 0.559 | 0.657 |    |   |
| 27 July | 8  | 25 | 30.1 | 14   | 0.762 | 0.817 |    |   |
| 6 July  | 9  | 26 | 26.3 | 15   | 0.764 | 0.857 |    |   |
| 6 July  | 9  | 27 | 22.1 | 15.5 | 0.751 | 0.894 |    |   |
| 6 July  | 9  | 28 | 15.3 | 7    | 0.764 | 0.897 |    |   |
| 6 July  | 9  | 29 | 20.1 | 10.5 | 0.746 | 0.854 |    |   |
| 6 July  | 9  | 30 | 18.5 | 9.5  | 0.784 | 0.804 |    |   |
| 13 July | 9  | 26 | 26.3 | 15   | 0.764 | 0.857 |    |   |
| 13 July | 9  | 27 | 22.1 | 15.5 | 0.751 | 0.894 |    |   |
| 13 July | 9  | 28 | 25.3 | 14   | 0.764 | 0.897 |    |   |
| 13 July | 9  | 29 | 20.1 | 10.5 | 0.746 | 0.854 |    |   |
| 13 July | 9  | 30 | 18.5 | 9.5  | 0.784 | 0.804 |    |   |
| 20 July | 9  | 26 | 35.3 | 17.2 | 0.661 | 0.796 | 35 | 3 |
| 20 July | 9  | 27 | 30.6 | 15.5 | 0.821 | 0.892 | 41 | 3 |
| 20 July | 9  | 28 | 20.2 | 9    | 0.752 | 0.832 | 38 |   |
| 20 July | 9  | 29 | 31.8 | 14.5 | 0.716 | 0.829 | 25 | 2 |
| 20 July | 9  | 30 | 25.7 | 13.7 | 0.702 | 0.782 | 27 | 2 |
| 27 July | 9  | 26 | 35.3 | 17.2 | 0.661 | 0.796 |    |   |
| 27 July | 9  | 27 | 37.4 | 15.5 | 0.821 | 0.892 |    |   |
| 27 July | 9  | 28 | 31.6 | 9    | 0.752 | 0.832 |    |   |
| 27 July | 9  | 29 | 38.3 | 14.5 | 0.716 | 0.829 |    |   |
| 27 July | 9  | 30 | 25.4 | 13.7 | 0.702 | 0.782 |    |   |
| 6 July  | 10 | 31 | 22.5 | 12.5 | 0.739 | 0.801 |    |   |
| 6 July  | 10 | 32 | 14.5 | 7.5  | 0.731 | 0.808 |    |   |
| 6 July  | 10 | 33 | 26.9 | 15   | 0.637 | 0.817 |    |   |

|         |    |    |      |      |       |       |        |   |
|---------|----|----|------|------|-------|-------|--------|---|
| 6 July  | 10 | 34 | 21.2 | 10.4 | 0.766 | 0.835 |        |   |
| 6 July  | 10 | 35 | 21.8 | 17   | 0.663 | 0.814 |        |   |
| 13 July | 10 | 31 | 22.5 | 12.5 | 0.739 | 0.801 |        |   |
| 13 July | 10 | 32 | 30.5 | 15.5 | 0.731 | 0.808 |        |   |
| 13 July | 10 | 33 | 26.9 | 15   | 0.637 | 0.817 |        |   |
| 13 July | 10 | 34 | 25.2 | 15   | 0.766 | 0.835 |        |   |
| 13 July | 10 | 35 | 21.8 | 17   | 0.663 | 0.814 |        |   |
| 20 July | 10 | 31 | 28.2 | 13.5 | 0.759 | 0.657 | 26.285 | 2 |
| 20 July | 10 | 32 | 33   | 16   | 0.766 | 0.817 | 41.882 | 3 |
| 20 July | 10 | 33 | 37.5 | 18   | 0.661 | 0.796 | 80.789 | 3 |
| 20 July | 10 | 34 | 28   | 13.5 | 0.739 | 0.801 | 36.3   | 3 |
| 20 July | 10 | 35 | 23   | 10.5 | 0.731 | 0.808 | 24.562 | 1 |
| 27 July | 10 | 31 | 28.2 | 13.5 | 0.759 | 0.657 |        |   |
| 27 July | 10 | 32 | 33   | 16   | 0.766 | 0.817 |        |   |
| 27 July | 10 | 33 | 37.5 | 18   | 0.661 | 0.796 |        |   |
| 27 July | 10 | 34 | 28   | 13.5 | 0.739 | 0.801 |        |   |
| 27 July | 10 | 35 | 23   | 10.5 | 0.731 | 0.808 |        |   |
